# Supplementary material
Source: PubMed Central journal article supplement (PMC6238744)
Supplement: jciinsight-3-120974-s226.pdf [file jciinsight-3-120974-s226.pdf]

# SUPPLEMENTARY MATERIALS

## Signatures of CD8<sup>+</sup> T-cell dysfunction in AML patients and their reversibility with response to chemotherapy

Hanna A. Knaus, Sofia Berglund, Hubert Hackl, Amanda L. Blackford, Joshua F. Zeidner, Raúl Montiel-Esparza, Rupkatha Mukhopadhyay, Katrina Vanura, Bruce R. Blazar, Judith E. Karp, Leo Luznik\*, Ivana Gojo\*

\*Corresponding authors. E-mail: luznile@jhmi.edu, igojo1@jhmi.edu

The file includes:

### SUPPLEMENTARY METHODS

### SUPPLEMENTARY FIGURES

**Fig. S1.** Gating strategy and cytokine production by AML CD8<sup>+</sup> T-cells.

**Fig. S2.** AML blasts affect dynamics of co-signaling molecules expression, expansion, and apoptosis of CD8<sup>+</sup> T-cells.

**Fig. S3.** Validation of gene expression differences identified by microarray analysis, and gene ontology analysis for pre-treatment AML versus HC and post-treatment AML CR versus NR CD8<sup>+</sup> T-cell comparisons.

**Fig. S4.** Derived gene sets and representative GSEA enrichment plots.

**Fig. S5.** Co-expression of IRs in the marrow CD8<sup>+</sup> T-cells from AML patients.

**Fig. S6.** Correlation of immune subsets with disease and patient variables.

**Fig. S7.** Fluorescence activated cell sorting gating strategy for isolation of highly purified CD8<sup>+</sup> T-cells.

### SUPPLEMENTARY TABLES

**Table S1.** Differentially expressed genes in pre-treatment AML patients relative to healthy controls.

**Table S2.** Characterization of CD8<sup>+</sup> T-cell transcriptional signatures from AML patients at diagnosis according to their subsequent response to chemotherapy.

**Table S3.** Differentially expressed genes in CR relative to NR AML patients post induction chemotherapy.

**Table S4.** Gene signatures specific for naive, T<sub>CM</sub>, T<sub>EM</sub>, T<sub>EMRA</sub> cells, and CD8<sup>+</sup> T-cells of HIV progressors.

**Table S5.** Ingenuity Pathway Analysis of differentially expressed genes in pre-treatment AML patients relative to healthy controls.

**Table S6.** Ingenuity Pathway Analysis of differentially expressed genes in CR relative to NR AML patients post induction chemotherapy.

**Table S7.** Characteristics of AML patients-summary.

**Table S8.** Detailed clinical information on AML patients.

**Table S9.** Statistical comparison of CD8<sup>+</sup> T-cell differentiation subsets in PB and BM, before and after treatment.

**Table S10.** Antibodies used for flow cytometric analyses.

## **SUPPLEMENTARY METHODS**

### ***Quantitative real-time polymerase chain reaction***

RNA was isolated and purified from sorted PB CD3<sup>+</sup>CD8<sup>+</sup> T-cells and total RNA was amplified using the NuGEN™ Ovation Pico WTA system. cDNA was pre-amplified with the TaqMan PreAmp Master Mix Kit (Thermo Fisher Scientific) using manufacturer's protocol. Relative target gene expression was determined by multiplexed qPCR using an Applied Biosystems (ABI) StepOnePlus System. Samples were run in duplicate using primer/probe sets for the FAM-labeled target genes and GAPDH as endogenous control. The TaqMan primer/probe sets [Hs01007422\_m1, (CD28), Hs01013469\_m1 (CCR7), Hs00163934\_m1 (CD40LG), Hs00172872\_m1 (EOMES), Hs00195153\_m1 (KLRG1), Hs00894392\_m1 (TBX21), Hs00188051\_m1(GZMB), and Hs02786624\_g1 (GAPDH)] and other ABI reagents were from Thermo Fisher Scientific. Expression relative to the housekeeping gene GAPDH was determined and log<sub>2</sub> fold changes of patients relative to the mean of HC samples were calculated.

### ***viSNE and CITRUS bioinformatics tools***

viSNE analysis was performed as previously published by Amir et al. (1). Samples included in the analysis were gated and exported as separate .fcs files including only CD8<sup>+</sup> T-cells using flowjo v10, and imported into the CYT tool. The measured fluorescence intensity data of the samples were transformed using the arcsin function with a co-factor of 150. Randomly generated subsamples were extracted from each sample to adjust all groups of samples to include the same number of events, and thus make the groups comparable (the number of cells extracted for analysis from each sample varied between analyses, depending on the size of the included samples, from 600-2500 cells/sample).

The CITRUS tool was used as previously described (2). The CITRUS tool associates clusters of phenotypically similar cells with group-related parameters. Hierarchical clustering is performed using Ward's linkage and Euclidean distance. Cells were clustered based on the fluorescence intensity of the markers. The fluorescence intensity data were transformed using the arcsin function with a co-factor of 150, as instructed for flow cytometry in the software instruction. Repeated re-analysis with identical parameters confirmed that the results were reproducible. One thousand events were sampled from each patient sample for clustering. Minimum cluster size was 5% of all cells. Associations between groups and cluster properties were then identified using the SAM quantitative method (3).

### ***Statistical and data analysis***

For *in vitro* studies, log-scale mean percentages of CD8<sup>+</sup> T-cells expressing each marker were calculated using standard- and mixed-effects linear regression models, and interaction for the effect of IL-2 and blasts between the AML patients and HC group was assessed. For T-cell expansion analysis, differences in log-scale fold-changes were calculated using the MLME framework. Specifically, log-scale fold-changes were included as dependent terms in linear regression models that included fixed effects for the difference of interest (cell type, agent, time point or sample) with random intercept for the subject to account for clustering. Ninetyfive percent confidence intervals for fold changes on the natural scale were obtained by exponentiating confidence intervals obtained from regression models on the logarithmic scale. For specific comparisons of interest between time points, cell types and/or agents, appropriate contrasts of the regression parameter estimates were derived. The mixed effects modelling and standard linear regression modelling were completed using R version 3.3.2. The IRs' co-expression was analyzed with SPICE software version 5.3 (4). Heatmaps were created with Morpheus (<https://software.broadinstitute.org/morpheus/>) or CIMminer (<https://discover.nci.nih.gov/cimminer/>), using Pearson correlation and average linkage cluster algorithm.

For simple comparisons, data were analyzed with the Mann–Whitney *U* test or an unpaired *t* test when comparing measurements between different groups or with the Wilcoxon sum-rank test or a paired *t* test when comparing measurements between different interventions or time points in the same group. Mann-Whitney *U* test, Wilcoxon sum-rank test or *t* test results are reported in the text, and are shown in the figures as indicated. GraphPad Prism 6 (GraphPad Software) was used for data presentation. These analyses were exploratory, and no adjustment was made for multiple comparisons. All *P* values are presented for descriptive purpose only.

### ***Gene expression analyses***

Data were preprocessed and normalized by the Robust Multiarray Average (RMA) method and log<sub>2</sub> transformed. Significant DEGs were detected using the R/Bioconductor package *limma*. *P* values were adjusted for multiple testing based on the FDR according to the Benjamini-Hochberg approach. The significant DEGs were selected based on a log<sub>2</sub> fold change (Log<sub>2</sub>FC)

>1 between patient and HC and FDR < 0.1 (or  $P < 0.01$ ,  $P < 0.05$  where stated). Annotation was directly assessed from Affymetrix and only probe sets with RefSeq annotation (NM\_) and with interquartile range IQR > 0.8 across all samples were considered. For probe sets with identical gene annotations the one with the smallest  $P$  value was selected. Based on these criteria, data were further analyzed using ClueGO (5) and genes were queried for gene ontology biological and immune system process terms (<http://www.geneontology.org/>). For gene ontology network analysis, the option GO Term fusion was used, at least 3% of genes have to be included for the respective GO term with FDR < 0.05, and GO terms (nodes in the network) were connected if they shared genes with kappa score > 0.4. Differentially regulated genes ( $\log_2FC > 1$ ) were also analyzed for specific cellular pathways using IPA (QIAGEN) using a fold change filter of  $|2|$  and  $P < 0.05$ . Briefly, the software calculates both an overlap  $P$  value (based on Fisher's exact test) and an activation z score, which is based on the expression state of activating and inhibiting genes, and takes the directional effect of one molecule on another molecule into account. GSEA (<http://software.broadinstitute.org/gsea/index.jsp>) (6) was used on pre-ranked lists (based on  $\log_2FC$ ) to assess whether an *a priori* defined gene set was significantly enriched at the top or the bottom of the list. Enrichment was considered significant if it had a  $|NES| > 2$ , and FDR (q-value) < 0.1. Heatmap visualization and hierarchical clustering were performed using Genesis (7), and all other gene expression analyses were performed using R.

# Supplementary Figure 1

**A**

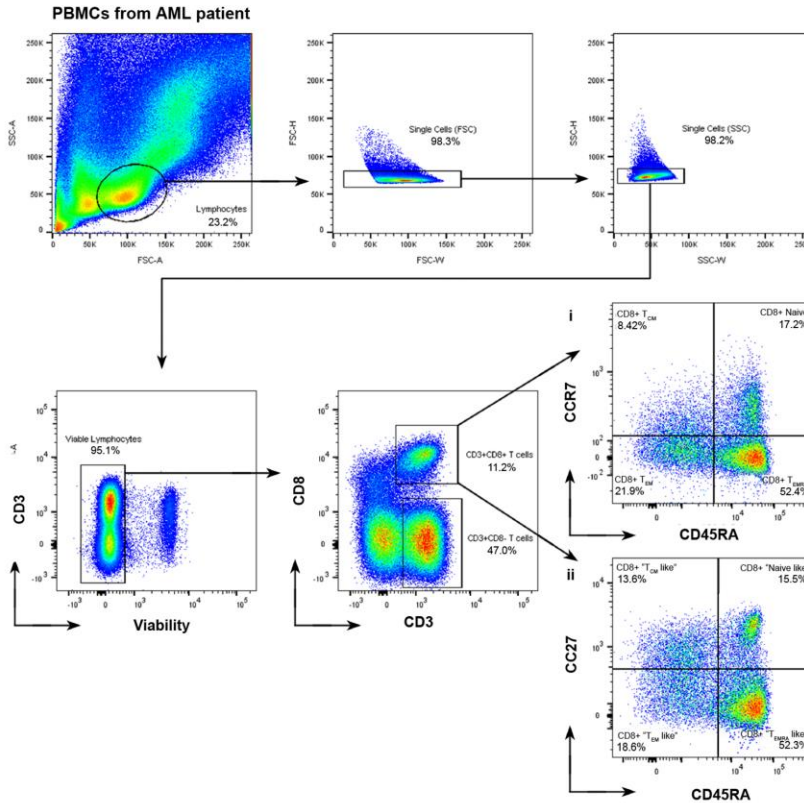

**B**

**Cytokine expression (MFI) on total CD8<sup>+</sup> T cells**

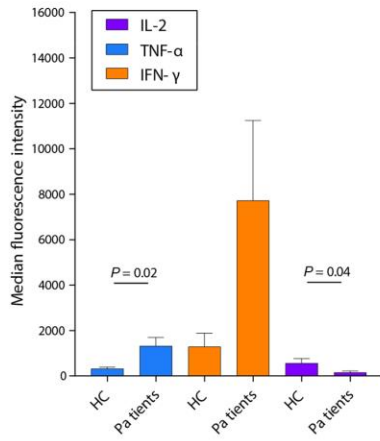

**C**

**Cytokine expression (MFI) on total CD8<sup>+</sup>CD57<sup>+</sup> T cells**

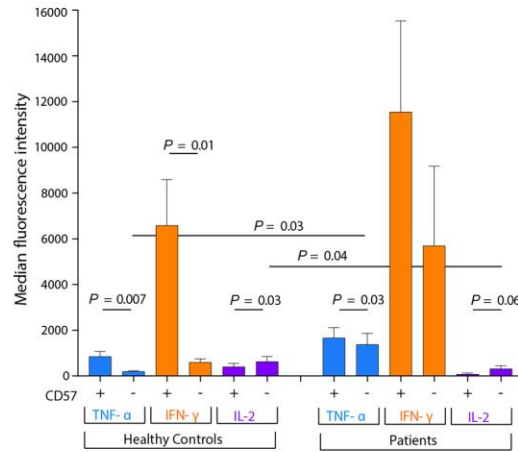

**D**

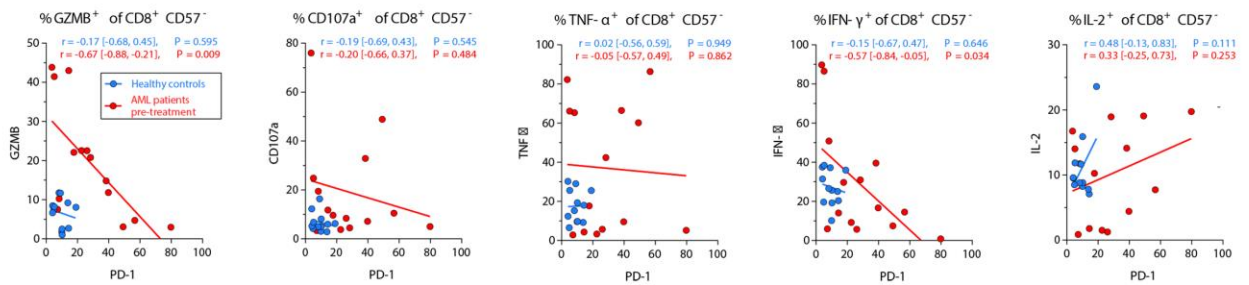

**Fig. S1. Gating strategy and cytokine production by AML CD8<sup>+</sup> T-cells.** (A) Gating of AML CD8<sup>+</sup> T-cell subsets (i) based on the expression of CD45RA and CCR7: naïve (CCR7<sup>+</sup>CD45RA<sup>+</sup>), central memory (T<sub>CM</sub>, CCR7<sup>+</sup>CD45RA<sup>-</sup>), effector memory (T<sub>EM</sub>, CCR7<sup>-</sup>CD45RA<sup>-</sup>), and terminally differentiated effector cells (T<sub>EMRA</sub>, CCR7<sup>-</sup>CD45RA<sup>+</sup>); and (ii) based on the expression of CD45RA and CD27: “naïve-like” (CD27<sup>+</sup>CD45RA<sup>+</sup>), “T<sub>CM</sub>-like” (CD27<sup>+</sup>CD45RA<sup>-</sup>), “T<sub>EM</sub>-like” (CD27<sup>-</sup>CD45RA<sup>-</sup>), and “T<sub>EMRA</sub>-like” (CD27<sup>-</sup>CD45RA<sup>+</sup>). (B) MFI of cytokines expression (TNF- $\alpha$ , IFN- $\gamma$ , and IL-2) on CD8<sup>+</sup> T-cells after 4 hours of *in vitro* stimulation with PMA/ionomycin; HC ( $n = 12$ ) and newly diagnosed AML patients ( $n = 14$ ).  $P$  values were calculated by unpaired  $t$ -test. Bar graphs show means  $\pm$  SEM. (C) CD8<sup>+</sup> T-cells from (B) were divided into two populations according to CD57 expression and the MFI of cytokine expression was assessed separately for HC and AML patients.  $P$  values were calculated using paired- or unpaired  $t$ -test. Bar graphs show means  $\pm$  SEM. (D) Nonlinear regression (curve fit) of PD-1 expression was correlated with the expression of effector molecules (GZMB, CD107a) and cytokines (TNF- $\alpha$ , IFN- $\gamma$ , IL-2) on CD8<sup>+</sup>CD57<sup>-</sup> T-cells.

## Supplementary Figure 2

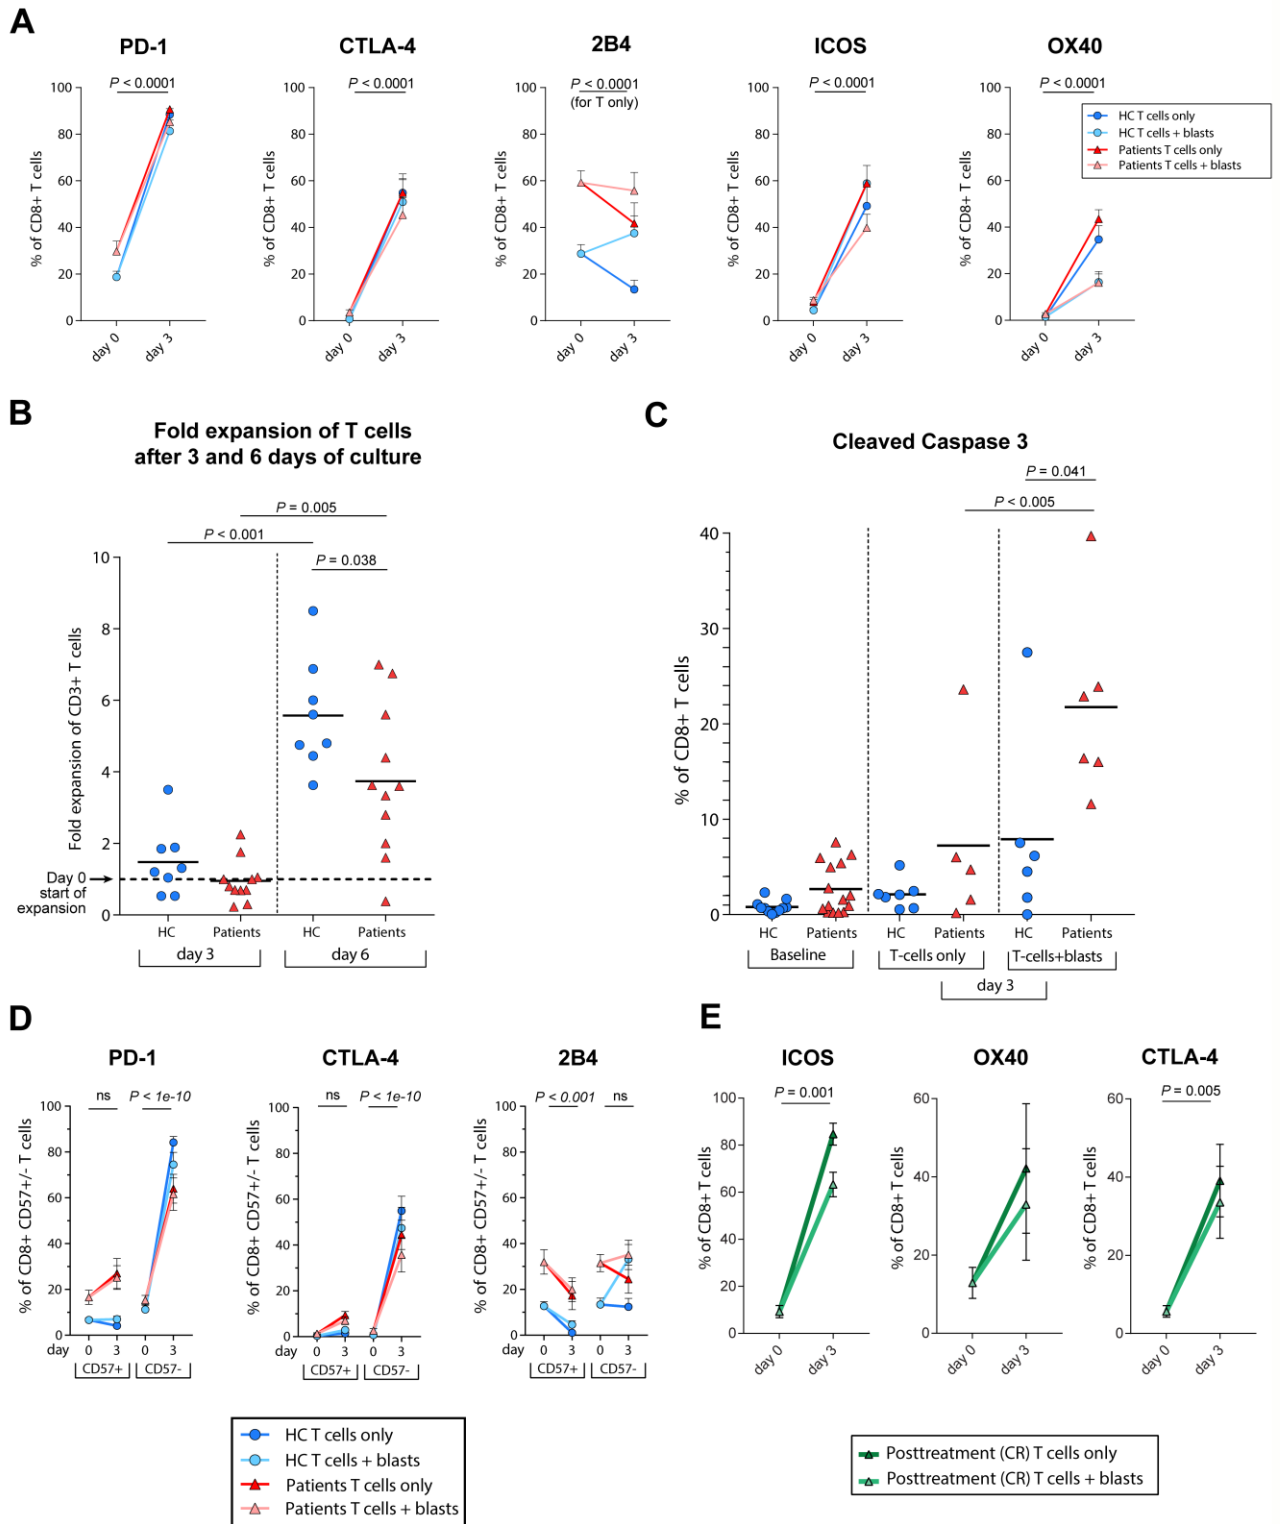



**Fig. S2. AML blasts affect co-signaling molecules expression, expansion, and apoptosis of CD8<sup>+</sup> T-cells.** (A) Change in the percentages of PB CD8<sup>+</sup> T-cells expressing co-signaling receptors (PD-1, CTLA-4, 2B4, ICOS, OX40) from day 0 to day +3 after *in vitro* stimulation with anti-CD3/CD28 beads in the presence or absence of AML blasts, for HC ( $n = 15$ ) and AML patients ( $n = 20$ ).  $P$  values were calculated using linear mixed effects regression models. (B) Fold expansion of HC and AML patients CD3<sup>+</sup> T-cells on days 3 and 6 after stimulation. Dashed line represents cell count on day 0.  $P$  values were calculated using Mann–Whitney  $U$  test (HC versus AML) and Wilcoxon signed-rank test (day 3 versus day 6). (C) Percentage of HC and AML patients PB CD8<sup>+</sup> T-cells expressing cleaved caspases 3 at baseline, and after 3 days of stimulation and culture with or without blasts.  $P$  values were calculated using Mann–Whitney  $U$  test (HC versus AML comparisons) and otherwise by Wilcoxon signed-rank test. (D) CD8<sup>+</sup> T-cells from (A) were divided into two populations according to CD57 expression and the changes of IRs expression were assessed.  $P$  values were calculated using linear mixed effects regression models. (E) CD8<sup>+</sup> T-cells collected from same patients ( $n = 3$ ) at diagnosis and at the time of confirmed CR were stimulated with anti-CD3/CD28 beads in the presence or absence of autologous AML blasts. Change in the percentages of CD8<sup>+</sup> T-cells expressing co-signaling receptors (CTLA-4, ICOS, OX40) from day 0 to day +3 are presented.

# Supplementary Figure 3

**A**

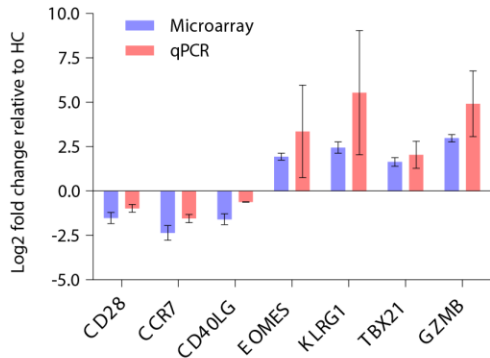

**B**

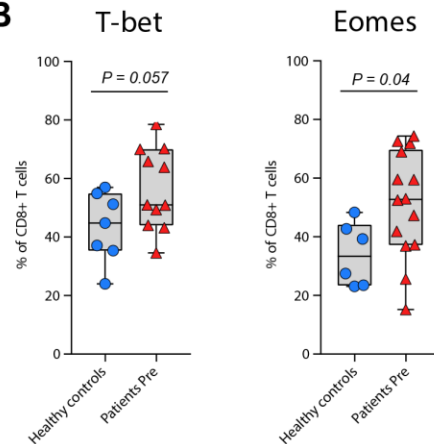

**C**

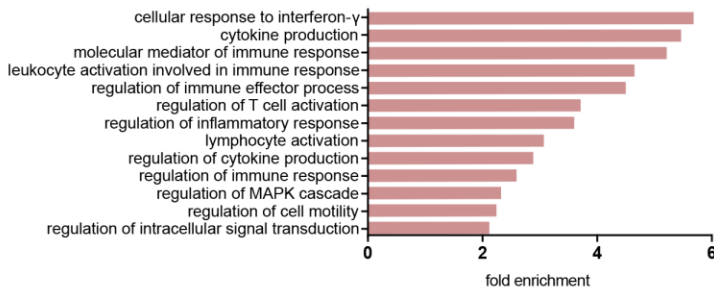

**D**

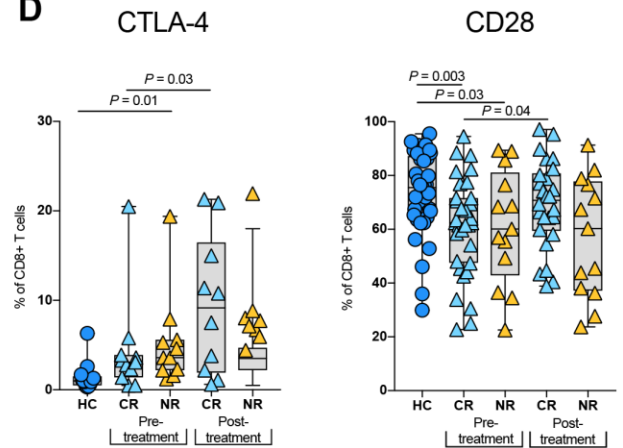

**E**

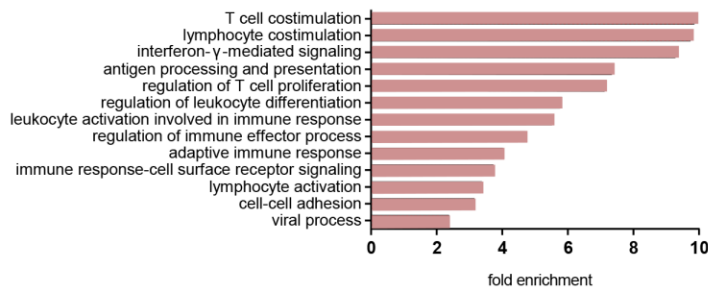

**F**

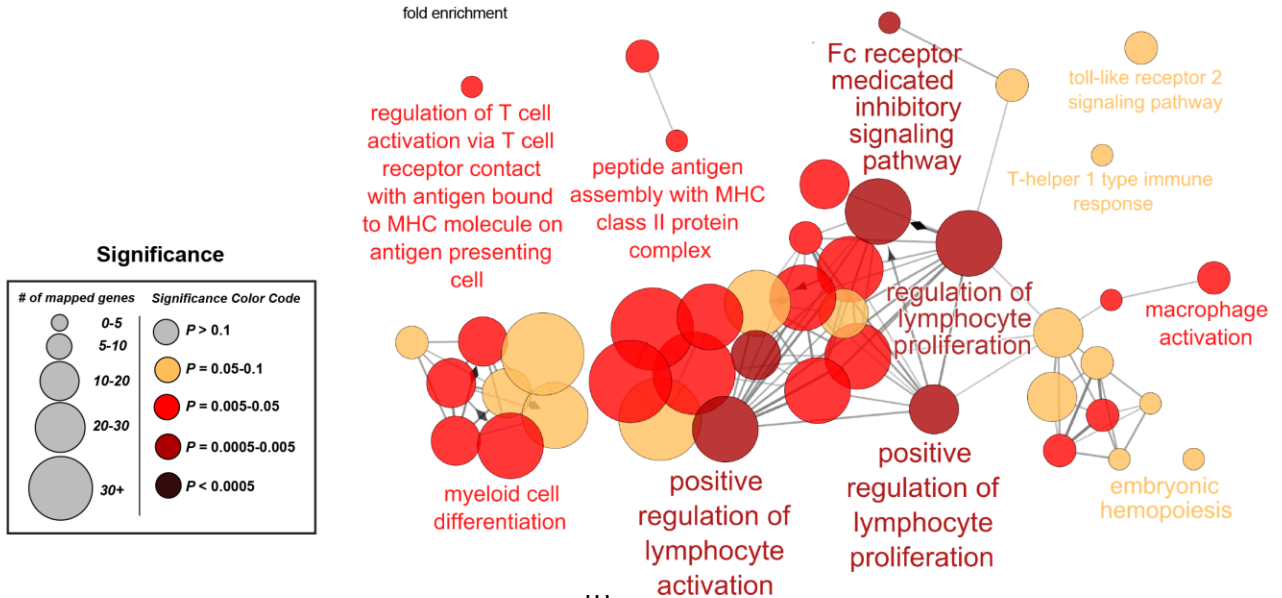

**Fig. S3. Validation of gene expression differences identified by microarray analysis, and gene ontology analysis for pre-treatment AML versus HC and post-treatment AML CR versus NR CD8<sup>+</sup> T-cell comparisons.** (A) Bar graph of qPCR validation of 7 select genes in PB ( $n = 7$ , pink bars) and corresponding microarray gene expression values ( $n = 9$ , blue) from AML patients pre-treatment. Log<sub>2</sub>FC relative to HC ( $n = 4$ ) and data are represented as mean  $\pm$  SEM. (B) PB samples of AML patients at pre-treatment and HC were stained for T-bet and EOMES and examined by flow cytometry. (C) Relative enrichment for GO biological processes (Log<sub>2</sub>FC >1;  $P < 0.05$ ; and >10 genes per process) associated with the top differentially regulated genes ( $P < 0.01$ ) in pre-treatment AML versus HC comparison. (D) PB samples of CR and NR AML patients were stained for CTLA-4 and CD28 expression at pre- and post-treatment. Data are presented as median percentages and interquartile ranges.  $P$  values were calculated using paired or unpaired  $t$  test. (E) Relative enrichment for GO biological processes (Log<sub>2</sub>FC >1;  $P < 0.05$ ; and >10 genes per process) associated with the top differentially regulated genes ( $P < 0.01$ ) in post-treatment AML CR versus NR comparison. (F) GO terms and KEGG/BioCarta pathways ( $P < 0.01$ ) were functionally grouped into a network and interconnected based on the number of shared genes (kappa score > 0.4) using ClueGO. The size of the nodes correlates with the number of mapped genes per term and color correlates with  $P$  values.

# Supplementary Figure 4

**A**

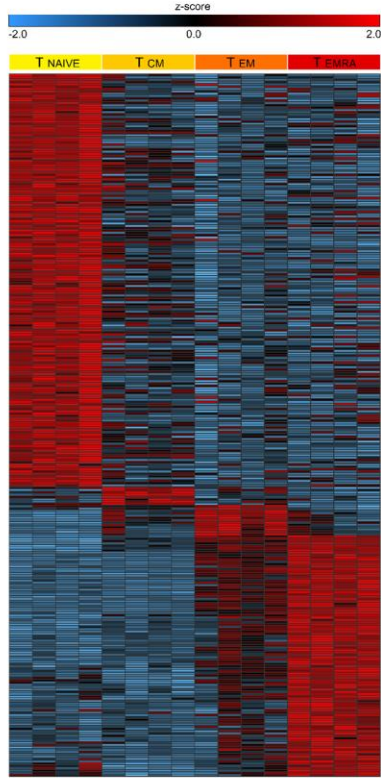

177 genes

8 genes

13 genes

104 genes

Patients pre-treatment vs Healthy Controls

Patients post induction: CR vs NR

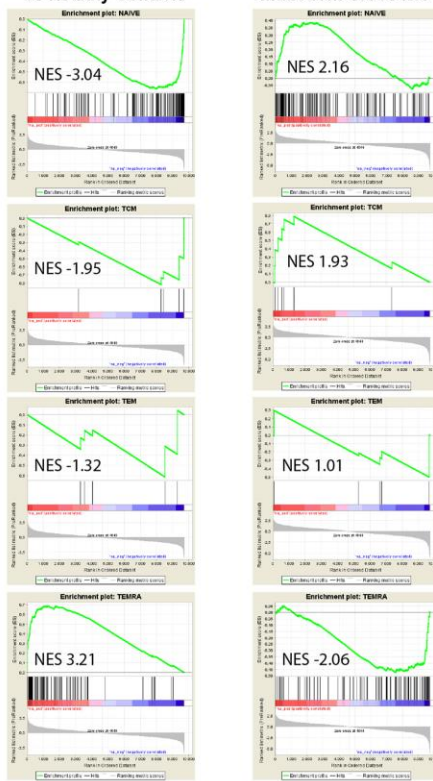

**B**

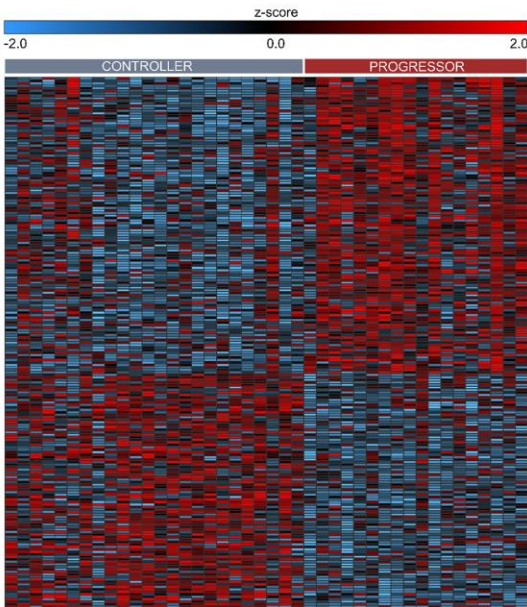

119 genes

94 genes

Patients pre-treatment vs Healthy Controls

Patients post induction: CR vs NR

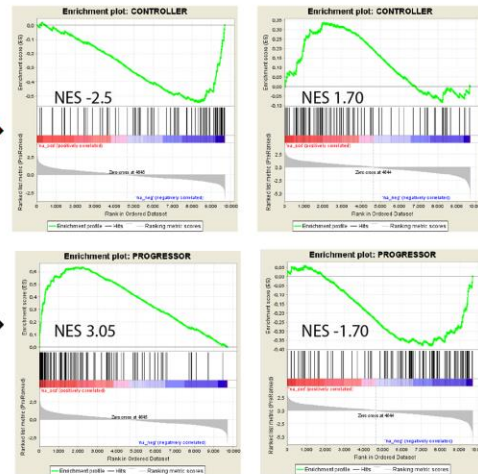

**C**

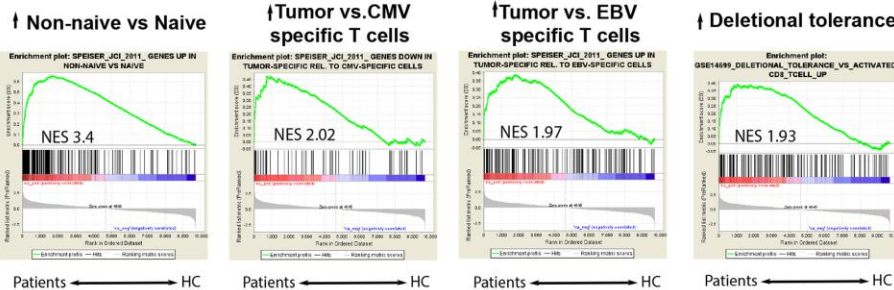

**D**

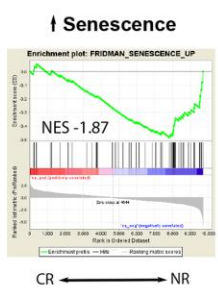

**Fig. S4. Derived gene sets and representative GSEA enrichment plots.** (A and B) Custom gene sets from array data by (A) Willinger et al (8) (ArrayExpress E-TABM-40) based on genes with IQR > 0.6 across all samples and upregulated in the respective group with FC > 1 and FDR < 0.05 compared to each of the other groups, and (B) Quigley et al (9) (GEO GSE24081) based on genes with IQR > 0.5 and  $P < 0.01$ . The identified unique gene sets were applied to AML array data presented here. (C and D) Representative GSEA enrichment plots of select immune-related gene sets overrepresented in (C) pre-treatment and (D) post-treatment analyses from gene sets derived from the MSigDB (Broad Institute).

# Supplementary Figure 5

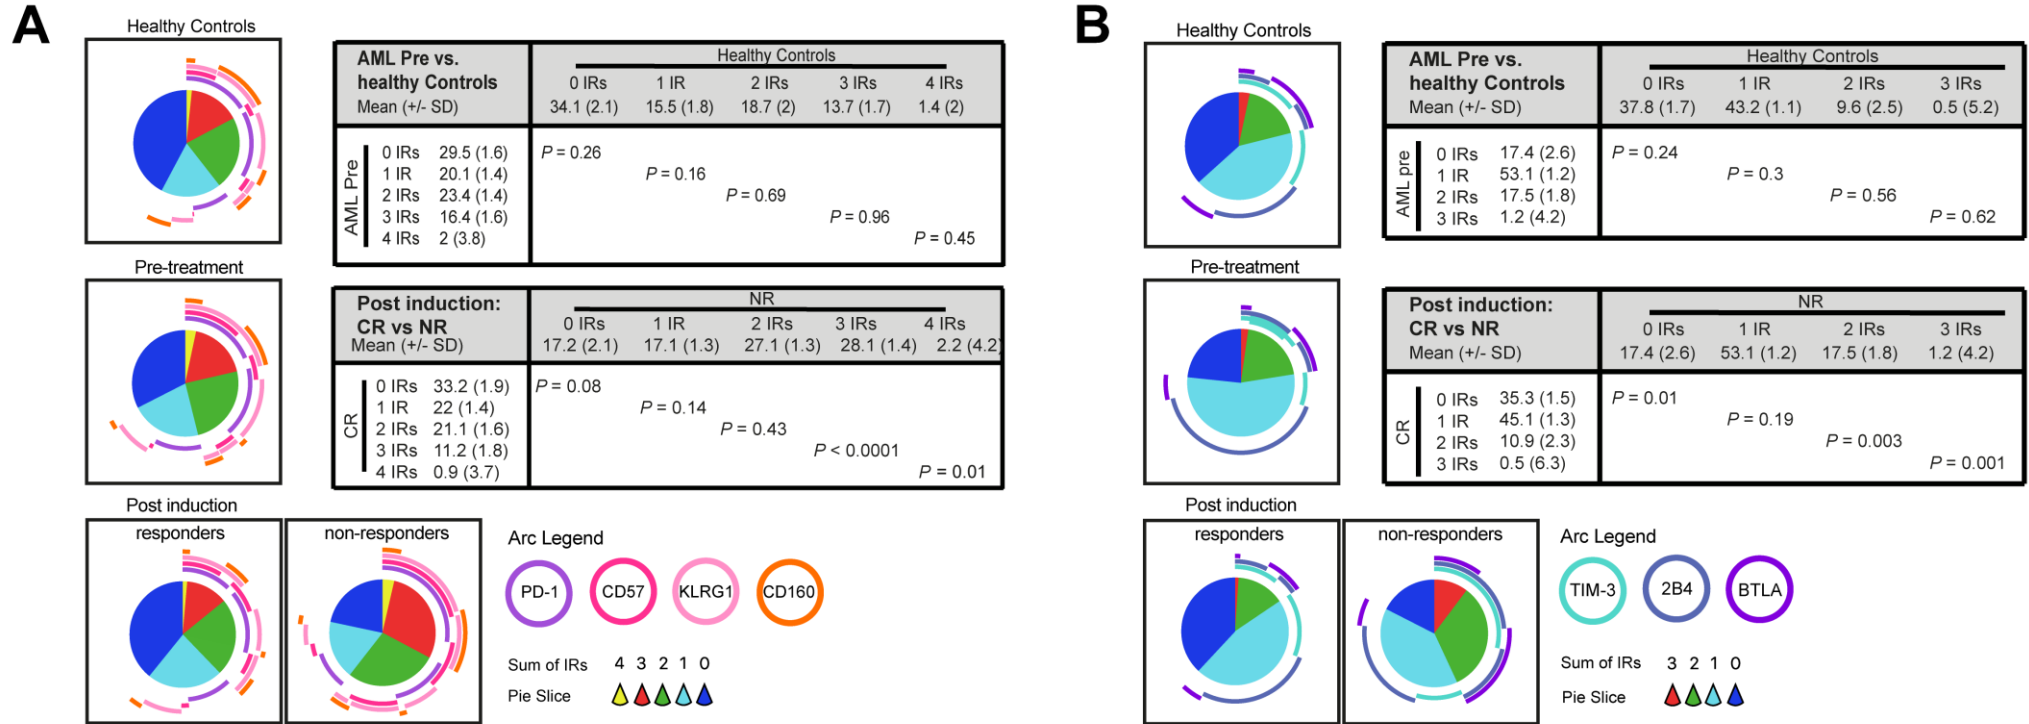

**Fig. S5. Co-expression of IRs in the marrow CD8<sup>+</sup> T-cells from AML patients.** (A and B) Boolean gating analysis of the simultaneous expression of multiple IRs on paired pre- and post-treatment BM CD8<sup>+</sup>CD56<sup>-</sup> T-cells from AML patients ( $n = 29$ ) and HC ( $n = 11$ ). (A) Co-expression of PD-1, CD57, KLRG1, and CD160 (panel 1). (B) Co-expression of Tim3, 2B4, and BTLA (panel 2). Colors of the pie slices depict the number of co-expressed IRs (0-3/4 IRs), while the arcs depict the expression of individual IR. Co-expression was analyzed with SPICE software version 5.3. Mean percentages ( $\pm$  SD) distribution of IR co-expression was compared, and corresponding  $P$  values for the differences in mean co-expression between HC and AML patients pre-treatment and CR versus NR patients post-treatment within categories of the number of co-expressed IRs were calculated using Mann-Whitney  $U$  test and shown in tables.

# Supplementary Figure 6

**A**

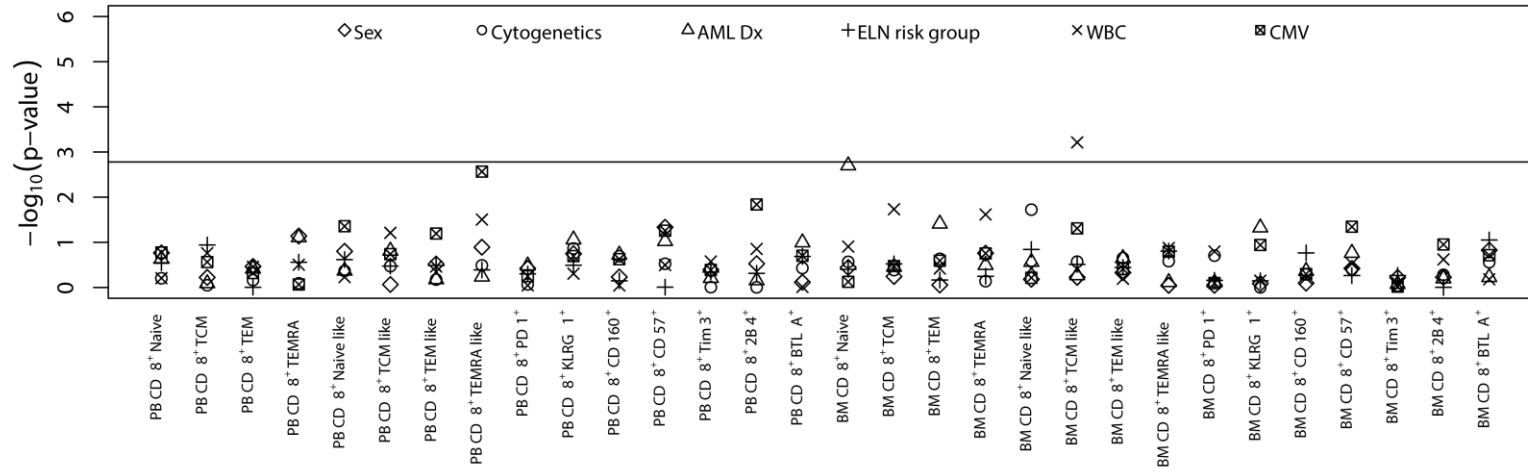

**B**

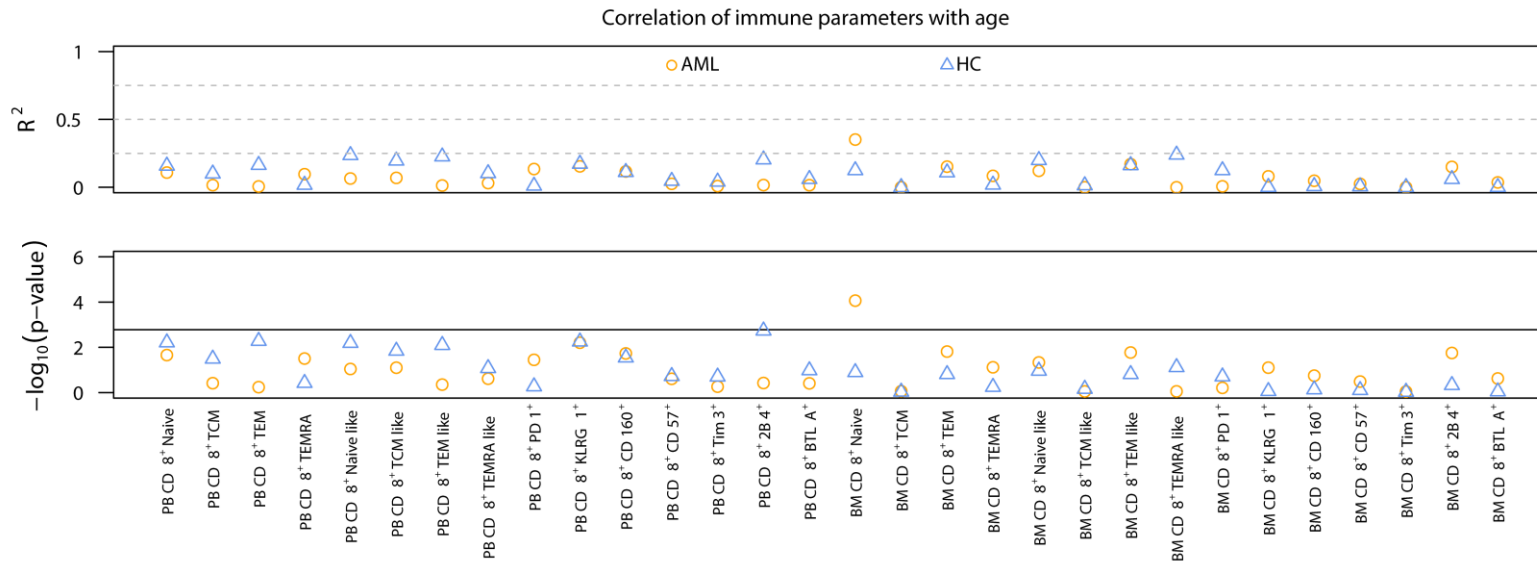

**Fig. S6. Correlation of immune subsets with disease and patient variables.** (A and B) Immune phenotypes of pre-treatment AML patients ( $n = 55$  for PB;  $n = 45$  for BM ) and HC ( $n = 55$  for PB;  $n = 21$  for BM) were analyzed by flow cytometry. (A) The influence of pre-treatment disease (cytogenetic risk group: favorable/intermediate versus adverse; pathogenesis: de novo versus secondary AML; European LeukemiaNet category: adverse/intermediate-2 versus favorable/intermediate-1; WBC count  $\geq$  versus  $< 30,000/\mu\text{l}$ ; percent blast in the PB; percent blast in the BM; absolute PB blast count) and patient variables (CMV status, sex) on T-cell subsets expressing different differentiation, co-IRs and senescence markers. (B) The influence of age on T-cell subsets expressing different differentiation, co-IRs and senescence markers, in AML patients and HC. (A and B) Linear regression models with corresponding  $R^2$  values (top) and  $-\log_{10}$  of Bonferroni-adjusted  $P$  values (significance threshold of  $P < 0.0167$ ) (bottom) for each  $\text{CD8}^+$  T-cell subset.



## Supplementary Figure 7

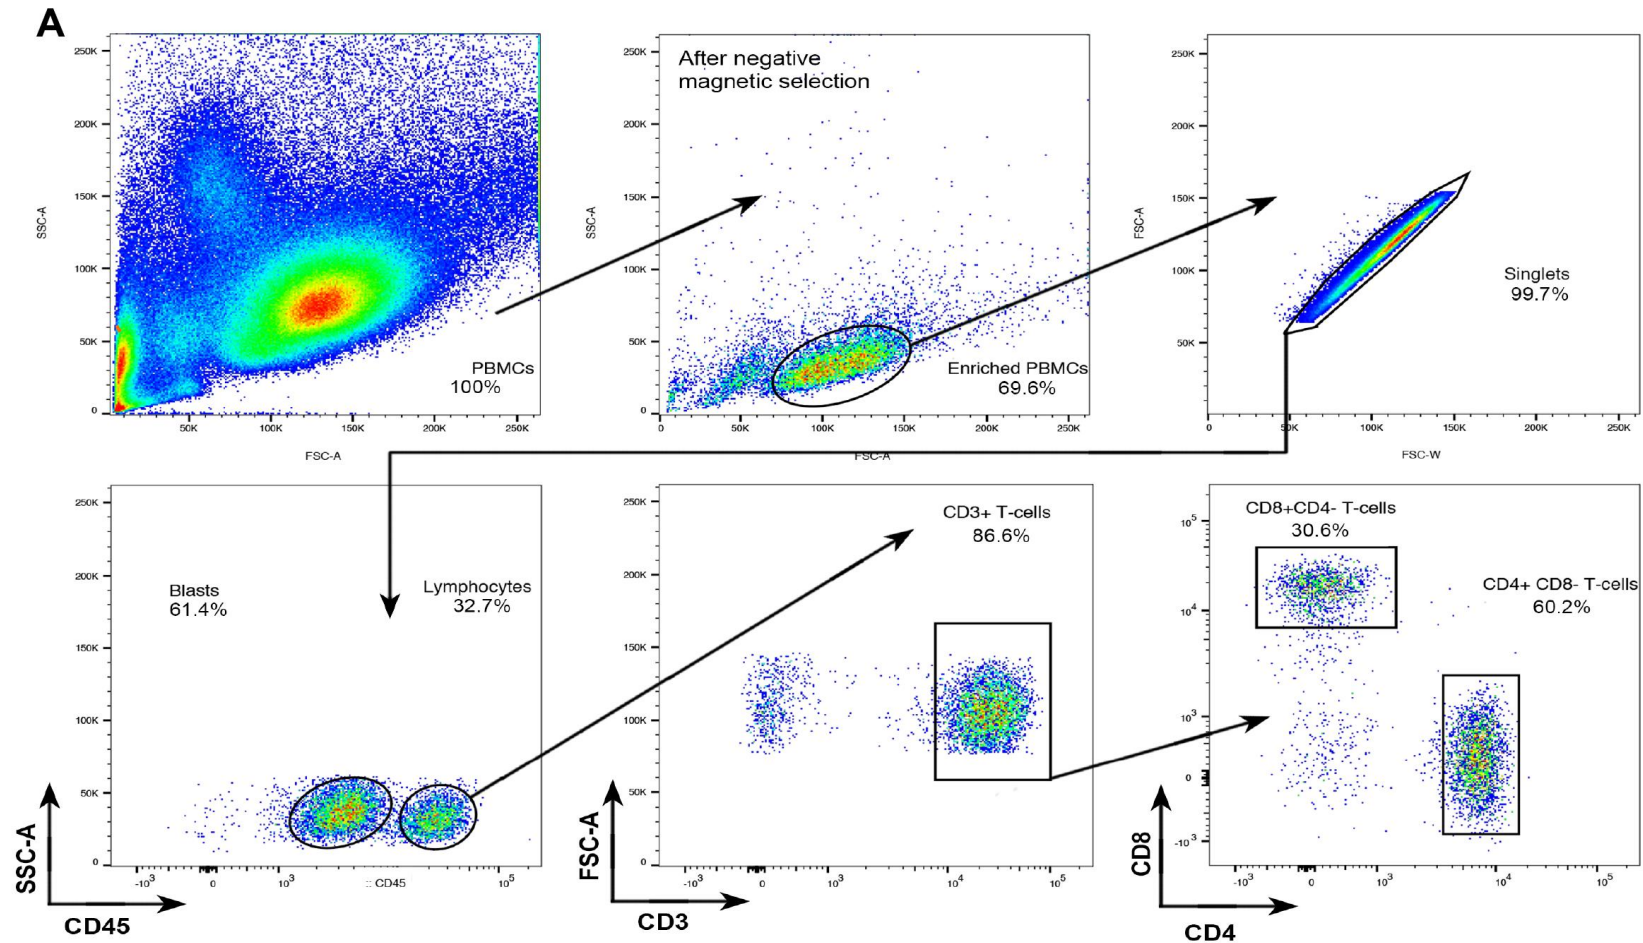

**Fig. S7. Fluorescence activated cell sorting gating strategy for isolation of highly purified CD8<sup>+</sup> T-cells.** T-cells were first separated from PB mononuclear cells by T-cell negative magnetic selection with a custom made kit (Stem Cell Technology) containing Abs against CD33, CD34, CD123, CD11c, and CD36, followed by sorting for CD45<sup>hi</sup> SSC<sup>lo</sup> CD3<sup>+</sup> CD4<sup>-</sup> CD8<sup>+</sup> T-cells.

## TABLES

**Supplementary Table S1.** *Differentially expressed genes in pre-treatment AML patients relative to healthy controls.*

| ID            | NAME                                                                                                          | GENE     | A     | PRE   | HC   | LOG2FC | PVAL    | FDR   |
|---------------|---------------------------------------------------------------------------------------------------------------|----------|-------|-------|------|--------|---------|-------|
| 11735551_a_at | Fc receptor-like 6                                                                                            | FCRL6    | 7.93  | 9.20  | 5.07 | 4.12   | 5.3E-05 | 0.072 |
| 11728480_a_at | janus kinase and microtubule interacting protein 1                                                            | JAKMIP1  | 5.96  | 7.20  | 3.18 | 4.02   | 2.1E-06 | 0.020 |
| 11756847_a_at | chemokine (C-X3-C motif) receptor 1                                                                           | CX3CR1   | 8.67  | 9.85  | 6.00 | 3.85   | 8.5E-04 | 0.093 |
| 11745699_a_at | killer cell lectin-like receptor subfamily F, member 1                                                        | KLRF1    | 8.04  | 9.08  | 5.69 | 3.39   | 1.8E-05 | 0.058 |
| 11757368_x_at | annexin A4                                                                                                    | ANXA4    | 7.50  | 8.52  | 5.20 | 3.32   | 2.8E-04 | 0.079 |
| 11733004_s_at | Fc fragment of IgG, low affinity IIIa, receptor (CD16a)                                                       | FCGR3A   | 9.50  | 10.51 | 7.20 | 3.31   | 3.8E-04 | 0.079 |
| 11722856_a_at | platelet derived growth factor D                                                                              | PDGFD    | 7.11  | 8.06  | 4.96 | 3.10   | 8.1E-05 | 0.075 |
| 11731848_s_at | killer cell lectin-like receptor subfamily C, member 1                                                        | KLRC1    | 8.04  | 8.98  | 5.95 | 3.03   | 4.9E-04 | 0.081 |
| 11724900_a_at | granzyme B (granzyme 2, cytotoxic T-lymphocyte-associated serine esterase 1)                                  | GZMB     | 10.05 | 10.96 | 7.98 | 2.98   | 4.3E-05 | 0.072 |
| 11740478_a_at | Fc receptor-like 3                                                                                            | FCRL3    | 8.25  | 9.17  | 6.19 | 2.98   | 1.4E-03 | 0.113 |
| 11753190_x_at | killer cell immunoglobulin-like receptor, two domains, short cytoplasmic tail, 1                              | KIR2DS1  | 6.66  | 7.57  | 4.62 | 2.96   | 2.9E-03 | 0.146 |
| 11731197_a_at | proline rich 5 like                                                                                           | PRR5L    | 6.35  | 7.25  | 4.32 | 2.93   | 1.4E-04 | 0.076 |
| 11737746_a_at | G protein-coupled receptor 56                                                                                 | GPR56    | 9.09  | 9.99  | 7.08 | 2.91   | 1.3E-04 | 0.076 |
| 11724256_s_at | 2'-5'-oligoadenylate synthetase 1, 40/46kDa                                                                   | OAS1     | 5.64  | 6.49  | 3.74 | 2.75   | 7.3E-03 | 0.190 |
| 11732266_x_at | leukocyte immunoglobulin-like receptor, subfamily B (with TM and ITIM domains), member 1                      | LILRB1   | 6.76  | 7.59  | 4.88 | 2.71   | 5.0E-04 | 0.082 |
| 11754678_a_at | solute carrier family 25, member 43                                                                           | SLC25A43 | 5.50  | 6.33  | 3.65 | 2.69   | 1.8E-03 | 0.120 |
| 11748899_a_at | CD244 molecule, natural killer cell receptor 2B4                                                              | CD244    | 7.06  | 7.88  | 5.22 | 2.66   | 2.3E-03 | 0.138 |
| 11717467_a_at | tetratricopeptide repeat domain 38                                                                            | TTC38    | 6.69  | 7.51  | 4.85 | 2.65   | 4.5E-04 | 0.080 |
| 11732480_s_at | integrin, alpha M (complement component 3 receptor 3 subunit)                                                 | ITGAM    | 8.68  | 9.50  | 6.86 | 2.64   | 2.9E-04 | 0.079 |
| 11736113_at   | Rho GTPase activating protein 18                                                                              | ARHGAP18 | 5.45  | 6.25  | 3.63 | 2.62   | 7.7E-04 | 0.092 |
| 11719671_a_at | regulator of calcineurin 2                                                                                    | RCAN2    | 5.61  | 6.42  | 3.80 | 2.62   | 9.5E-03 | 0.212 |
| 11732809_a_at | prokineticin 2                                                                                                | PROK2    | 6.72  | 7.52  | 4.92 | 2.60   | 4.4E-03 | 0.162 |
| 11758673_s_at | sorbitol dehydrogenase                                                                                        | SORD     | 6.72  | 7.52  | 4.94 | 2.58   | 5.2E-04 | 0.082 |
| 11738094_a_at | ST8 alpha-N-acetyl-neuraminide alpha-2,8-sialyltransferase 6                                                  | ST8SIA6  | 5.45  | 6.24  | 3.67 | 2.57   | 3.9E-03 | 0.155 |
| 11730723_a_at | neural cell adhesion molecule 1                                                                               | NCAM1    | 6.17  | 6.95  | 4.40 | 2.56   | 2.0E-03 | 0.129 |
| 11761050_at   | Homo sapiens Gardner-Rasheed feline sarcoma viral (v-fgr) oncogene homolog (FGR), transcript variant 3, mRNA. | FGR      | 6.40  | 7.18  | 4.66 | 2.52   | 9.5E-06 | 0.046 |
| 11718766_at   | protease, serine, 23                                                                                          | PRSS23   | 6.09  | 6.86  | 4.35 | 2.51   | 1.3E-03 | 0.113 |

|               |                                                                          |          |       |       |      |      |         |       |
|---------------|--------------------------------------------------------------------------|----------|-------|-------|------|------|---------|-------|
| 11755998_x_at | major histocompatibility complex, class II, DR beta 4                    | HLA-DRB4 | 6.13  | 6.90  | 4.40 | 2.50 | 5.3E-03 | 0.169 |
| 11735224_a_at | killer cell lectin-like receptor subfamily G, member 1                   | KLRG1    | 9.05  | 9.80  | 7.36 | 2.45 | 3.9E-04 | 0.079 |
| 11750925_a_at | thymocyte selection-associated high mobility group box                   | TOX      | 6.51  | 7.24  | 4.87 | 2.37 | 1.2E-04 | 0.076 |
| 11739822_a_at | copine VIII                                                              | CPNE8    | 6.78  | 7.51  | 5.14 | 2.37 | 1.4E-04 | 0.076 |
| 11739489_a_at | ATPase, class V, type 10D                                                | ATP10D   | 4.62  | 5.35  | 2.99 | 2.36 | 1.2E-03 | 0.109 |
| 11720830_at   | chromosome 1 open reading frame 21                                       | C1orf21  | 6.28  | 7.00  | 4.66 | 2.33 | 7.1E-04 | 0.090 |
| 11736122_a_at | golgi integral membrane protein 4                                        | GOLIM4   | 6.57  | 7.29  | 4.96 | 2.33 | 3.8E-04 | 0.079 |
| 11757990_s_at | complement factor H                                                      | CFH      | 6.88  | 7.60  | 5.27 | 2.33 | 3.9E-04 | 0.079 |
| 11751899_a_at | discs, large homolog 5 (Drosophila)                                      | DLG5     | 6.49  | 7.19  | 4.90 | 2.29 | 3.0E-05 | 0.072 |
| 11740452_x_at | killer cell lectin-like receptor subfamily D, member 1                   | KLRD1    | 10.36 | 11.06 | 8.78 | 2.28 | 5.9E-04 | 0.083 |
| 11755997_a_at | sterile alpha motif domain containing 9-like                             | SAMD9L   | 8.50  | 9.20  | 6.93 | 2.27 | 4.5E-03 | 0.163 |
| 11736761_at   | caspase recruitment domain family, member 16                             | CARD16   | 8.12  | 8.82  | 6.55 | 2.26 | 8.5E-03 | 0.204 |
| 11736632_at   | apolipoprotein B mRNA editing enzyme, catalytic polypeptide-like 3H      | APOBEC3H | 7.64  | 8.34  | 6.08 | 2.26 | 8.9E-04 | 0.094 |
| 11748062_s_at | chemokine (C-C motif) receptor 5 (gene/pseudogene)                       | CCR5     | 6.00  | 6.69  | 4.44 | 2.25 | 7.2E-04 | 0.090 |
| 11736225_a_at | spermatogenesis associated, serine-rich 2                                | SPATS2   | 6.60  | 7.29  | 5.05 | 2.24 | 3.1E-03 | 0.146 |
| 11727969_a_at | solute carrier family 14 (urea transporter), member 1 (Kidd blood group) | SLC14A1  | 6.50  | 7.19  | 4.95 | 2.24 | 3.4E-04 | 0.079 |
| 11719254_at   | cyclin-dependent kinase 19                                               | CDK19    | 5.25  | 5.94  | 3.71 | 2.22 | 9.0E-04 | 0.094 |
| 11748500_a_at | ectonucleotide pyrophosphatase/phosphodiesterase 5 (putative)            | ENPP5    | 6.03  | 6.71  | 4.50 | 2.22 | 6.2E-03 | 0.180 |
| 11754474_a_at | pleckstrin                                                               | PLEK     | 9.59  | 10.27 | 8.07 | 2.21 | 2.5E-03 | 0.141 |
| 11732781_a_at | NME/NM23 family member 8                                                 | NME8     | 4.82  | 5.50  | 3.31 | 2.19 | 2.7E-03 | 0.145 |
| 11752500_a_at | mannosidase, alpha, class 1A, member 1                                   | MAN1A1   | 8.24  | 8.91  | 6.74 | 2.18 | 1.1E-04 | 0.075 |
| 11757954_s_at | ArfGAP with GTPase domain, ankyrin repeat and PH domain 1                | AGAP1    | 6.75  | 7.42  | 5.25 | 2.17 | 7.0E-03 | 0.187 |
| 11752490_x_at | neuromedin U receptor 1                                                  | NMUR1    | 6.72  | 7.39  | 5.22 | 2.17 | 3.8E-03 | 0.153 |
| 11744374_x_at | major histocompatibility complex, class II, DR beta 1                    | HLA-DRB1 | 8.88  | 9.54  | 7.39 | 2.16 | 1.3E-03 | 0.113 |
| 11728858_at   | centrosomal protein 19kDa                                                | CEP19    | 4.60  | 5.26  | 3.11 | 2.15 | 6.3E-03 | 0.180 |
| 11756106_a_at | SET binding protein 1                                                    | SETBP1   | 5.72  | 6.37  | 4.24 | 2.14 | 9.5E-05 | 0.075 |
| 11717563_a_at | deltex 3 like, E3 ubiquitin ligase                                       | DTX3L    | 7.28  | 7.93  | 5.81 | 2.13 | 3.7E-03 | 0.153 |
| 11745004_x_at | HOP homeobox                                                             | HOPX     | 8.69  | 9.34  | 7.22 | 2.12 | 1.4E-03 | 0.114 |
| 11748798_a_at | phosphoinositide-3-kinase adaptor protein 1                              | PIK3AP1  | 6.63  | 7.28  | 5.18 | 2.10 | 1.7E-03 | 0.120 |
| 11756818_a_at | protein associated with topoisomerase II homolog 2 (yeast)               | PATL2    | 8.00  | 8.65  | 6.55 | 2.10 | 7.1E-04 | 0.090 |
| 11749753_a_at | KIAA1328                                                                 | KIAA1328 | 6.42  | 7.07  | 4.97 | 2.09 | 1.7E-03 | 0.120 |
| 11750960_a_at | aminoadipate-semialdehyde synthase                                       | AASS     | 4.85  | 5.49  | 3.40 | 2.09 | 4.6E-04 | 0.080 |
| 11746537_x_at | eukaryotic translation initiation factor 4 gamma, 3                      | EIF4G3   | 7.53  | 8.18  | 6.09 | 2.09 | 1.3E-03 | 0.113 |
| 11750456_s_at | Rh blood group, CcEe antigens                                            | RHCE     | 4.48  | 5.12  | 3.04 | 2.08 | 4.6E-03 | 0.163 |
| 11739989_a_at | calcineurin-like phosphoesterase domain containing 1                     | CPPED1   | 5.70  | 6.34  | 4.26 | 2.07 | 3.5E-03 | 0.148 |
| 11739553_a_at | growth arrest-specific 7                                                 | GAS7     | 6.62  | 7.25  | 5.21 | 2.04 | 2.4E-03 | 0.139 |

|               |                                                                              |          |       |       |       |      |         |       |
|---------------|------------------------------------------------------------------------------|----------|-------|-------|-------|------|---------|-------|
| 11729338_x_at | proline-serine-threonine phosphatase interacting protein 2                   | PSTPIP2  | 6.23  | 6.85  | 4.83  | 2.03 | 4.4E-03 | 0.162 |
| 11751857_a_at | granulysin                                                                   | GNLY     | 11.97 | 12.59 | 10.58 | 2.02 | 2.1E-03 | 0.132 |
| 11736229_a_at | cysteine rich transmembrane BMP regulator 1 (chordin-like)                   | CRIM1    | 6.15  | 6.77  | 4.76  | 2.01 | 3.6E-03 | 0.151 |
| 11755251_x_at | fatty acid desaturase 1                                                      | FADS1    | 5.91  | 6.53  | 4.53  | 2.00 | 1.1E-03 | 0.107 |
| 11720597_s_at | cysteine-serine-rich nuclear protein 2                                       | CSRNP2   | 6.00  | 6.62  | 4.62  | 1.99 | 8.8E-05 | 0.075 |
| 11754601_s_at | spondin 2, extracellular matrix protein                                      | SPON2    | 8.75  | 9.36  | 7.38  | 1.98 | 1.1E-03 | 0.107 |
| 11723698_a_at | 2'-5'-oligoadenylate synthetase 3, 100kDa                                    | OAS3     | 6.35  | 6.95  | 5.00  | 1.95 | 9.6E-03 | 0.212 |
| 11750731_a_at | eomesodermin                                                                 | EOMES    | 7.11  | 7.71  | 5.77  | 1.93 | 3.9E-03 | 0.155 |
| 11757914_a_at | lysine-rich nucleolar protein 1                                              | KNOP1    | 5.60  | 6.20  | 4.26  | 1.93 | 3.4E-03 | 0.148 |
| 11753685_a_at | angiotensin II receptor-associated protein                                   | AGTRAP   | 6.01  | 6.60  | 4.67  | 1.93 | 5.0E-03 | 0.167 |
| 11728125_a_at | granzyme H (cathepsin G-like 2, protein h-CCPX)                              | GZMH     | 11.34 | 11.94 | 10.01 | 1.93 | 5.6E-04 | 0.082 |
| 11761683_x_at | pyrin and HIN domain family, member 1                                        | PYHIN1   | 5.95  | 6.54  | 4.62  | 1.92 | 2.6E-03 | 0.143 |
| 11754627_s_at | RAB37, member RAS oncogene family                                            | RAB37    | 8.72  | 9.31  | 7.39  | 1.92 | 7.7E-04 | 0.092 |
| 11739972_at   | NUAK family, SNF1-like kinase, 1                                             | NUAK1    | 4.12  | 4.71  | 2.79  | 1.92 | 3.1E-03 | 0.146 |
| 11747113_a_at | CD160 molecule                                                               | CD160    | 7.46  | 8.04  | 6.14  | 1.91 | 4.3E-03 | 0.161 |
| 11715258_s_at | parathymosin                                                                 | PTMS     | 8.85  | 9.44  | 7.53  | 1.91 | 5.4E-04 | 0.082 |
| 11717863_a_at | dual specificity phosphatase 5                                               | DUSP5    | 7.83  | 8.41  | 6.52  | 1.90 | 2.1E-03 | 0.133 |
| 11735204_a_at | methylmalonic aciduria (cobalamin deficiency) cblA type                      | MMAA     | 6.99  | 7.57  | 5.68  | 1.89 | 8.7E-03 | 0.204 |
| 11731425_at   | chemokine (C-X-C motif) receptor 2                                           | CXCR2    | 5.49  | 6.07  | 4.19  | 1.88 | 6.8E-03 | 0.185 |
| 11718084_a_at | LYN proto-oncogene, Src family tyrosine kinase                               | LYN      | 6.51  | 7.08  | 5.23  | 1.86 | 3.4E-03 | 0.148 |
| 11730296_a_at | toll-like receptor 3                                                         | TLR3     | 5.28  | 5.85  | 3.99  | 1.85 | 2.6E-04 | 0.079 |
| 11729139_x_at | SLAM family member 7                                                         | SLAMF7   | 8.65  | 9.22  | 7.37  | 1.85 | 1.9E-03 | 0.128 |
| 11718081_a_at | ATPase, Ca <sup>++</sup> transporting, plasma membrane 4                     | ATP2B4   | 8.24  | 8.80  | 6.97  | 1.83 | 1.6E-03 | 0.120 |
| 11753788_x_at | cyclin-dependent kinase inhibitor 3                                          | CDKN3    | 4.47  | 5.03  | 3.20  | 1.83 | 6.3E-04 | 0.086 |
| 11725506_s_at | growth differentiation factor 11                                             | GDF11    | 7.09  | 7.65  | 5.83  | 1.82 | 2.0E-04 | 0.079 |
| 11747295_a_at | perforin 1 (pore forming protein)                                            | PRF1     | 10.08 | 10.64 | 8.81  | 1.82 | 7.4E-04 | 0.091 |
| 11743398_s_at | STARD3 N-terminal like                                                       | STARD3NL | 6.85  | 7.41  | 5.61  | 1.80 | 1.5E-03 | 0.116 |
| 11734902_a_at | cytochrome P450, family 4, subfamily V, polypeptide 2                        | CYP4V2   | 7.90  | 8.45  | 6.66  | 1.79 | 5.0E-03 | 0.167 |
| 11717935_a_at | endoplasmic reticulum metalloproteinase 1                                    | ERMP1    | 8.06  | 8.61  | 6.82  | 1.79 | 2.8E-03 | 0.145 |
| 11731629_a_at | missing oocyte, meiosis regulator, homolog (Drosophila)                      | MIOS     | 7.40  | 7.95  | 6.16  | 1.78 | 8.6E-04 | 0.093 |
| 11717844_x_at | ethanolamine kinase 1                                                        | ETNK1    | 7.87  | 8.41  | 6.63  | 1.78 | 3.3E-03 | 0.148 |
| 11742639_a_at | RAD52 motif containing 1                                                     | RDM1     | 4.54  | 5.08  | 3.31  | 1.78 | 5.5E-03 | 0.172 |
| 11720496_at   | granzyme A (granzyme 1, cytotoxic T-lymphocyte-associated serine esterase 3) | GZMA     | 11.19 | 11.73 | 9.96  | 1.78 | 4.1E-03 | 0.159 |
| 11735270_a_at | glucosaminyl (N-acetyl) transferase 1, core 2                                | GCNT1    | 5.77  | 6.32  | 4.55  | 1.77 | 2.0E-03 | 0.129 |
| 11762067_at   | FCF1 rRNA-processing protein                                                 | FCF1     | 6.71  | 7.25  | 5.48  | 1.77 | 7.4E-03 | 0.192 |
| 11728389_at   | tetraspanin 2                                                                | TSPAN2   | 4.66  | 5.20  | 3.44  | 1.76 | 7.9E-03 | 0.199 |

|               |                                                                                   |           |       |       |       |      |         |       |
|---------------|-----------------------------------------------------------------------------------|-----------|-------|-------|-------|------|---------|-------|
| 11734395_x_at | killer cell lectin-like receptor subfamily C, member 3                            | KLRC3     | 8.17  | 8.71  | 6.95  | 1.76 | 3.7E-03 | 0.152 |
| 11740297_a_at | chromosome 10 open reading frame 128                                              | C10orf128 | 7.79  | 8.33  | 6.57  | 1.76 | 8.9E-03 | 0.206 |
| 11717820_a_at | solute carrier family 4 (sodium bicarbonate cotransporter), member 4              | SLC4A4    | 4.01  | 4.55  | 2.80  | 1.76 | 6.6E-04 | 0.087 |
| 11717035_s_at | KIAA0141                                                                          | KIAA0141  | 7.04  | 7.58  | 5.84  | 1.74 | 4.5E-03 | 0.163 |
| 11732379_a_at | decapping exoribonuclease                                                         | DXO       | 7.86  | 8.39  | 6.66  | 1.73 | 4.3E-04 | 0.079 |
| 11728712_x_at | ZFP64 zinc finger protein                                                         | ZFP64     | 5.97  | 6.50  | 4.78  | 1.73 | 9.7E-03 | 0.212 |
| 11747018_x_at | multiple C2 domains, transmembrane 2                                              | MCTP2     | 7.11  | 7.64  | 5.91  | 1.73 | 5.8E-03 | 0.177 |
| 11726329_x_at | guanylate binding protein 1, interferon-inducible                                 | GBP1      | 7.30  | 7.83  | 6.11  | 1.72 | 2.3E-03 | 0.138 |
| 11756287_a_at | acyloxyacyl hydrolase (neutrophil)                                                | AOAH      | 8.87  | 9.40  | 7.68  | 1.72 | 7.4E-04 | 0.091 |
| 11751136_a_at | coiled-coil domain containing 30                                                  | CCDC30    | 5.03  | 5.56  | 3.84  | 1.72 | 9.1E-04 | 0.094 |
| 11726916_at   | solute carrier organic anion transporter family, member 4C1                       | SLCO4C1   | 5.94  | 6.47  | 4.75  | 1.72 | 6.2E-03 | 0.180 |
| 11744799_a_at | X-ray repair complementing defective repair in Chinese hamster cells 4            | XRCC4     | 4.63  | 5.16  | 3.44  | 1.72 | 9.7E-03 | 0.212 |
| 11758050_s_at | regulator of G-protein signaling 3                                                | RGS3      | 7.46  | 7.99  | 6.27  | 1.71 | 3.6E-03 | 0.151 |
| 11720994_x_at | chemokine (C-C motif) ligand 3                                                    | CCL3      | 9.01  | 9.54  | 7.83  | 1.71 | 3.2E-03 | 0.148 |
| 11759141_at   | huntingtin interacting protein 1                                                  | HIP1      | 5.00  | 5.52  | 3.81  | 1.71 | 7.9E-04 | 0.093 |
| 11724042_a_at | PDZ domain containing 4                                                           | PDZD4     | 9.01  | 9.53  | 7.82  | 1.71 | 4.3E-03 | 0.161 |
| 11743458_a_at | family with sequence similarity 49, member A                                      | FAM49A    | 7.01  | 7.52  | 5.84  | 1.68 | 2.9E-04 | 0.079 |
| 11720510_a_at | apolipoprotein B mRNA editing enzyme, catalytic polypeptide-like 3G               | APOBEC3G  | 9.85  | 10.37 | 8.68  | 1.68 | 5.2E-03 | 0.168 |
| 11719313_a_at | family with sequence similarity 111, member A                                     | FAM111A   | 7.67  | 8.18  | 6.50  | 1.68 | 4.1E-03 | 0.159 |
| 11752664_a_at | sphingosine-1-phosphate receptor 5                                                | S1PR5     | 10.25 | 10.77 | 9.09  | 1.68 | 5.2E-03 | 0.168 |
| 11725641_at   | EF-hand domain family, member D2                                                  | EFHD2     | 9.58  | 10.09 | 8.42  | 1.67 | 1.9E-03 | 0.127 |
| 11723194_x_at | major histocompatibility complex, class II, DQ beta 1                             | HLA-DQB1  | 9.12  | 9.63  | 7.97  | 1.67 | 2.1E-03 | 0.133 |
| 11722782_at   | fibroblast growth factor binding protein 2                                        | FGFBP2    | 11.32 | 11.84 | 10.17 | 1.66 | 2.8E-03 | 0.145 |
| 11762018_at   | DNA cross-link repair 1C                                                          | DCLRE1C   | 4.63  | 5.14  | 3.49  | 1.66 | 4.4E-03 | 0.162 |
| 11721421_s_at | RAP1 GTPase activating protein 2                                                  | RAP1GAP2  | 8.77  | 9.28  | 7.63  | 1.65 | 6.7E-03 | 0.184 |
| 11751714_a_at | testis-specific kinase 2                                                          | TESK2     | 5.99  | 6.49  | 4.84  | 1.65 | 2.6E-03 | 0.143 |
| 11736843_a_at | killer cell lectin-like receptor subfamily A pseudogene 1                         | KLRAP1    | 5.44  | 5.95  | 4.31  | 1.64 | 1.4E-03 | 0.113 |
| 11724683_a_at | CD300a molecule                                                                   | CD300A    | 9.23  | 9.73  | 8.09  | 1.64 | 6.3E-03 | 0.180 |
| 11739979_a_at | A kinase (PRKA) anchor protein 2                                                  | AKAP2     | 9.35  | 9.86  | 8.22  | 1.64 | 9.2E-04 | 0.094 |
| 11732538_at   | T-box 21                                                                          | TBX21     | 9.13  | 9.63  | 8.00  | 1.64 | 3.7E-03 | 0.152 |
| 11736718_a_at | neurocalcin delta                                                                 | NCALD     | 7.15  | 7.66  | 6.03  | 1.63 | 9.7E-03 | 0.212 |
| 11757926_s_at | solute carrier family 9, subfamily A (NHE9, cation proton antiporter 9), member 9 | SLC9A9    | 6.29  | 6.79  | 5.16  | 1.63 | 3.8E-03 | 0.153 |
| 11732555_at   | Fas ligand (TNF superfamily, member 6)                                            | FASLG     | 5.38  | 5.88  | 4.26  | 1.62 | 1.7E-03 | 0.120 |
| 11745775_a_at | lipase A, lysosomal acid, cholesterol esterase                                    | LIPA      | 6.79  | 7.29  | 5.67  | 1.62 | 8.0E-03 | 0.200 |
| 11761636_at   | SLAM family member 6                                                              | SLAMF6    | 7.38  | 7.87  | 6.26  | 1.61 | 9.2E-03 | 0.210 |

|               |                                                                                               |             |       |       |      |      |         |       |
|---------------|-----------------------------------------------------------------------------------------------|-------------|-------|-------|------|------|---------|-------|
| 11752690_a_at | RanBP-type and C3HC4-type zinc finger containing 1                                            | RBCK1       | 5.98  | 6.47  | 4.86 | 1.61 | 8.0E-03 | 0.200 |
| 11750138_a_at | pogo transposable element with KRAB domain                                                    | POGK        | 6.88  | 7.38  | 5.77 | 1.61 | 9.5E-04 | 0.096 |
| 11728817_x_at | ubiquitin specific peptidase 28                                                               | USP28       | 5.76  | 6.26  | 4.65 | 1.61 | 1.4E-03 | 0.113 |
| 11755389_s_at | netrin G2                                                                                     | NTNG2       | 7.20  | 7.70  | 6.10 | 1.60 | 4.7E-03 | 0.163 |
| 11720064_a_at | GLI pathogenesis-related 2                                                                    | GLIPR2      | 8.70  | 9.19  | 7.59 | 1.60 | 7.5E-03 | 0.192 |
| 11756458_a_at | MSH5-SAPCD1 readthrough (NMD candidate)                                                       | MSH5-SAPCD1 | 7.22  | 7.71  | 6.12 | 1.59 | 6.9E-03 | 0.187 |
| 11759125_at   | F-box and leucine-rich repeat protein 17                                                      | FBXL17      | 4.35  | 4.84  | 3.25 | 1.59 | 5.9E-03 | 0.178 |
| 11750732_x_at | nuclear factor of activated T-cells, cytoplasmic, calcineurin-dependent 2 interacting protein | NFATC2IP    | 6.51  | 7.00  | 5.41 | 1.59 | 6.1E-03 | 0.180 |
| 11758417_s_at | major histocompatibility complex, class II, DP alpha 1                                        | HLA-DPA1    | 8.90  | 9.39  | 7.81 | 1.57 | 2.7E-03 | 0.145 |
| 11732037_a_at | protein tyrosine phosphatase, non-receptor type 12                                            | PTPN12      | 8.89  | 9.37  | 7.80 | 1.57 | 1.6E-03 | 0.120 |
| 11757769_s_at | vinculin                                                                                      | VCL         | 8.68  | 9.16  | 7.60 | 1.56 | 1.9E-03 | 0.128 |
| 11754437_a_at | microtubule-actin crosslinking factor 1                                                       | MACF1       | 9.25  | 9.73  | 8.17 | 1.56 | 6.9E-03 | 0.187 |
| 11719911_at   | tumor necrosis factor (ligand) superfamily, member 12                                         | TNFSF12     | 7.85  | 8.33  | 6.77 | 1.56 | 7.4E-03 | 0.192 |
| 11756090_s_at | zinc fingers and homeoboxes 1                                                                 | ZHX1        | 6.16  | 6.64  | 5.09 | 1.55 | 3.3E-03 | 0.148 |
| 11754854_a_at | activating transcription factor 7 interacting protein 2                                       | ATF7IP2     | 6.91  | 7.38  | 5.84 | 1.54 | 8.3E-03 | 0.202 |
| 11727784_x_at | tropomyosin 4                                                                                 | TPM4        | 7.91  | 8.39  | 6.84 | 1.54 | 3.6E-03 | 0.151 |
| 11733593_a_at | pregnancy-zone protein                                                                        | PZP         | 7.94  | 8.41  | 6.88 | 1.53 | 5.9E-03 | 0.178 |
| 11715638_s_at | lysophosphatidylcholine acyltransferase 1                                                     | LPCAT1      | 9.50  | 9.97  | 8.44 | 1.53 | 2.6E-03 | 0.142 |
| 11728348_a_at | ribosomal protein L39-like                                                                    | RPL39L      | 6.83  | 7.30  | 5.78 | 1.52 | 5.2E-03 | 0.168 |
| 11716728_s_at | tropomyosin 1 (alpha)                                                                         | TPM1        | 5.21  | 5.68  | 4.16 | 1.52 | 2.2E-03 | 0.136 |
| 11716928_a_at | TBC1 domain family, member 5                                                                  | TBC1D5      | 8.25  | 8.72  | 7.20 | 1.52 | 7.0E-03 | 0.187 |
| 11741809_at   | histone cluster 1, H3j                                                                        | HIST1H3J    | 7.76  | 8.22  | 6.71 | 1.51 | 4.2E-03 | 0.161 |
| 11725474_a_at | mitogen-activated protein kinase kinase kinase 5                                              | MAP3K5      | 7.97  | 8.43  | 6.93 | 1.50 | 2.6E-03 | 0.142 |
| 11750484_a_at | MRE11 meiotic recombination 11 homolog A ( <i>S. cerevisiae</i> )                             | MRE11A      | 5.75  | 6.21  | 4.71 | 1.49 | 8.1E-03 | 0.201 |
| 11731693_at   | histone cluster 1, H2ae                                                                       | HIST1H2AE   | 9.65  | 10.11 | 8.62 | 1.49 | 3.5E-03 | 0.148 |
| 11718944_a_at | pyroglutamyl-peptidase I                                                                      | PGPEP1      | 6.85  | 7.31  | 5.82 | 1.49 | 7.5E-03 | 0.192 |
| 11736217_at   | mitogen-activated protein kinase kinase kinase 8                                              | MAP3K8      | 5.56  | 6.02  | 4.53 | 1.49 | 6.5E-03 | 0.181 |
| 11746954_s_at | chemokine (C-C motif) ligand 4                                                                | CCL4        | 11.01 | 11.47 | 9.99 | 1.48 | 4.8E-04 | 0.081 |
| 11716833_a_at | transmembrane 7 superfamily member 3                                                          | TM7SF3      | 6.88  | 7.33  | 5.87 | 1.47 | 8.6E-03 | 0.204 |
| 11716766_a_at | IQ motif containing GTPase activating protein 1                                               | IQGAP1      | 9.47  | 9.92  | 8.45 | 1.47 | 4.0E-03 | 0.157 |
| 11743881_s_at | melanoregulin                                                                                 | MREG        | 7.05  | 7.50  | 6.04 | 1.46 | 4.7E-03 | 0.163 |
| 11735394_s_at | chemokine (C motif) ligand 1                                                                  | XCL1        | 10.39 | 10.84 | 9.37 | 1.46 | 4.5E-03 | 0.163 |
| 11739754_at   | SLAM family member 8                                                                          | SLAMF8      | 6.16  | 6.61  | 5.16 | 1.46 | 1.4E-03 | 0.114 |
| 11733794_at   | syntaxin 7                                                                                    | STX7        | 5.96  | 6.41  | 4.96 | 1.45 | 6.3E-03 | 0.180 |
| 11727533_a_at | fasciculation and elongation protein zeta 2 (zygin II)                                        | FEZ2        | 5.46  | 5.91  | 4.46 | 1.45 | 9.0E-03 | 0.206 |

|               |                                                                    |           |      |      |      |      |         |       |
|---------------|--------------------------------------------------------------------|-----------|------|------|------|------|---------|-------|
| 11730947_at   | interferon, gamma                                                  | IFNG      | 9.21 | 9.66 | 8.21 | 1.45 | 3.0E-03 | 0.146 |
| 11727389_a_at | transient receptor potential cation channel, subfamily V, member 2 | TRPV2     | 8.12 | 8.56 | 7.12 | 1.44 | 4.2E-04 | 0.079 |
| 11719059_a_at | attractin                                                          | ATRN      | 5.99 | 6.43 | 4.99 | 1.44 | 3.4E-03 | 0.148 |
| 11724646_at   | VANGL planar cell polarity protein 1                               | VANGL1    | 6.58 | 7.02 | 5.59 | 1.43 | 6.4E-03 | 0.181 |
| 11742386_a_at | caspase 1, apoptosis-related cysteine peptidase                    | CASP1     | 8.23 | 8.67 | 7.24 | 1.43 | 5.9E-03 | 0.178 |
| 11723351_a_at | ATP-binding cassette, sub-family A (ABC1), member 3                | ABCA3     | 5.86 | 6.30 | 4.87 | 1.43 | 1.1E-03 | 0.107 |
| 11743530_a_at | centromere protein K                                               | CENPK     | 3.53 | 3.97 | 2.54 | 1.43 | 5.4E-03 | 0.172 |
| 11747942_a_at | zinc finger E-box binding homeobox 2                               | ZEB2      | 8.82 | 9.25 | 7.85 | 1.40 | 3.9E-03 | 0.156 |
| 11723178_s_at | solute carrier family 15 (oligopeptide transporter), member 4      | SLC15A4   | 8.66 | 9.09 | 7.70 | 1.39 | 7.0E-03 | 0.187 |
| 11747369_x_at | chromosome 1 open reading frame 112                                | C1orf112  | 3.88 | 4.31 | 2.92 | 1.39 | 8.4E-03 | 0.204 |
| 11719016_at   | PQ loop repeat containing 3                                        | PQLC3     | 8.28 | 8.71 | 7.32 | 1.39 | 6.5E-03 | 0.181 |
| 11715910_a_at | myosin VI                                                          | MYO6      | 7.56 | 7.98 | 6.60 | 1.39 | 4.5E-03 | 0.163 |
| 11715363_a_at | alpha-2-macroglobulin                                              | A2M       | 7.80 | 8.23 | 6.85 | 1.39 | 5.0E-03 | 0.167 |
| 11725347_a_at | transcription factor Dp-1                                          | TFDP1     | 6.03 | 6.46 | 5.07 | 1.39 | 8.2E-03 | 0.201 |
| 11743021_a_at | zinc finger protein 195                                            | ZNF195    | 5.28 | 5.70 | 4.33 | 1.37 | 6.0E-03 | 0.178 |
| 11744768_a_at | Z-DNA binding protein 1                                            | ZBP1      | 8.15 | 8.57 | 7.21 | 1.37 | 1.3E-03 | 0.113 |
| 11722522_a_at | sushi domain containing 1                                          | SUSD1     | 7.92 | 8.34 | 6.98 | 1.36 | 9.1E-03 | 0.208 |
| 11722217_x_at | G protein-coupled receptor 108                                     | GPR108    | 7.85 | 8.27 | 6.91 | 1.36 | 9.7E-03 | 0.212 |
| 11727375_a_at | 3-hydroxy-3-methylglutaryl-CoA reductase                           | HMGCR     | 7.05 | 7.47 | 6.12 | 1.35 | 4.7E-03 | 0.163 |
| 11751616_a_at | lactamase, beta 2                                                  | LACTB2    | 7.01 | 7.43 | 6.08 | 1.35 | 4.4E-03 | 0.162 |
| 11757779_s_at | protein phosphatase 4, regulatory subunit 1                        | PPP4R1    | 6.70 | 7.12 | 5.77 | 1.35 | 5.0E-03 | 0.167 |
| 11720244_at   | phospholipase C, gamma 2 (phosphatidylinositol-specific)           | PLCG2     | 7.29 | 7.70 | 6.36 | 1.34 | 2.8E-03 | 0.145 |
| 11726431_a_at | oxysterol binding protein-like 3                                   | OSBPL3    | 7.37 | 7.79 | 6.45 | 1.34 | 5.2E-03 | 0.168 |
| 11754404_a_at | poly (ADP-ribose) polymerase family, member 14                     | PARP14    | 8.37 | 8.78 | 7.45 | 1.33 | 3.5E-03 | 0.148 |
| 11754036_s_at | chromosome 20 open reading frame 194                               | C20orf194 | 6.12 | 6.53 | 5.21 | 1.33 | 8.0E-03 | 0.200 |
| 11759157_at   | histone cluster 1, H2bf                                            | HIST1H2BF | 9.27 | 9.67 | 8.35 | 1.32 | 3.0E-03 | 0.146 |
| 11717718_at   | fibronectin type III domain containing 3B                          | FNDC3B    | 7.06 | 7.46 | 6.17 | 1.29 | 7.6E-03 | 0.192 |
| 11727868_a_at | galactokinase 2                                                    | GALK2     | 4.82 | 5.22 | 3.93 | 1.29 | 4.8E-03 | 0.164 |
| 11750561_a_at | lysosomal trafficking regulator                                    | LYST      | 8.29 | 8.69 | 7.41 | 1.28 | 6.7E-03 | 0.184 |
| 11725716_a_at | kinesin family member 21A                                          | KIF21A    | 8.63 | 9.02 | 7.74 | 1.27 | 4.9E-03 | 0.166 |
| 11716430_a_at | solute carrier family 39 (zinc transporter), member 13             | SLC39A13  | 7.37 | 7.77 | 6.49 | 1.27 | 5.1E-03 | 0.168 |
| 11756310_a_at | nuclear transport factor 2-like export factor 2                    | NXT2      | 5.86 | 6.25 | 4.98 | 1.27 | 5.9E-03 | 0.178 |
| 11736238_a_at | ATP-binding cassette, sub-family A (ABC1), member 5                | ABCA5     | 4.67 | 5.06 | 3.79 | 1.27 | 6.0E-03 | 0.179 |
| 11736573_a_at | protein kinase C, delta                                            | PRKCD     | 5.03 | 5.41 | 4.16 | 1.25 | 6.3E-03 | 0.180 |
| 11751127_a_at | shisa family member 5                                              | SHISA5    | 8.68 | 9.06 | 7.82 | 1.25 | 7.2E-03 | 0.189 |
| 11730147_a_at | G protein-coupled receptor 114                                     | GPR114    | 5.10 | 5.48 | 4.23 | 1.25 | 9.4E-03 | 0.212 |

|               |                                                                                                       |          |       |       |       |       |         |       |
|---------------|-------------------------------------------------------------------------------------------------------|----------|-------|-------|-------|-------|---------|-------|
| 11739563_a_at | inositol 1,4,5-trisphosphate receptor, type 1                                                         | ITPR1    | 7.65  | 8.03  | 6.79  | 1.24  | 7.5E-03 | 0.192 |
| 11736144_at   | ectonucleotide pyrophosphatase/phosphodiesterase 4 (putative)                                         | ENPP4    | 8.06  | 8.44  | 7.20  | 1.24  | 3.7E-03 | 0.152 |
| 11745366_x_at | protein O-linked mannose N-acetylglucosaminyltransferase 1 (beta 1,2-)                                | POMGNT1  | 7.43  | 7.81  | 6.58  | 1.23  | 9.8E-03 | 0.212 |
| 11759648_at   | cAMP responsive element binding protein 3-like 2                                                      | CREB3L2  | 5.67  | 6.04  | 4.81  | 1.23  | 7.4E-03 | 0.192 |
| 11762400_s_at | peptidylprolyl isomerase (cyclophilin)-like 2                                                         | PPI2     | 10.46 | 10.83 | 9.61  | 1.22  | 7.4E-03 | 0.192 |
| 11726009_a_at | carbonyl reductase 4                                                                                  | CBR4     | 7.13  | 7.50  | 6.30  | 1.21  | 7.6E-03 | 0.192 |
| 11730865_a_at | vitamin K epoxide reductase complex, subunit 1-like 1                                                 | VKORC1L1 | 7.30  | 7.67  | 6.46  | 1.21  | 6.5E-03 | 0.181 |
| 11750103_a_at | hydroxyacyl-CoA dehydrogenase                                                                         | HADH     | 7.23  | 7.60  | 6.39  | 1.21  | 6.8E-03 | 0.185 |
| 11743046_a_at | flotillin 1                                                                                           | FLOT1    | 8.71  | 9.08  | 7.87  | 1.21  | 8.3E-03 | 0.202 |
| 11735942_at   | histone cluster 1, H4d                                                                                | HIST1H4D | 7.13  | 7.50  | 6.29  | 1.21  | 9.8E-03 | 0.212 |
| 11717727_s_at | hematological and neurological expressed 1                                                            | HN1      | 8.01  | 8.38  | 7.19  | 1.19  | 7.1E-03 | 0.188 |
| 11732376_a_at | TBC1 domain family, member 19                                                                         | TBC1D19  | 6.45  | 6.81  | 5.63  | 1.18  | 3.4E-03 | 0.148 |
| 11751304_a_at | integrin, alpha L (antigen CD11A (p180), lymphocyte function-associated antigen 1; alpha polypeptide) | ITGAL    | 9.53  | 9.89  | 8.72  | 1.18  | 7.2E-03 | 0.188 |
| 11740879_s_at | annexin A2                                                                                            | ANXA2    | 10.43 | 10.79 | 9.61  | 1.18  | 6.3E-03 | 0.180 |
| 11742740_at   | gem (nuclear organelle) associated protein 5                                                          | GEMIN5   | 7.56  | 7.91  | 6.75  | 1.17  | 9.6E-03 | 0.212 |
| 11751748_a_at | chimerin 2                                                                                            | CHN2     | 9.99  | 10.34 | 9.21  | 1.14  | 5.2E-03 | 0.168 |
| 11742718_a_at | SAFB-like, transcription modulator                                                                    | SLTM     | 6.34  | 6.69  | 5.55  | 1.13  | 8.2E-03 | 0.201 |
| 11715371_a_at | ubiquitin-like modifier activating enzyme 1                                                           | UBA1     | 10.33 | 10.68 | 9.54  | 1.13  | 9.8E-03 | 0.212 |
| 11752885_x_at | tripeptidyl peptidase I                                                                               | TPP1     | 8.70  | 9.05  | 7.93  | 1.12  | 9.9E-03 | 0.212 |
| 11759961_at   | ArfGAP with FG repeats 2                                                                              | AGFG2    | 5.55  | 5.89  | 4.78  | 1.11  | 5.2E-03 | 0.168 |
| 11744083_at   | ankyrin repeat and IBR domain containing 1                                                            | ANKIB1   | 6.21  | 6.55  | 5.44  | 1.11  | 5.5E-03 | 0.173 |
| 11725124_at   | cystatin F (leukocystatin)                                                                            | CST7     | 11.76 | 12.10 | 11.00 | 1.11  | 8.2E-03 | 0.201 |
| 11717956_s_at | serine threonine kinase 39                                                                            | STK39    | 9.34  | 9.68  | 8.57  | 1.10  | 9.6E-03 | 0.212 |
| 11733439_a_at | guanylate binding protein 5                                                                           | GBP5     | 8.41  | 8.75  | 7.65  | 1.10  | 4.8E-03 | 0.164 |
| 11743615_s_at | ubiquitin specific peptidase 47                                                                       | USP47    | 5.86  | 6.19  | 5.10  | 1.09  | 9.0E-03 | 0.206 |
| 11756255_x_at | tyrosine 3-monooxygenase/tryptophan 5-monooxygenase activation protein, eta                           | YWHAH    | 8.76  | 9.10  | 8.01  | 1.08  | 8.5E-03 | 0.204 |
| 11750408_a_at | CD97 molecule                                                                                         | CD97     | 10.33 | 10.66 | 9.58  | 1.08  | 3.1E-03 | 0.148 |
| 11748654_a_at | protein tyrosine phosphatase, non-receptor type 22 (lymphoid)                                         | PTPN22   | 9.36  | 9.68  | 8.63  | 1.05  | 6.4E-03 | 0.181 |
| 11717526_a_at | radixin                                                                                               | RDX      | 6.24  | 6.55  | 5.52  | 1.03  | 9.7E-03 | 0.212 |
| 11725416_at   | natural killer cell granule protein 7                                                                 | NKG7     | 12.05 | 12.37 | 11.34 | 1.03  | 9.5E-03 | 0.212 |
| 11747253_a_at | uracil-DNA glycosylase                                                                                | UNG      | 6.08  | 6.39  | 5.37  | 1.02  | 9.8E-03 | 0.212 |
| 11716987_a_at | 3-hydroxy-3-methylglutaryl-CoA synthase 1 (soluble)                                                   | HMGCS1   | 7.67  | 7.98  | 6.96  | 1.02  | 9.2E-03 | 0.208 |
| 11723958_s_at | LSM5 homolog, U6 small nuclear RNA associated ( <i>S. cerevisiae</i> )                                | LSM5     | 8.93  | 8.62  | 9.64  | -1.02 | 5.7E-03 | 0.176 |
| 11728647_at   | nuclear casein kinase and cyclin-dependent kinase substrate 1                                         | NUCKS1   | 8.82  | 8.51  | 9.53  | -1.02 | 7.6E-03 | 0.192 |
| 11755413_a_at | DENN/MADD domain containing 6B                                                                        | DENND6B  | 4.88  | 4.57  | 5.59  | -1.02 | 9.4E-03 | 0.212 |



|               |                                                                                               |         |      |      |       |       |         |       |
|---------------|-----------------------------------------------------------------------------------------------|---------|------|------|-------|-------|---------|-------|
| 11733100_at   | ubiquitin specific peptidase 12                                                               | USP12   | 7.69 | 7.37 | 8.40  | -1.03 | 9.5E-03 | 0.212 |
| 11748277_a_at | activating signal cointegrator 1 complex subunit 1                                            | ASCC1   | 6.38 | 6.05 | 7.11  | -1.06 | 8.7E-03 | 0.204 |
| 11721121_a_at | spinster homolog 1 (Drosophila)                                                               | SPNS1   | 6.71 | 6.38 | 7.44  | -1.07 | 8.9E-03 | 0.206 |
| 11736803_at   | fibroblast growth factor 9                                                                    | FGF9    | 3.96 | 3.62 | 4.72  | -1.10 | 8.6E-03 | 0.204 |
| 11728093_a_at | mitogen-activated protein kinase kinase kinase 1, E3 ubiquitin protein ligase                 | MAP3K1  | 9.58 | 9.23 | 10.36 | -1.13 | 5.7E-03 | 0.176 |
| 11729536_a_at | synaptonemal complex central element protein 2                                                | SYCE2   | 5.22 | 4.87 | 6.00  | -1.13 | 8.3E-03 | 0.202 |
| 11717559_a_at | actin binding LIM protein 1                                                                   | ABLIM1  | 9.79 | 9.44 | 10.58 | -1.14 | 3.2E-03 | 0.148 |
| 11751644_a_at | pre-B-cell leukemia homeobox interacting protein 1                                            | PBXIP1  | 6.96 | 6.61 | 7.75  | -1.14 | 6.6E-03 | 0.182 |
| 11755616_a_at | solute carrier family 8 (sodium/lithium/calcium exchanger), member B1                         | SLC8B1  | 7.61 | 7.26 | 8.41  | -1.16 | 8.1E-03 | 0.201 |
| 11732764_x_at | coiled-coil domain containing 120                                                             | CCDC120 | 5.82 | 5.47 | 6.62  | -1.16 | 8.8E-03 | 0.205 |
| 11743906_a_at | UDP-glucuronate decarboxylase 1                                                               | UXS1    | 8.49 | 8.14 | 9.30  | -1.16 | 9.1E-03 | 0.208 |
| 11715823_x_at | synaptophysin-like 1                                                                          | SYPL1   | 7.47 | 7.11 | 8.28  | -1.17 | 2.0E-03 | 0.129 |
| 11748850_a_at | fms-related tyrosine kinase 3 ligand                                                          | FLT3LG  | 8.85 | 8.49 | 9.66  | -1.17 | 7.2E-03 | 0.188 |
| 11732338_a_at | K(lysine) acetyltransferase 8                                                                 | KAT8    | 7.62 | 7.26 | 8.43  | -1.17 | 1.0E-02 | 0.213 |
| 11726018_a_at | family with sequence similarity 222, member B                                                 | FAM222B | 7.11 | 6.74 | 7.92  | -1.18 | 5.1E-03 | 0.168 |
| 11729926_at   | zinc finger protein 510                                                                       | ZNF510  | 6.03 | 5.67 | 6.86  | -1.19 | 3.2E-03 | 0.148 |
| 11728454_s_at | dedicator of cytokinesis 9                                                                    | DOCK9   | 6.23 | 5.86 | 7.06  | -1.20 | 4.2E-03 | 0.161 |
| 11747889_x_at | SH3 and SYLF domain containing 1                                                              | SH3YL1  | 6.63 | 6.26 | 7.46  | -1.20 | 5.8E-03 | 0.176 |
| 11718540_at   | transmembrane protein 243, mitochondrial                                                      | TMEM243 | 6.98 | 6.60 | 7.81  | -1.21 | 9.9E-03 | 0.212 |
| 11736473_a_at | transcription factor 7 (T-cell specific, HMG-box)                                             | TCF7    | 9.99 | 9.61 | 10.83 | -1.22 | 5.7E-03 | 0.176 |
| 11757404_x_at | inhibitor of DNA binding 3, dominant negative helix-loop-helix protein                        | ID3     | 5.85 | 5.47 | 6.69  | -1.22 | 5.1E-03 | 0.168 |
| 11727090_a_at | zinc finger and BTB domain containing 18                                                      | ZBTB18  | 7.18 | 6.80 | 8.04  | -1.24 | 5.8E-03 | 0.176 |
| 11716483_x_at | glutamate receptor, ionotropic, N-methyl D-aspartate-associated protein 1 (glutamate binding) | GRINA   | 6.27 | 5.89 | 7.13  | -1.25 | 4.5E-03 | 0.163 |
| 11732278_at   | forkhead box P1                                                                               | FOXP1   | 9.56 | 9.18 | 10.42 | -1.25 | 1.6E-03 | 0.120 |
| 11753051_x_at | zinc finger protein 483                                                                       | ZNF483  | 5.87 | 5.49 | 6.74  | -1.25 | 6.7E-03 | 0.184 |
| 11721186_a_at | Rab geranylgeranyltransferase, alpha subunit                                                  | RABGGTA | 7.17 | 6.79 | 8.04  | -1.25 | 4.3E-03 | 0.161 |
| 11758239_s_at | chromosome 9 open reading frame 72                                                            | C9orf72 | 3.33 | 2.94 | 4.20  | -1.26 | 5.9E-03 | 0.178 |
| 11718674_a_at | transmembrane protein 245                                                                     | TMEM245 | 5.30 | 4.91 | 6.17  | -1.26 | 1.6E-03 | 0.120 |
| 11759532_at   | factor interacting with PAPOLA and CPSF1                                                      | FIP1L1  | 4.68 | 4.29 | 5.56  | -1.27 | 3.9E-03 | 0.155 |
| 11725301_x_at | DEAD (Asp-Glu-Ala-Asp) box polypeptide 19A                                                    | DDX19A  | 6.64 | 6.25 | 7.52  | -1.27 | 4.9E-03 | 0.167 |
| 11728004_s_at | Ral GEF with PH domain and SH3 binding motif 2                                                | RALGPS2 | 3.19 | 2.80 | 4.07  | -1.27 | 5.2E-03 | 0.168 |
| 11742747_a_at | signal peptide peptidase like 3                                                               | SPPL3   | 7.01 | 6.62 | 7.89  | -1.27 | 4.1E-03 | 0.159 |
| 11755772_a_at | forkhead box O1                                                                               | FOXO1   | 9.18 | 8.79 | 10.07 | -1.28 | 8.7E-03 | 0.204 |
| 11718618_a_at | DnaJ (Hsp40) homolog, subfamily A, member 4                                                   | DNAJA4  | 5.27 | 4.88 | 6.16  | -1.28 | 7.0E-03 | 0.187 |
| 11725441_a_at | forkhead box M1                                                                               | FOXM1   | 5.15 | 4.76 | 6.04  | -1.28 | 8.7E-03 | 0.204 |

|               |                                                                                                     |          |      |      |       |       |         |       |
|---------------|-----------------------------------------------------------------------------------------------------|----------|------|------|-------|-------|---------|-------|
| 11724377_at   | phosphoprotein membrane anchor with glycosphingolipid microdomains 1                                | PAG1     | 6.84 | 6.44 | 7.73  | -1.29 | 2.4E-03 | 0.138 |
| 11752636_a_at | transient receptor potential cation channel, subfamily C, member 4 associated protein               | TRPC4AP  | 6.19 | 5.79 | 7.08  | -1.30 | 6.3E-03 | 0.180 |
| 11721295_a_at | signal transducing adaptor molecule (SH3 domain and ITAM motif) 1                                   | STAM     | 5.93 | 5.53 | 6.83  | -1.30 | 4.8E-03 | 0.165 |
| 11744600_a_at | thymocyte expressed, positive selection associated 1                                                | TESPA1   | 8.53 | 8.13 | 9.43  | -1.30 | 4.0E-03 | 0.159 |
| 11762132_a_at | adhesion molecule, interacts with CXADR antigen 1                                                   | AMICA1   | 5.19 | 4.79 | 6.10  | -1.30 | 6.2E-03 | 0.180 |
| 11734292_x_at | zinc finger protein 417                                                                             | ZNF417   | 4.77 | 4.36 | 5.67  | -1.31 | 8.9E-03 | 0.206 |
| 11758571_s_at | neural precursor cell expressed, developmentally down-regulated 4-like, E3 ubiquitin protein ligase | NEDD4L   | 5.33 | 4.92 | 6.24  | -1.32 | 3.4E-03 | 0.148 |
| 11716124_a_at | N-acetyltransferase 10 (GCN5-related)                                                               | NAT10    | 6.68 | 6.27 | 7.59  | -1.32 | 1.7E-03 | 0.120 |
| 11762238_a_at | transmembrane protein 128                                                                           | TMEM128  | 4.77 | 4.36 | 5.70  | -1.33 | 4.6E-03 | 0.163 |
| 11727633_at   | solute carrier family 16 (aromatic amino acid transporter), member 10                               | SLC16A10 | 3.47 | 3.06 | 4.40  | -1.33 | 5.4E-03 | 0.171 |
| 11721900_at   | ficolin (collagen/fibrinogen domain containing) 1                                                   | FCN1     | 4.55 | 4.13 | 5.47  | -1.34 | 1.1E-03 | 0.107 |
| 11756268_a_at | F-box protein 4                                                                                     | FBXO4    | 5.52 | 5.11 | 6.45  | -1.34 | 7.9E-03 | 0.198 |
| 11743962_at   | consortin, connexin sorting protein                                                                 | CNST     | 5.53 | 5.12 | 6.46  | -1.35 | 2.1E-03 | 0.133 |
| 11731828_at   | glypican 2                                                                                          | GPC2     | 5.31 | 4.89 | 6.24  | -1.35 | 6.4E-03 | 0.181 |
| 11721958_at   | yippee-like 2 (Drosophila)                                                                          | YPEL2    | 6.65 | 6.23 | 7.58  | -1.35 | 1.7E-03 | 0.120 |
| 11731513_at   | exportin 4                                                                                          | XPO4     | 7.10 | 6.68 | 8.04  | -1.35 | 4.3E-03 | 0.161 |
| 11755826_a_at | selectin P (granule membrane protein 140kDa, antigen CD62)                                          | SELP     | 3.84 | 3.42 | 4.77  | -1.35 | 1.5E-03 | 0.116 |
| 11738261_at   | zinc finger protein 493                                                                             | ZNF493   | 4.00 | 3.59 | 4.94  | -1.35 | 6.1E-03 | 0.180 |
| 11718453_a_at | axin 2                                                                                              | AXIN2    | 6.16 | 5.75 | 7.11  | -1.36 | 5.3E-03 | 0.169 |
| 11722541_a_at | human immunodeficiency virus type I enhancer binding protein 2                                      | HIVEP2   | 6.08 | 5.66 | 7.03  | -1.36 | 2.8E-03 | 0.145 |
| 11727470_x_at | zinc finger protein 544                                                                             | ZNF544   | 7.32 | 6.89 | 8.28  | -1.38 | 7.7E-03 | 0.195 |
| 11719463_a_at | lipolysis stimulated lipoprotein receptor                                                           | LSR      | 8.20 | 7.78 | 9.16  | -1.38 | 3.3E-03 | 0.148 |
| 11763504_at   | neurofibromin 1                                                                                     | NF1      | 4.00 | 3.57 | 4.96  | -1.38 | 4.7E-03 | 0.163 |
| 11734742_a_at | LIM domain kinase 2                                                                                 | LIMK2    | 8.20 | 7.77 | 9.16  | -1.39 | 3.4E-03 | 0.148 |
| 11763283_at   | phosphatidylinositol-4,5-bisphosphate 3-kinase, catalytic subunit alpha                             | PIK3CA   | 6.57 | 6.14 | 7.53  | -1.39 | 6.3E-03 | 0.180 |
| 11757737_s_at | recombination signal binding protein for immunoglobulin kappa J region                              | RBPJ     | 8.77 | 8.34 | 9.74  | -1.39 | 1.8E-03 | 0.123 |
| 11725181_a_at | Rho guanine nucleotide exchange factor (GEF) 4                                                      | ARHGEF4  | 5.56 | 5.13 | 6.53  | -1.40 | 4.0E-04 | 0.079 |
| 11756230_a_at | filamin B, beta                                                                                     | FLNB     | 5.17 | 4.74 | 6.13  | -1.40 | 5.6E-03 | 0.173 |
| 11743991_at   | MRG/MORF4L binding protein                                                                          | MRGBP    | 6.59 | 6.16 | 7.56  | -1.40 | 1.8E-03 | 0.120 |
| 11763594_a_at | heparan sulfate (glucosamine) 3-O-sulfotransferase 3B1                                              | HS3ST3B1 | 5.94 | 5.51 | 6.91  | -1.40 | 9.1E-03 | 0.208 |
| 11756585_a_at | aquaporin 3 (Gill blood group)                                                                      | AQP3     | 9.30 | 8.87 | 10.27 | -1.40 | 1.7E-03 | 0.120 |
| 11739738_at   | DCN1, defective in cullin neddylation 1, domain containing 2                                        | DCUN1D2  | 7.76 | 7.33 | 8.73  | -1.40 | 3.5E-03 | 0.148 |
| 11717073_a_at | AE binding protein 1                                                                                | AEBP1    | 7.24 | 6.80 | 8.22  | -1.41 | 2.2E-03 | 0.134 |
| 11752398_a_at | chromosome 1 open reading frame 228                                                                 | C1orf228 | 8.44 | 8.01 | 9.42  | -1.42 | 9.3E-03 | 0.210 |

|               |                                                                        |          |      |      |       |       |         |       |
|---------------|------------------------------------------------------------------------|----------|------|------|-------|-------|---------|-------|
| 11755726_a_at | transmembrane protein 30B                                              | TMEM30B  | 5.70 | 5.26 | 6.68  | -1.43 | 3.3E-03 | 0.148 |
| 11725252_at   | family with sequence similarity 120C                                   | FAM120C  | 3.77 | 3.33 | 4.76  | -1.43 | 7.2E-03 | 0.188 |
| 11732301_at   | interleukin 23, alpha subunit p19                                      | IL23A    | 5.31 | 4.87 | 6.31  | -1.44 | 1.4E-03 | 0.113 |
| 11717710_a_at | mitochondrial fission process 1                                        | MTFP1    | 8.93 | 8.49 | 9.93  | -1.44 | 7.4E-03 | 0.192 |
| 11728375_x_at | actinin, alpha 1                                                       | ACTN1    | 7.54 | 7.10 | 8.54  | -1.44 | 9.7E-03 | 0.212 |
| 11743718_a_at | zinc finger protein interacting with K protein 1                       | ZIK1     | 2.98 | 2.53 | 3.98  | -1.45 | 2.4E-03 | 0.138 |
| 11734084_a_at | sushi domain containing 3                                              | SUSD3    | 7.71 | 7.26 | 8.72  | -1.46 | 4.1E-03 | 0.159 |
| 11743384_at   | PRP40 pre-mRNA processing factor 40 homolog A ( <i>S. cerevisiae</i> ) | PRPF40A  | 5.15 | 4.70 | 6.16  | -1.46 | 4.6E-03 | 0.163 |
| 11747669_x_at | integral membrane protein 2C                                           | ITM2C    | 6.83 | 6.38 | 7.84  | -1.46 | 8.6E-03 | 0.204 |
| 11751822_a_at | minichromosome maintenance complex component 6                         | MCM6     | 5.86 | 5.41 | 6.88  | -1.46 | 4.7E-03 | 0.163 |
| 11728161_at   | wingless-type MMTV integration site family, member 7A                  | WNT7A    | 5.59 | 5.14 | 6.61  | -1.47 | 1.4E-03 | 0.113 |
| 11742872_s_at | phosphoinositide-3-kinase interacting protein 1                        | PIK3IP1  | 7.26 | 6.80 | 8.28  | -1.48 | 2.5E-03 | 0.141 |
| 11722850_a_at | baculoviral IAP repeat containing 3                                    | BIRC3    | 8.36 | 7.91 | 9.38  | -1.48 | 8.6E-04 | 0.093 |
| 11731967_a_at | calcium channel, voltage-dependent, T type, alpha 1I subunit           | CACNA1I  | 6.43 | 5.98 | 7.46  | -1.49 | 5.5E-03 | 0.172 |
| 11733355_x_at | complement component 5a receptor 1                                     | C5AR1    | 3.38 | 2.92 | 4.42  | -1.49 | 9.0E-04 | 0.094 |
| 11759784_at   | supervillin                                                            | SVIL     | 5.00 | 4.54 | 6.03  | -1.50 | 9.8E-03 | 0.212 |
| 11732752_at   | RNA binding motif protein 44                                           | RBM44    | 3.29 | 2.83 | 4.33  | -1.50 | 6.0E-03 | 0.178 |
| 11717949_a_at | sterol-C5-desaturase                                                   | SC5D     | 4.83 | 4.37 | 5.87  | -1.50 | 1.2E-03 | 0.109 |
| 11723960_at   | sec1 family domain containing 2                                        | SCFD2    | 4.13 | 3.67 | 5.17  | -1.51 | 9.0E-03 | 0.207 |
| 11717017_a_at | OCIA domain containing 2                                               | OCIAD2   | 8.95 | 8.48 | 9.99  | -1.51 | 3.0E-03 | 0.146 |
| 11732763_at   | glutamate receptor, ionotropic, N-methyl-D-aspartate 3A                | GRIN3A   | 4.10 | 3.64 | 5.15  | -1.51 | 3.2E-03 | 0.148 |
| 11746747_a_at | coenzyme Q2 4-hydroxybenzoate polyprenyltransferase                    | COQ2     | 5.16 | 4.70 | 6.21  | -1.51 | 2.3E-03 | 0.138 |
| 11720144_s_at | centriole, cilia and spindle-associated protein                        | CCSAP    | 6.21 | 5.74 | 7.26  | -1.52 | 8.6E-03 | 0.204 |
| 11747157_a_at | cerebral dopamine neurotrophic factor                                  | CDNF     | 3.42 | 2.95 | 4.47  | -1.52 | 1.6E-03 | 0.120 |
| 11737790_a_at | peptidyl-tRNA hydrolase 2                                              | PTRH2    | 7.88 | 7.41 | 8.93  | -1.52 | 7.0E-03 | 0.187 |
| 11753854_a_at | CD28 molecule                                                          | CD28     | 8.93 | 8.46 | 9.98  | -1.52 | 5.1E-03 | 0.168 |
| 11739641_a_at | actin filament associated protein 1                                    | AFAP1    | 5.54 | 5.07 | 6.59  | -1.52 | 5.6E-03 | 0.175 |
| 11716553_a_at | rhomboid domain containing 2                                           | RHBDD2   | 7.69 | 7.22 | 8.74  | -1.52 | 8.3E-03 | 0.202 |
| 11720845_a_at | CD248 molecule, endosialin                                             | CD248    | 6.08 | 5.61 | 7.14  | -1.53 | 5.8E-03 | 0.177 |
| 11716812_x_at | SIN3 transcription regulator family member B                           | SIN3B    | 5.85 | 5.38 | 6.91  | -1.53 | 2.9E-03 | 0.146 |
| 11716263_s_at | leptin receptor overlapping transcript-like 1                          | LEPROTL1 | 9.40 | 8.93 | 10.45 | -1.53 | 5.4E-04 | 0.082 |
| 11737745_a_at | oviductal glycoprotein 1, 120kDa                                       | OVGP1    | 4.98 | 4.51 | 6.04  | -1.53 | 8.8E-03 | 0.204 |
| 11741089_x_at | CD79a molecule, immunoglobulin-associated alpha                        | CD79A    | 4.78 | 4.31 | 5.84  | -1.53 | 4.3E-04 | 0.079 |
| 11745217_a_at | MKL/myocardin-like 2                                                   | MKL2     | 5.45 | 4.98 | 6.51  | -1.53 | 4.4E-03 | 0.162 |
| 11747357_a_at | cytokine induced apoptosis inhibitor 1                                 | CIAPIN1  | 4.63 | 4.15 | 5.70  | -1.55 | 8.2E-03 | 0.201 |
| 11730474_at   | phosphodiesterase 3B, cGMP-inhibited                                   | PDE3B    | 9.23 | 8.76 | 10.31 | -1.55 | 3.8E-03 | 0.153 |

|               |                                                                      |         |      |      |       |       |         |       |
|---------------|----------------------------------------------------------------------|---------|------|------|-------|-------|---------|-------|
| 11727378_at   | TBC1 domain family, member 15                                        | TBC1D15 | 5.14 | 4.66 | 6.22  | -1.55 | 4.9E-03 | 0.167 |
| 11750148_a_at | sushi, nidogen and EGF-like domains 1                                | SNED1   | 5.48 | 5.00 | 6.56  | -1.56 | 3.0E-03 | 0.146 |
| 11725445_x_at | B-cell CLL/lymphoma 3                                                | BCL3    | 7.28 | 6.80 | 8.36  | -1.56 | 3.0E-03 | 0.146 |
| 11722997_s_at | nucleolar protein 11                                                 | NOL11   | 7.44 | 6.96 | 8.52  | -1.56 | 4.6E-03 | 0.163 |
| 11756224_s_at | zinc finger, DHHC-type containing 9                                  | ZDHHC9  | 4.52 | 4.04 | 5.61  | -1.56 | 1.3E-03 | 0.113 |
| 11745703_a_at | RCAN family member 3                                                 | RCAN3   | 9.54 | 9.06 | 10.63 | -1.58 | 2.4E-03 | 0.138 |
| 11726961_at   | small glutamine-rich tetratricopeptide repeat (TPR)-containing, beta | SGTB    | 8.74 | 8.26 | 9.84  | -1.58 | 6.5E-03 | 0.181 |
| 11746331_a_at | adenosine kinase                                                     | ADK     | 6.68 | 6.20 | 7.78  | -1.59 | 2.6E-03 | 0.143 |
| 11735105_a_at | CD40 ligand                                                          | CD40LG  | 5.73 | 5.24 | 6.83  | -1.59 | 5.0E-03 | 0.167 |
| 11719737_a_at | family with sequence similarity 134, member B                        | FAM134B | 6.37 | 5.88 | 7.47  | -1.59 | 3.7E-03 | 0.152 |
| 11742215_s_at | amyloid beta (A4) precursor protein                                  | APP     | 3.72 | 3.23 | 4.82  | -1.59 | 3.3E-03 | 0.148 |
| 11737845_x_at | family with sequence similarity 102, member A                        | FAM102A | 9.44 | 8.95 | 10.55 | -1.60 | 8.3E-04 | 0.093 |
| 11763378_a_at | zinc finger protein 302                                              | ZNF302  | 3.95 | 3.46 | 5.06  | -1.60 | 4.1E-03 | 0.159 |
| 11759658_a_at | reversion-inducing-cysteine-rich protein with kazal motifs           | RECK    | 5.03 | 4.54 | 6.14  | -1.60 | 3.0E-03 | 0.146 |
| 11758312_x_at | TBC1 domain family, member 3                                         | TBC1D3  | 6.01 | 5.52 | 7.12  | -1.60 | 2.5E-03 | 0.141 |
| 11749344_a_at | dehydrogenase/reductase (SDR family) member 3                        | DHRS3   | 6.31 | 5.81 | 7.43  | -1.62 | 3.5E-04 | 0.079 |
| 11734216_a_at | membrane protein, palmitoylated 7 (MAGUK p55 subfamily member 7)     | MPP7    | 6.40 | 5.90 | 7.52  | -1.62 | 3.3E-04 | 0.079 |
| 11764149_s_at | dual specificity phosphatase 16                                      | DUSP16  | 8.19 | 7.69 | 9.31  | -1.62 | 2.7E-04 | 0.079 |
| 11721889_a_at | heat shock factor binding protein 1-like 1                           | HSBP1L1 | 6.05 | 5.55 | 7.17  | -1.62 | 3.0E-03 | 0.146 |
| 11722853_a_at | hyaluronan binding protein 4                                         | HABP4   | 7.11 | 6.61 | 8.24  | -1.63 | 3.5E-03 | 0.148 |
| 11727757_at   | oncostatin M                                                         | OSM     | 5.91 | 5.41 | 7.04  | -1.64 | 4.2E-04 | 0.079 |
| 11729955_x_at | fragile histidine triad                                              | FHIT    | 6.39 | 5.88 | 7.52  | -1.64 | 2.3E-03 | 0.138 |
| 11716147_s_at | charged multivesicular body protein 7                                | CHMP7   | 7.96 | 7.45 | 9.09  | -1.64 | 2.4E-03 | 0.140 |
| 11759805_at   | Williams-Beuren syndrome chromosome region 16                        | WBSCR16 | 4.33 | 3.82 | 5.47  | -1.65 | 3.1E-04 | 0.079 |
| 11759059_at   | zinc finger protein 134                                              | ZNF134  | 5.74 | 5.23 | 6.88  | -1.65 | 3.9E-03 | 0.155 |
| 11759232_at   | chromosome 6 open reading frame 25                                   | C6orf25 | 4.08 | 3.57 | 5.22  | -1.65 | 2.3E-03 | 0.138 |
| 11736352_at   | transmembrane protein 220                                            | TMEM220 | 4.56 | 4.05 | 5.70  | -1.65 | 2.5E-03 | 0.141 |
| 11715490_s_at | actin, gamma 1 pseudogene 4                                          | ACTG1P4 | 5.96 | 5.45 | 7.11  | -1.66 | 5.4E-03 | 0.172 |
| 11759346_a_at | mastermind-like 2 (Drosophila)                                       | MAML2   | 6.10 | 5.59 | 7.25  | -1.66 | 2.4E-03 | 0.138 |
| 11725799_a_at | ubiquitin specific peptidase 46                                      | USP46   | 4.43 | 3.92 | 5.58  | -1.66 | 2.1E-03 | 0.133 |
| 11745071_a_at | transcription elongation factor A (SII)-like 4                       | TCEAL4  | 8.13 | 7.62 | 9.29  | -1.67 | 1.1E-04 | 0.075 |
| 11753716_a_at | adaptor-related protein complex 4, sigma 1 subunit                   | AP4S1   | 4.22 | 3.70 | 5.38  | -1.67 | 1.9E-04 | 0.079 |
| 11719406_a_at | homeodomain interacting protein kinase 2                             | HIPK2   | 5.48 | 4.96 | 6.66  | -1.69 | 4.3E-03 | 0.161 |
| 11718705_at   | insulin-like growth factor 1 receptor                                | IGF1R   | 4.25 | 3.73 | 5.42  | -1.69 | 8.1E-03 | 0.201 |
| 11752282_a_at | PTPRF interacting protein, binding protein 2 (liprin beta 2)         | PPFIBP2 | 5.05 | 4.52 | 6.22  | -1.70 | 2.9E-03 | 0.146 |
| 11762418_x_at | SCAN domain containing 2 pseudogene                                  | SCAND2P | 5.44 | 4.91 | 6.63  | -1.72 | 1.1E-03 | 0.108 |

|               |                                                                                    |            |      |      |      |       |         |       |
|---------------|------------------------------------------------------------------------------------|------------|------|------|------|-------|---------|-------|
| 11725411_at   | neuron navigator 1                                                                 | NAV1       | 3.85 | 3.32 | 5.05 | -1.72 | 8.8E-03 | 0.204 |
| 11759527_at   | solute carrier family 11 (proton-coupled divalent metal ion transporter), member 2 | SLC11A2    | 5.40 | 4.87 | 6.59 | -1.72 | 3.3E-04 | 0.079 |
| 11716148_a_at | TRAF3 interacting protein 2                                                        | TRAF3IP2   | 6.21 | 5.67 | 7.41 | -1.74 | 8.7E-03 | 0.204 |
| 11739658_a_at | lymphotoxin beta (TNF superfamily, member 3)                                       | LTB        | 8.11 | 7.57 | 9.33 | -1.75 | 8.8E-04 | 0.094 |
| 11756641_a_at | zinc finger protein 256                                                            | ZNF256     | 6.45 | 5.91 | 7.67 | -1.76 | 7.1E-04 | 0.090 |
| 11751420_a_at | zinc finger, CW type with PWWP domain 1                                            | ZCWPW1     | 5.49 | 4.95 | 6.71 | -1.76 | 2.0E-04 | 0.079 |
| 11717435_a_at | cell division cycle associated 7-like                                              | CDCA7L     | 5.23 | 4.69 | 6.45 | -1.76 | 9.9E-03 | 0.212 |
| 11729409_at   | zinc finger protein 764                                                            | ZNF764     | 7.25 | 6.70 | 8.47 | -1.77 | 3.1E-03 | 0.146 |
| 11758485_s_at | ankyrin repeat domain 13C                                                          | ANKRD13C   | 4.51 | 3.96 | 5.74 | -1.77 | 2.3E-03 | 0.138 |
| 11748351_a_at | thrombospondin 3                                                                   | THBS3      | 6.20 | 5.65 | 7.43 | -1.78 | 6.1E-03 | 0.180 |
| 11746678_a_at | RNA binding motif protein 11                                                       | RBM11      | 5.12 | 4.57 | 6.35 | -1.78 | 1.5E-03 | 0.119 |
| 11756191_a_at | mannosidase, alpha, class 1C, member 1                                             | MAN1C1     | 5.54 | 4.99 | 6.79 | -1.79 | 2.8E-03 | 0.145 |
| 11731237_at   | zinc finger, DBF-type containing 2                                                 | ZDBF2      | 4.03 | 3.48 | 5.28 | -1.80 | 4.1E-03 | 0.159 |
| 11737749_a_at | serum/glucocorticoid regulated kinase 1                                            | SGK1       | 6.62 | 6.06 | 7.86 | -1.80 | 9.9E-03 | 0.212 |
| 11749407_a_at | ZNF667 antisense RNA 1 (head to head)                                              | ZNF667-AS1 | 4.51 | 3.94 | 5.78 | -1.84 | 5.2E-04 | 0.082 |
| 11731703_x_at | zinc finger protein 551                                                            | ZNF551     | 4.21 | 3.64 | 5.49 | -1.85 | 3.3E-04 | 0.079 |
| 11719155_a_at | DNA-damage regulated autophagy modulator 1                                         | DRAM1      | 2.89 | 2.32 | 4.17 | -1.86 | 3.0E-03 | 0.146 |
| 11723209_s_at | kelch repeat and BTB (POZ) domain containing 6                                     | KBTBD6     | 3.64 | 3.06 | 4.93 | -1.86 | 3.5E-03 | 0.148 |
| 11744162_a_at | dual specificity phosphatase 4                                                     | DUSP4      | 5.63 | 5.05 | 6.93 | -1.87 | 9.3E-03 | 0.211 |
| 11715949_s_at | potassium channel tetramerization domain containing 12                             | KCTD12     | 4.92 | 4.34 | 6.22 | -1.89 | 1.3E-03 | 0.113 |
| 11763531_a_at | methyltransferase like 15                                                          | METTL15    | 5.01 | 4.43 | 6.32 | -1.89 | 3.5E-03 | 0.148 |
| 11758027_s_at | hook microtubule-tethering protein 1                                               | HOOK1      | 3.35 | 2.77 | 4.66 | -1.89 | 2.0E-04 | 0.079 |
| 11756787_a_at | hyaluronan and proteoglycan link protein 3                                         | HAPLN3     | 6.81 | 6.23 | 8.13 | -1.89 | 2.6E-03 | 0.143 |
| 11760058_at   | solute carrier family 3 (amino acid transporter heavy chain), member 1             | SLC3A1     | 4.36 | 3.78 | 5.67 | -1.90 | 3.0E-03 | 0.146 |
| 11734854_a_at | V-set and immunoglobulin domain containing 1                                       | VSIG1      | 7.45 | 6.86 | 8.79 | -1.93 | 6.2E-03 | 0.180 |
| 11754557_s_at | protein kinase C, alpha                                                            | PRKCA      | 5.80 | 5.21 | 7.14 | -1.93 | 4.2E-04 | 0.079 |
| 11725517_x_at | ATP-binding cassette, sub-family G (WHITE), member 1                               | ABCG1      | 7.38 | 6.78 | 8.72 | -1.94 | 8.5E-03 | 0.204 |
| 11715270_s_at | Kruppel-like factor 7 (ubiquitous)                                                 | KLF7       | 8.27 | 7.67 | 9.61 | -1.94 | 8.0E-04 | 0.093 |
| 11758432_s_at | cytoplasmic polyadenylation element binding protein 1                              | CPEB1      | 4.51 | 3.91 | 5.85 | -1.94 | 7.0E-03 | 0.187 |
| 11730192_x_at | SEC14-like 2 (S. cerevisiae)                                                       | SEC14L2    | 5.88 | 5.28 | 7.24 | -1.96 | 6.0E-04 | 0.083 |
| 11752084_a_at | kelch-like family member 6                                                         | KLHL6      | 6.02 | 5.41 | 7.38 | -1.97 | 6.6E-03 | 0.183 |
| 11727300_a_at | fibroblast growth factor receptor 1                                                | FGFR1      | 4.57 | 3.96 | 5.94 | -1.98 | 1.4E-03 | 0.113 |
| 11754769_a_at | BEN domain containing 5                                                            | BEND5      | 4.06 | 3.45 | 5.44 | -1.99 | 1.6E-04 | 0.079 |
| 11720910_a_at | NEL-like 2 (chicken)                                                               | NELL2      | 8.57 | 7.95 | 9.97 | -2.02 | 4.0E-04 | 0.079 |
| 11729655_a_at | SMAD family member 2                                                               | SMAD2      | 5.74 | 5.12 | 7.14 | -2.02 | 8.2E-04 | 0.093 |

|               |                                                                                                        |            |      |      |       |       |         |       |
|---------------|--------------------------------------------------------------------------------------------------------|------------|------|------|-------|-------|---------|-------|
| 11759827_at   | zinc finger protein 154                                                                                | ZNF154     | 4.24 | 3.62 | 5.64  | -2.02 | 7.1E-03 | 0.188 |
| 11756313_x_at | serpin peptidase inhibitor, clade F (alpha-2 antiplasmin, pigment epithelium derived factor), member 1 | SERPINF1   | 5.04 | 4.42 | 6.45  | -2.03 | 1.3E-03 | 0.113 |
| 11763472_x_at | zinc finger CCCH-type containing 12D                                                                   | ZC3H12D    | 7.83 | 7.20 | 9.24  | -2.04 | 5.6E-04 | 0.082 |
| 11753266_a_at | transcription elongation factor A (SII), 3                                                             | TCEA3      | 6.36 | 5.72 | 7.78  | -2.05 | 3.3E-03 | 0.148 |
| 11733867_a_at | major histocompatibility complex, class II, DO alpha                                                   | HLA-DOA    | 6.13 | 5.50 | 7.56  | -2.06 | 1.2E-03 | 0.109 |
| 11725692_a_at | von Willebrand factor A domain containing 5A                                                           | VWA5A      | 3.85 | 3.22 | 5.29  | -2.07 | 5.6E-04 | 0.082 |
| 11733811_a_at | FAST kinase domains 2                                                                                  | FASTKD2    | 4.25 | 3.61 | 5.68  | -2.07 | 2.5E-03 | 0.141 |
| 11728910_a_at | zinc finger protein 615                                                                                | ZNF615     | 5.28 | 4.64 | 6.71  | -2.07 | 6.4E-04 | 0.087 |
| 11717854_a_at | zinc finger and SCAN domain containing 18                                                              | ZSCAN18    | 5.70 | 5.06 | 7.13  | -2.07 | 6.5E-03 | 0.181 |
| 11744855_at   | serpin peptidase inhibitor, clade B (ovalbumin), member 9, pseudogene 1                                | SERPINB9P1 | 6.46 | 5.81 | 7.92  | -2.11 | 1.0E-03 | 0.102 |
| 11744219_at   | G0/G1 switch 2                                                                                         | GOS2       | 5.54 | 4.89 | 7.02  | -2.14 | 1.6E-03 | 0.120 |
| 11741079_x_at | cAMP responsive element modulator                                                                      | CREM       | 8.01 | 7.33 | 9.52  | -2.18 | 8.1E-03 | 0.201 |
| 11724886_a_at | leucine rich repeat neuronal 3                                                                         | LRRN3      | 5.18 | 4.50 | 6.71  | -2.21 | 1.7E-03 | 0.120 |
| 11752913_a_at | sestrin 3                                                                                              | SESN3      | 8.11 | 7.42 | 9.67  | -2.25 | 3.8E-04 | 0.079 |
| 11725492_at   | RAB20, member RAS oncogene family                                                                      | RAB20      | 3.67 | 2.98 | 5.23  | -2.25 | 3.5E-04 | 0.079 |
| 11745722_x_at | four and a half LIM domains 1                                                                          | FHL1       | 4.38 | 3.69 | 5.94  | -2.26 | 4.5E-04 | 0.080 |
| 11734368_s_at | DMRT-like family C1                                                                                    | DMRTC1     | 4.90 | 4.19 | 6.52  | -2.33 | 2.8E-03 | 0.145 |
| 11731019_x_at | allograft inflammatory factor 1                                                                        | AIF1       | 7.65 | 6.92 | 9.27  | -2.35 | 1.8E-03 | 0.120 |
| 11746543_a_at | sorting nexin 9                                                                                        | SNX9       | 6.12 | 5.39 | 7.75  | -2.36 | 3.0E-03 | 0.146 |
| 11725981_at   | chemokine (C-C motif) receptor 7                                                                       | CCR7       | 9.71 | 8.98 | 11.34 | -2.36 | 5.4E-04 | 0.082 |
| 11757812_s_at | inositol polyphosphate-5-phosphatase, 40kDa                                                            | INPP5A     | 8.06 | 7.32 | 9.72  | -2.40 | 1.4E-03 | 0.114 |
| 11727336_at   | sterile alpha motif domain containing 12                                                               | SAMD12     | 5.89 | 5.14 | 7.57  | -2.43 | 5.8E-04 | 0.083 |
| 11726145_at   | carbonic anhydrase VI                                                                                  | CA6        | 4.97 | 4.22 | 6.66  | -2.45 | 6.8E-03 | 0.185 |
| 11747110_a_at | PAS domain containing serine/threonine kinase                                                          | PASK       | 7.97 | 7.20 | 9.71  | -2.51 | 9.1E-05 | 0.075 |
| 11726583_s_at | cytoskeleton-associated protein 4                                                                      | CKAP4      | 6.59 | 5.82 | 8.33  | -2.52 | 3.6E-04 | 0.079 |
| 11734200_at   | zinc finger protein 844                                                                                | ZNF844     | 5.78 | 5.01 | 7.53  | -2.53 | 1.3E-03 | 0.113 |
| 11739942_s_at | Sep (O-phosphoserine) tRNA:Sec (selenocysteine) tRNA synthase                                          | SEPSECS    | 4.37 | 3.60 | 6.12  | -2.53 | 2.0E-04 | 0.079 |
| 11753823_a_at | S100 calcium binding protein A8                                                                        | S100A8     | 5.86 | 5.07 | 7.63  | -2.55 | 4.5E-03 | 0.163 |
| 11740488_x_at | desmocollin 1                                                                                          | DSC1       | 5.98 | 5.17 | 7.80  | -2.63 | 8.4E-04 | 0.093 |
| 11749644_s_at | zinc finger E-box binding homeobox 1                                                                   | ZEB1       | 7.10 | 6.28 | 8.94  | -2.66 | 4.6E-05 | 0.072 |
| 11719372_s_at | nerve growth factor receptor (TNFRSF16) associated protein 1                                           | NGFRAP1    | 7.48 | 6.65 | 9.36  | -2.70 | 2.7E-03 | 0.145 |
| 11718419_at   | Fc fragment of IgE, high affinity I, receptor for; gamma polypeptide                                   | FCER1G     | 5.91 | 5.02 | 7.93  | -2.91 | 3.5E-04 | 0.079 |
| 11728239_at   | Ras-related GTP binding D                                                                              | RRAGD      | 3.90 | 3.00 | 5.93  | -2.93 | 1.6E-03 | 0.120 |
| 11741379_a_at | BTB and CNC homology 1, basic leucine zipper transcription factor 2                                    | BACH2      | 6.17 | 5.26 | 8.22  | -2.95 | 1.7E-04 | 0.079 |
| 11745496_a_at | serine peptidase inhibitor, Kunitz type, 2                                                             | SPINT2     | 7.05 | 6.08 | 9.21  | -3.13 | 3.8E-04 | 0.079 |

|               |                                  |        |      |      |      |       |         |       |
|---------------|----------------------------------|--------|------|------|------|-------|---------|-------|
| 11718841_s_at | chemokine (C-X-C motif) ligand 8 | CXCL8  | 5.15 | 4.16 | 7.39 | -3.23 | 3.0E-04 | 0.079 |
| 11736801_a_at | pleiomorphic adenoma gene 1      | PLAG1  | 4.43 | 3.40 | 6.75 | -3.34 | 5.9E-05 | 0.072 |
| 11728469_a_at | BTB (POZ) domain containing 11   | BTBD11 | 5.46 | 4.43 | 7.78 | -3.35 | 1.7E-03 | 0.120 |

**Supplementary Table S2.** Characterization of CD8<sup>+</sup> T-cell transcriptional signatures from AML patients at diagnosis according to their subsequent response to chemotherapy. Gene expression analysis of PB CD8<sup>+</sup> T-cells from AML patients at diagnosis (pre-treatment) ( $n = 6$ ) according to their subsequent response; complete remission (CR) ( $n = 3$ ) and nonresponders (NR) ( $n = 3$ ). Venn diagram of differentially expressed gene sets by CD8<sup>+</sup> T-cells for pre-treatment AML CR versus NR patient comparison (red circle) and post-treatment AML CR versus NR patient comparison (yellow, downregulated; and blue; upregulated). Only 7 overlapping genes were identified between the data sets and presented in accompanying tables. The remaining differentially expressed genes (195) for pre-treatment comparison are also listed to the right.

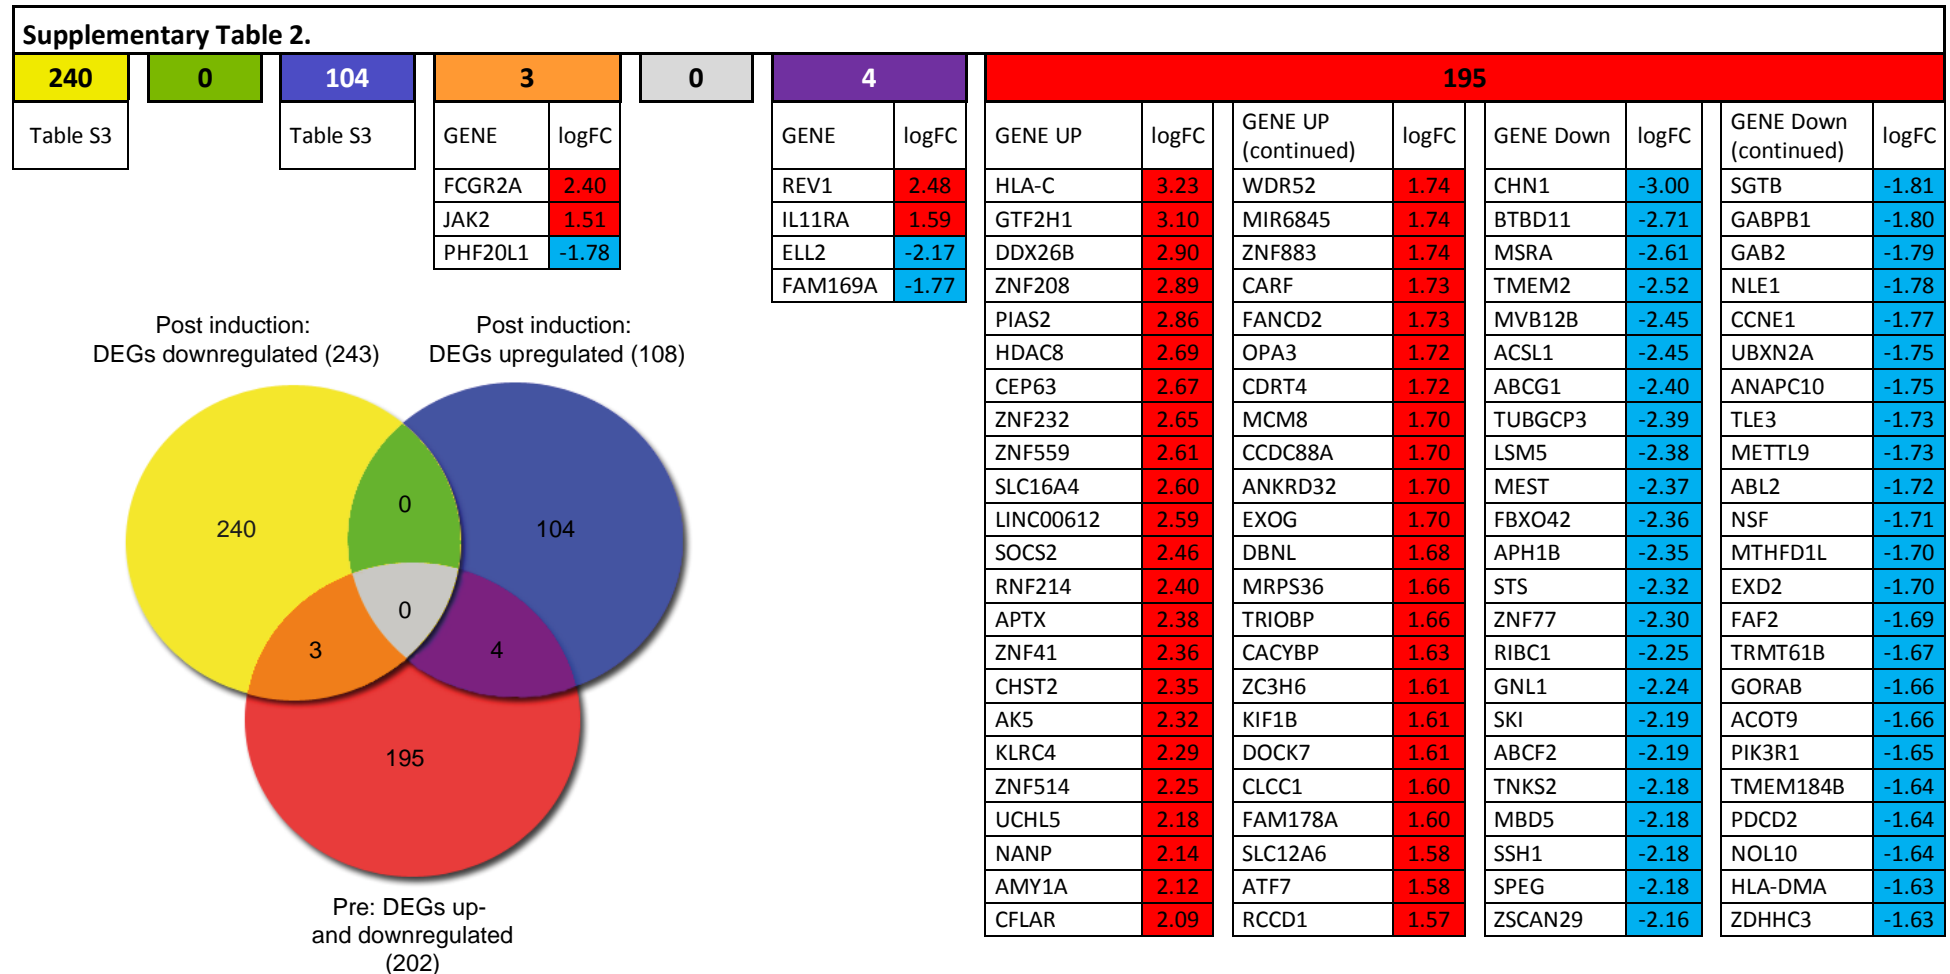



|          |      |           |      |         |       |          |       |
|----------|------|-----------|------|---------|-------|----------|-------|
| CAPRIN2  | 2.08 | SLFN13    | 1.57 | ZNF805  | -2.15 | SLA2     | -1.60 |
| NIT1     | 2.08 | BPNT1     | 1.53 | UBR5    | -2.12 | RCAN1    | -1.59 |
| ITGB1    | 2.06 | PRH1-PRR4 | 1.52 | ZNF367  | -2.10 | HDAC6    | -1.59 |
| C11orf65 | 2.05 | GCFC2     | 1.52 | POLR1B  | -2.10 | TRAPPC11 | -1.58 |
| VPS45    | 2.04 | ATG2B     | 1.52 | PDE4D   | -2.10 | SEPHS1   | -1.58 |
| MYO6     | 2.03 | LRRC8D    | 1.50 | SH3TC1  | -2.07 | RRP15    | -1.57 |
| CELF4    | 2.01 | HIST1H2BJ | 1.50 | BTBD10  | -2.07 | ARL1     | -1.56 |
| RGS3     | 2.00 | RAB11FIP1 | 1.49 | HIPK2   | -2.06 | FAM177A1 | -1.56 |
| SEPT8    | 1.97 | PLEKHB1   | 1.48 | CREM    | -2.04 | TMEM241  | -1.56 |
| ATP10D   | 1.97 | FRY       | 1.46 | USP30   | -2.03 | MCOLN2   | -1.52 |
| TRAC     | 1.95 | TBC1D2B   | 1.46 | ZC3H7B  | -2.03 | CCDC174  | -1.51 |
| GINS1    | 1.95 | INTS3     | 1.46 | RRM2B   | -2.01 | SLC19A2  | -1.50 |
| ATP8B1   | 1.95 | WSB1      | 1.43 | NCOA7   | -1.99 | MTFR2    | -1.50 |
| WDR92    | 1.94 | VANGL1    | 1.43 | TMEM242 | -1.97 | NBPF1    | -1.50 |
| ZNF83    | 1.89 | PACRGL    | 1.40 | PRKCE   | -1.97 | PRMT5    | -1.49 |
| SSBP2    | 1.88 | XYLT1     | 1.40 | CEP76   | -1.97 | PSMD12   | -1.45 |
| SLC38A9  | 1.88 | SPON2     | 1.39 | RANBP2  | -1.96 | PHF12    | -1.44 |
| SLC17A5  | 1.87 | UVSSA     | 1.35 | PAPSS2  | -1.95 | ZER1     | -1.44 |
| PDE4DIP  | 1.87 | C15orf39  | 1.35 | TYW1    | -1.94 | NUPL1    | -1.40 |
| DGKH     | 1.87 | C14orf93  | 1.34 | TGFB3   | -1.94 | HUS1     | -1.40 |
| CDKN3    | 1.83 | FARSB     | 1.33 | FANCM   | -1.93 | REXO4    | -1.38 |
| CASP10   | 1.81 | MSH5      | 1.33 | RPS28   | -1.91 | HMGXB4   | -1.37 |
| SNX11    | 1.81 | DLEC1     | 1.32 | DDA1    | -1.82 | HERPUD1  | -1.35 |
| COX15    | 1.79 | STMN3     | 1.32 | USP37   | -1.82 | ZRANB1   | -1.35 |
| SPICE1   | 1.74 | ELAC1     | 1.26 | WDR44   | -1.81 | ZBED4    | -1.34 |
|          |      |           |      | ZNF778  | -1.81 | TIMM8A   | -1.33 |
|          |      |           |      |         |       | ARID5B   | -1.32 |

**Supplementary Table S3.** *Differentially expressed genes in CR relative to NR AML patients post induction chemotherapy.*

| ID            | NAME                                                                             | GENE      | A    | CR   | NR   | LOG2FC | PVAL    | FDR   |
|---------------|----------------------------------------------------------------------------------|-----------|------|------|------|--------|---------|-------|
| 11729555_a_at | sushi domain containing 4                                                        | SUSD4     | 4.91 | 6.98 | 2.83 | 4.14   | 6.3E-05 | 0.057 |
| 11723236_at   | interferon-induced protein 44-like                                               | IFI44L    | 5.49 | 7.39 | 3.60 | 3.79   | 3.4E-03 | 0.203 |
| 11761557_at   | DEAD (Asp-Glu-Ala-Asp) box polypeptide 47                                        | DDX47     | 5.87 | 7.63 | 4.11 | 3.52   | 1.9E-03 | 0.172 |
| 11763326_s_at | fer (fps/fes related) tyrosine kinase                                            | FER       | 5.53 | 7.27 | 3.78 | 3.48   | 8.7E-04 | 0.145 |
| 11723952_at   | keratin 1                                                                        | KRT1      | 5.20 | 6.92 | 3.48 | 3.44   | 6.3E-03 | 0.246 |
| 11736977_x_at | zinc finger protein 431                                                          | ZNF431    | 5.52 | 7.21 | 3.82 | 3.39   | 7.2E-05 | 0.058 |
| 11725797_a_at | ubiquitin specific peptidase 46                                                  | USP46     | 6.53 | 8.13 | 4.92 | 3.21   | 3.0E-03 | 0.201 |
| 11738262_a_at | autism susceptibility candidate 2                                                | AUTS2     | 6.55 | 8.13 | 4.96 | 3.17   | 3.0E-03 | 0.201 |
| 11762445_a_at | chromosome 14 open reading frame 182                                             | C14orf182 | 5.50 | 7.06 | 3.94 | 3.12   | 1.1E-03 | 0.157 |
| 11731360_a_at | inducible T-cell co-stimulator                                                   | ICOS      | 7.70 | 9.25 | 6.14 | 3.11   | 8.5E-04 | 0.145 |
| 11739685_a_at | exocyst complex component 6B                                                     | EXOC6B    | 5.66 | 7.20 | 4.11 | 3.09   | 1.8E-03 | 0.169 |
| 11762083_at   | casein kinase 2, alpha 1 polypeptide                                             | CSNK2A1   | 4.90 | 6.44 | 3.35 | 3.09   | 1.1E-03 | 0.157 |
| 11753580_s_at | small EDRK-rich factor 1A (telomeric)                                            | SERF1A    | 6.24 | 7.75 | 4.73 | 3.02   | 1.5E-03 | 0.158 |
| 11756058_a_at | carcinoembryonic antigen-related cell adhesion molecule 1 (biliary glycoprotein) | CEACAM1   | 5.78 | 7.28 | 4.28 | 3.01   | 2.3E-03 | 0.187 |
| 11725928_s_at | neurofilament, light polypeptide                                                 | NEFL      | 4.67 | 6.17 | 3.16 | 3.00   | 3.0E-03 | 0.201 |
| 11720597_s_at | cysteine-serine-rich nuclear protein 2                                           | CSRNP2    | 5.31 | 6.79 | 3.83 | 2.96   | 1.3E-03 | 0.158 |
| 11734985_at   | ELK4, ETS-domain protein (SRF accessory protein 1)                               | ELK4      | 3.67 | 5.13 | 2.21 | 2.92   | 2.4E-03 | 0.189 |
| 11759281_at   | serine incorporator 5                                                            | SERINC5   | 7.77 | 9.22 | 6.31 | 2.91   | 5.2E-03 | 0.228 |
| 11728067_at   | prostaglandin D2 receptor 2                                                      | PTGDR2    | 6.83 | 8.28 | 5.38 | 2.90   | 6.0E-03 | 0.238 |
| 11760468_at   | REV1, polymerase (DNA directed)                                                  | REV1      | 4.32 | 5.76 | 2.89 | 2.87   | 9.8E-04 | 0.151 |
| 11729907_a_at | methyltransferase like 15                                                        | METTL15   | 5.52 | 6.93 | 4.12 | 2.81   | 7.6E-03 | 0.262 |
| 11736720_at   | chemokine (C-C motif) receptor 4                                                 | CCR4      | 6.91 | 8.30 | 5.52 | 2.78   | 3.6E-03 | 0.208 |
| 11755239_a_at | elongation factor, RNA polymerase II, 2                                          | ELL2      | 4.89 | 6.28 | 3.50 | 2.77   | 2.1E-03 | 0.180 |
| 11730307_a_at | RIC3 acetylcholine receptor chaperone                                            | RIC3      | 5.83 | 7.21 | 4.45 | 2.76   | 1.3E-03 | 0.158 |
| 11740345_at   | sorting nexin 29                                                                 | SNX29     | 6.12 | 7.50 | 4.74 | 2.76   | 1.7E-03 | 0.168 |
| 11730666_at   | forkhead box P1                                                                  | FOXP1     | 5.96 | 7.33 | 4.58 | 2.75   | 8.1E-03 | 0.262 |
| 11727341_a_at | autophagy related 9B                                                             | ATG9B     | 5.67 | 7.04 | 4.29 | 2.75   | 1.6E-03 | 0.167 |
| 11753266_a_at | transcription elongation factor A (SII), 3                                       | TCEA3     | 7.49 | 8.83 | 6.15 | 2.68   | 7.0E-03 | 0.258 |
| 11752420_x_at | nuclear pore complex interacting protein family, member B6                       | NPIP6     | 6.29 | 7.63 | 4.96 | 2.67   | 5.3E-04 | 0.125 |
| 11730637_a_at | cytotoxic T-lymphocyte-associated protein 4                                      | CTLA4     | 6.26 | 7.56 | 4.96 | 2.60   | 6.9E-03 | 0.258 |
| 11758629_s_at | spectrin, beta, non-erythrocytic 1                                               | SPTBN1    | 6.27 | 7.57 | 4.97 | 2.60   | 2.6E-03 | 0.190 |
| 11728763_x_at | galactose-3-O-sulfotransferase 4                                                 | GAL3ST4   | 5.86 | 7.16 | 4.56 | 2.60   | 8.3E-03 | 0.262 |

|               |                                                                          |             |      |       |      |      |         |       |
|---------------|--------------------------------------------------------------------------|-------------|------|-------|------|------|---------|-------|
| 11729766_x_at | zinc finger protein 331                                                  | ZNF331      | 7.84 | 9.12  | 6.55 | 2.57 | 2.4E-03 | 0.189 |
| 11759932_at   | CDC-like kinase 4                                                        | CLK4        | 5.37 | 6.64  | 4.11 | 2.52 | 2.0E-03 | 0.175 |
| 11757973_x_at | N-myristoyltransferase 2                                                 | NMT2        | 6.42 | 7.67  | 5.17 | 2.51 | 2.6E-03 | 0.190 |
| 11759586_s_at | RAB18, member RAS oncogene family                                        | RAB18       | 6.56 | 7.80  | 5.32 | 2.49 | 3.7E-03 | 0.210 |
| 11726964_at   | synaptic Ras GTPase activating protein 1                                 | SYNGAP1     | 6.53 | 7.77  | 5.29 | 2.49 | 4.1E-03 | 0.214 |
| 11737677_at   | BTB (POZ) domain containing 18                                           | BTBD18      | 5.28 | 6.52  | 4.04 | 2.48 | 5.4E-03 | 0.231 |
| 11762601_x_at | NADH dehydrogenase (ubiquinone) 1 beta subcomplex, 8, 19kDa              | NDUFB8      | 5.49 | 6.73  | 4.26 | 2.47 | 8.1E-03 | 0.262 |
| 11750468_a_at | nucleoporin 35kDa                                                        | NUP35       | 5.92 | 7.14  | 4.69 | 2.45 | 3.0E-03 | 0.201 |
| 11760630_at   | ring finger protein 43                                                   | RNF43       | 4.99 | 6.19  | 3.78 | 2.41 | 1.4E-03 | 0.158 |
| 11745063_x_at | leucine rich repeat containing 8 family, member B                        | LRRC8B      | 5.55 | 6.74  | 4.36 | 2.38 | 4.7E-03 | 0.219 |
| 11763025_a_at | mucin 1, cell surface associated                                         | MUC1        | 6.54 | 7.73  | 5.35 | 2.38 | 9.1E-03 | 0.266 |
| 11756458_a_at | MSH5-SAPCD1 readthrough (NMD candidate)                                  | MSH5-SAPCD1 | 6.74 | 7.93  | 5.55 | 2.38 | 8.4E-03 | 0.262 |
| 11749137_a_at | family with sequence similarity 169, member A                            | FAM169A     | 6.78 | 7.96  | 5.61 | 2.34 | 9.6E-03 | 0.273 |
| 11747527_a_at | zinc finger protein 275                                                  | ZNF275      | 6.26 | 7.43  | 5.09 | 2.34 | 2.5E-03 | 0.189 |
| 11721024_a_at | interleukin 11 receptor, alpha                                           | IL11RA      | 7.07 | 8.23  | 5.90 | 2.33 | 1.7E-03 | 0.168 |
| 11728988_at   | fumarylacetoacetate hydrolase domain containing 2B                       | FAHD2B      | 4.76 | 5.93  | 3.60 | 2.33 | 1.7E-03 | 0.168 |
| 11763366_s_at | ankyrin repeat domain 36B                                                | ANKRD36B    | 5.71 | 6.87  | 4.55 | 2.32 | 3.5E-03 | 0.204 |
| 11719527_a_at | F-box and leucine-rich repeat protein 16                                 | FBXL16      | 6.14 | 7.29  | 4.98 | 2.31 | 6.5E-03 | 0.252 |
| 11759966_at   | inositol-trisphosphate 3-kinase B                                        | ITPKB       | 6.81 | 7.96  | 5.66 | 2.30 | 8.9E-03 | 0.262 |
| 11736300_a_at | ORMDL sphingolipid biosynthesis regulator 1                              | ORMDL1      | 5.74 | 6.89  | 4.60 | 2.29 | 4.1E-03 | 0.214 |
| 11740146_a_at | tRNA methyltransferase 10 homolog A (S. cerevisiae)                      | TRMT10A     | 5.28 | 6.42  | 4.14 | 2.28 | 7.8E-03 | 0.262 |
| 11720028_x_at | low density lipoprotein receptor                                         | LDLR        | 5.84 | 6.98  | 4.71 | 2.27 | 9.0E-03 | 0.264 |
| 11761077_at   | sparc/osteonectin, cwcv and kazal-like domains proteoglycan (testican) 2 | SPOCK2      | 6.42 | 7.56  | 5.29 | 2.27 | 7.1E-03 | 0.258 |
| 11759991_at   | craniofacial development protein 1                                       | CFDP1       | 4.66 | 5.79  | 3.53 | 2.26 | 8.5E-03 | 0.262 |
| 11717471_at   | protein kinase C, alpha                                                  | PRKCA       | 8.81 | 9.94  | 7.69 | 2.25 | 8.9E-03 | 0.262 |
| 11735380_s_at | olfactory receptor, family 2, subfamily A, member 4                      | OR2A4       | 5.30 | 6.43  | 4.17 | 2.25 | 5.2E-03 | 0.228 |
| 11724218_s_at | G patch domain containing 2                                              | GPATCH2     | 6.11 | 7.24  | 4.98 | 2.25 | 9.9E-03 | 0.276 |
| 11724472_at   | squamous cell carcinoma antigen recognized by T cells                    | SART1       | 5.38 | 6.50  | 4.26 | 2.24 | 3.1E-03 | 0.203 |
| 11748184_a_at | neuroligin 3                                                             | NLGN3       | 6.79 | 7.91  | 5.68 | 2.23 | 2.0E-03 | 0.175 |
| 11753579_a_at | interleukin 6 signal transducer                                          | IL6ST       | 9.30 | 10.41 | 8.19 | 2.22 | 3.7E-03 | 0.210 |
| 11744408_x_at | golgin A8 family, member A                                               | GOLGA8A     | 7.68 | 8.79  | 6.58 | 2.21 | 4.0E-03 | 0.214 |
| 11746635_a_at | lymphoid enhancer-binding factor 1                                       | LEF1        | 9.49 | 10.59 | 8.39 | 2.20 | 5.8E-03 | 0.235 |
| 11763763_a_at | diacylglycerol kinase, alpha 80kDa                                       | DGKA        | 6.86 | 7.95  | 5.76 | 2.19 | 4.4E-03 | 0.218 |
| 11736352_at   | transmembrane protein 220                                                | TMEM220     | 4.69 | 5.78  | 3.60 | 2.18 | 3.2E-03 | 0.203 |
| 11745624_s_at | InaD-like (Drosophila)                                                   | INADL       | 6.10 | 7.19  | 5.02 | 2.18 | 5.6E-03 | 0.233 |
| 11760126_at   | THO complex 3                                                            | THOC3       | 5.61 | 6.69  | 4.53 | 2.15 | 4.1E-03 | 0.214 |

|               |                                                                                  |           |      |      |      |      |         |       |
|---------------|----------------------------------------------------------------------------------|-----------|------|------|------|------|---------|-------|
| 11731881_a_at | protein phosphatase 2, regulatory subunit A, beta                                | PPP2R1B   | 5.48 | 6.56 | 4.41 | 2.15 | 3.2E-03 | 0.203 |
| 11735627_x_at | zinc finger protein 841                                                          | ZNF841    | 6.41 | 7.48 | 5.33 | 2.15 | 7.1E-03 | 0.258 |
| 11723584_x_at | Rac GTPase activating protein 1                                                  | RACGAP1   | 5.80 | 6.87 | 4.73 | 2.14 | 5.3E-03 | 0.228 |
| 11747127_a_at | regulation of nuclear pre-mRNA domain containing 1B                              | RPRD1B    | 5.47 | 6.54 | 4.40 | 2.14 | 7.3E-03 | 0.258 |
| 11719948_at   | GRIP and coiled-coil domain containing 1                                         | GCC1      | 5.83 | 6.90 | 4.76 | 2.13 | 8.5E-03 | 0.262 |
| 11752492_a_at | activin A receptor, type IIA                                                     | ACVR2A    | 6.41 | 7.46 | 5.36 | 2.10 | 6.8E-03 | 0.258 |
| 11749723_a_at | fucosyltransferase 8 (alpha (1,6) fucosyltransferase)                            | FUT8      | 7.66 | 8.71 | 6.61 | 2.10 | 5.1E-03 | 0.227 |
| 11724285_at   | FERM domain containing 4A                                                        | FRMD4A    | 5.36 | 6.41 | 4.32 | 2.09 | 6.7E-03 | 0.257 |
| 11749825_a_at | septin 6                                                                         | Sep.06    | 8.80 | 9.84 | 7.75 | 2.09 | 6.9E-03 | 0.258 |
| 11761134_at   | K(lysine) acetyltransferase 6A                                                   | KAT6A     | 4.79 | 5.83 | 3.75 | 2.08 | 5.7E-03 | 0.234 |
| 11719575_x_at | RAD50 interactor 1                                                               | RINT1     | 5.80 | 6.84 | 4.76 | 2.08 | 4.9E-03 | 0.225 |
| 11747427_a_at | SEC14-like 2 (S. cerevisiae)                                                     | SEC14L2   | 5.05 | 6.08 | 4.01 | 2.07 | 9.7E-03 | 0.273 |
| 11756814_a_at | ATP-binding cassette, sub-family B (MDR/TAP), member 8                           | ABCB8     | 5.90 | 6.93 | 4.87 | 2.06 | 4.6E-03 | 0.219 |
| 11736628_s_at | Rho guanine nucleotide exchange factor (GEF) 34, pseudogene                      | ARHGEF34P | 4.91 | 5.94 | 3.88 | 2.06 | 3.5E-03 | 0.206 |
| 11751687_a_at | ER degradation enhancer, mannosidase alpha-like 1                                | EDEM1     | 6.26 | 7.28 | 5.24 | 2.04 | 9.1E-03 | 0.266 |
| 11724107_s_at | mitochondrial ribosomal protein S31 pseudogene 5                                 | MRPS31P5  | 6.62 | 7.64 | 5.60 | 2.04 | 8.3E-03 | 0.262 |
| 11722997_s_at | nucleolar protein 11                                                             | NOL11     | 7.10 | 8.11 | 6.08 | 2.03 | 8.0E-03 | 0.262 |
| 11741895_a_at | OTU deubiquitinase 4                                                             | OTUD4     | 5.73 | 6.74 | 4.73 | 2.01 | 8.1E-03 | 0.262 |
| 11747964_a_at | solute carrier family 4, sodium bicarbonate cotransporter, member 7              | SLC4A7    | 6.94 | 7.94 | 5.93 | 2.01 | 5.3E-03 | 0.229 |
| 11739953_at   | zinc finger protein 14                                                           | ZNF14     | 5.18 | 6.18 | 4.17 | 2.01 | 8.6E-03 | 0.262 |
| 11761177_at   | dihydrolipoamide S-succinyltransferase (E2 component of 2-oxo-glutarate complex) | DLST      | 6.04 | 7.04 | 5.04 | 2.00 | 6.0E-03 | 0.238 |
| 11747110_a_at | PAS domain containing serine/threonine kinase                                    | PASK      | 8.20 | 9.20 | 7.21 | 2.00 | 8.8E-03 | 0.262 |
| 11749380_a_at | WD repeat domain 74                                                              | WDR74     | 6.24 | 7.23 | 5.25 | 1.98 | 3.8E-03 | 0.212 |
| 11739690_a_at | DDB1 and CUL4 associated factor 11                                               | DCAF11    | 6.72 | 7.71 | 5.74 | 1.97 | 8.8E-03 | 0.262 |
| 11745853_a_at | ring finger protein 145                                                          | RNF145    | 5.49 | 6.47 | 4.51 | 1.96 | 8.4E-03 | 0.262 |
| 11751388_a_at | flap structure-specific endonuclease 1                                           | FEN1      | 3.99 | 4.96 | 3.02 | 1.94 | 4.7E-03 | 0.219 |
| 11756787_a_at | hyaluronan and proteoglycan link protein 3                                       | HAPLN3    | 7.35 | 8.32 | 6.38 | 1.94 | 5.7E-03 | 0.234 |
| 11761001_at   | Rh blood group, D antigen                                                        | RHD       | 5.59 | 6.55 | 4.62 | 1.94 | 6.3E-03 | 0.246 |
| 11763686_x_at | formin-like 1                                                                    | FMNL1     | 5.33 | 6.28 | 4.37 | 1.91 | 5.6E-03 | 0.233 |
| 11721089_a_at | YLP motif containing 1                                                           | YLPM1     | 7.91 | 8.86 | 6.95 | 1.90 | 7.4E-03 | 0.261 |
| 11761834_at   | embryonic ectoderm development                                                   | EED       | 4.21 | 5.15 | 3.26 | 1.89 | 7.4E-03 | 0.261 |
| 11717960_a_at | potassium channel tetramerization domain containing 2                            | KCTD2     | 6.43 | 7.37 | 5.49 | 1.88 | 1.0E-02 | 0.276 |
| 11734955_a_at | sex comb on midleg-like 1 (Drosophila)                                           | SCML1     | 3.84 | 4.77 | 2.91 | 1.86 | 5.6E-03 | 0.233 |
| 11761431_at   | phosphoglycerate mutase family member 5                                          | PGAM5     | 4.69 | 5.61 | 3.77 | 1.85 | 6.0E-03 | 0.238 |
| 11751206_s_at | aurora kinase A                                                                  | AURKA     | 4.55 | 5.47 | 3.63 | 1.84 | 7.3E-03 | 0.258 |

|               |                                                                        |          |      |      |      |       |         |       |
|---------------|------------------------------------------------------------------------|----------|------|------|------|-------|---------|-------|
| 11717532_at   | mannosidase, alpha, class 2A, member 2                                 | MAN2A2   | 7.03 | 7.95 | 6.11 | 1.84  | 9.9E-03 | 0.276 |
| 11721794_a_at | complement component (3d/Epstein Barr virus) receptor 2                | CR2      | 4.38 | 5.30 | 3.47 | 1.82  | 9.5E-03 | 0.269 |
| 11728686_a_at | sideroflexin 1                                                         | SFXN1    | 7.02 | 7.91 | 6.13 | 1.78  | 7.3E-03 | 0.258 |
| 11750362_a_at | cyclin N-terminal domain containing 1                                  | CNTD1    | 4.45 | 5.34 | 3.56 | 1.77  | 7.0E-03 | 0.258 |
| 11734982_a_at | G protein-coupled receptor associated sorting protein 1                | GPRASP1  | 5.97 | 6.85 | 5.08 | 1.77  | 9.2E-03 | 0.267 |
| 11754505_a_at | solute carrier family 39 (zinc transporter), member 4                  | SLC39A4  | 6.77 | 5.92 | 7.63 | -1.71 | 9.6E-03 | 0.273 |
| 11723111_a_at | elastin microfibril interfacier 2                                      | EMILIN2  | 7.09 | 6.22 | 7.96 | -1.74 | 7.7E-03 | 0.262 |
| 11722064_at   | receptor accessory protein 3                                           | REEP3    | 6.41 | 5.53 | 7.28 | -1.75 | 9.7E-03 | 0.274 |
| 11752622_a_at | PX domain containing serine/threonine kinase                           | PXK      | 7.33 | 6.43 | 8.22 | -1.80 | 8.9E-03 | 0.262 |
| 11742191_a_at | runt-related transcription factor 1                                    | RUNX1    | 7.08 | 6.18 | 7.98 | -1.80 | 8.1E-03 | 0.262 |
| 11716104_a_at | myelin protein zero-like 1                                             | MPZL1    | 6.28 | 5.36 | 7.20 | -1.84 | 8.6E-03 | 0.262 |
| 11717338_a_at | cut-like homeobox 1                                                    | CUX1     | 6.20 | 5.28 | 7.12 | -1.84 | 9.4E-03 | 0.269 |
| 11748175_x_at | chromosome 19 open reading frame 54                                    | C19orf54 | 7.60 | 6.68 | 8.53 | -1.85 | 7.8E-03 | 0.262 |
| 11720624_a_at | myeloid differentiation primary response 88                            | MYD88    | 8.61 | 7.69 | 9.54 | -1.85 | 9.4E-03 | 0.269 |
| 11721151_s_at | RAB40C, member RAS oncogene family                                     | RAB40C   | 6.71 | 5.79 | 7.64 | -1.86 | 8.3E-03 | 0.262 |
| 11759424_at   | annexin A5                                                             | ANXA5    | 4.88 | 3.94 | 5.81 | -1.87 | 8.3E-03 | 0.262 |
| 11730128_a_at | SET domain containing 9                                                | SETD9    | 3.99 | 3.04 | 4.94 | -1.90 | 1.0E-02 | 0.276 |
| 11736156_a_at | family with sequence similarity 168, member A                          | FAM168A  | 6.99 | 6.04 | 7.94 | -1.91 | 6.7E-03 | 0.257 |
| 11725980_at   | complement factor D (adipsin)                                          | CFD      | 7.26 | 6.30 | 8.21 | -1.91 | 8.8E-03 | 0.262 |
| 11751578_a_at | tetratricopeptide repeat domain 31                                     | TTC31    | 6.32 | 5.37 | 7.27 | -1.91 | 8.4E-03 | 0.262 |
| 11756347_x_at | proline rich 11                                                        | PRR11    | 6.02 | 5.06 | 6.98 | -1.92 | 4.8E-03 | 0.224 |
| 11716718_at   | galactosidase, alpha                                                   | GLA      | 7.15 | 6.19 | 8.12 | -1.93 | 5.9E-03 | 0.237 |
| 11732797_x_at | KIAA1841                                                               | KIAA1841 | 4.01 | 3.04 | 4.97 | -1.93 | 5.1E-03 | 0.227 |
| 11725351_x_at | KIAA0930                                                               | KIAA0930 | 6.31 | 5.34 | 7.27 | -1.94 | 7.8E-03 | 0.262 |
| 11725316_x_at | VAMP (vesicle-associated membrane protein)-associated protein A, 33kDa | VAPA     | 4.71 | 3.74 | 5.68 | -1.95 | 8.6E-03 | 0.262 |
| 11745928_a_at | transmembrane protein 68                                               | TMEM68   | 5.04 | 4.06 | 6.02 | -1.96 | 8.8E-03 | 0.262 |
| 11755915_a_at | Hermansky-Pudlak syndrome 3                                            | HPS3     | 6.71 | 5.73 | 7.69 | -1.96 | 8.3E-03 | 0.262 |
| 11716870_a_at | polyhomeotic homolog 2 (Drosophila)                                    | PHC2     | 7.37 | 6.39 | 8.36 | -1.97 | 4.5E-03 | 0.219 |
| 11742824_a_at | microRNA 4723                                                          | MIR4723  | 7.54 | 6.55 | 8.53 | -1.98 | 8.9E-03 | 0.262 |
| 11755464_a_at | TBC1 domain family, member 31                                          | TBC1D31  | 6.12 | 5.13 | 7.12 | -1.99 | 8.1E-03 | 0.262 |
| 11716323_at   | isoprenylcysteine carboxyl methyltransferase                           | ICMT     | 6.12 | 5.12 | 7.11 | -1.99 | 8.0E-03 | 0.262 |
| 11716580_s_at | cysteine-rich transmembrane module containing 1                        | CYSTM1   | 7.00 | 6.00 | 8.00 | -2.00 | 7.2E-03 | 0.258 |
| 11716595_s_at | solute carrier family 44 (choline transporter), member 1               | SLC44A1  | 6.21 | 5.21 | 7.21 | -2.00 | 3.8E-03 | 0.212 |
| 11753600_x_at | H1 histone family, member 0                                            | H1F0     | 7.38 | 6.37 | 8.38 | -2.01 | 7.2E-03 | 0.258 |
| 11726258_at   | ring finger protein 141                                                | RNF141   | 6.58 | 5.57 | 7.58 | -2.01 | 3.9E-03 | 0.213 |
| 11723409_s_at | McKusick-Kaufman syndrome                                              | MKKS     | 5.95 | 4.94 | 6.96 | -2.02 | 3.4E-03 | 0.203 |

|               |                                                             |          |       |      |       |       |         |       |
|---------------|-------------------------------------------------------------|----------|-------|------|-------|-------|---------|-------|
| 11723221_a_at | exocyst complex component 6                                 | EXOC6    | 6.07  | 5.05 | 7.09  | -2.04 | 5.4E-03 | 0.231 |
| 11725995_x_at | xyloside xylosyltransferase 1                               | XXYL1    | 4.90  | 3.88 | 5.93  | -2.04 | 7.5E-03 | 0.261 |
| 11756028_a_at | glycerophosphodiester phosphodiesterase domain containing 1 | GDPD1    | 4.76  | 3.74 | 5.79  | -2.05 | 6.6E-03 | 0.254 |
| 11730720_a_at | neural cell adhesion molecule 1                             | NCAM1    | 6.07  | 5.04 | 7.10  | -2.06 | 6.5E-03 | 0.250 |
| 11747801_a_at | histone deacetylase 9                                       | HDAC9    | 4.08  | 3.05 | 5.11  | -2.06 | 4.3E-03 | 0.216 |
| 11758037_s_at | myotubularin related protein 12                             | MTMR12   | 6.71  | 5.68 | 7.74  | -2.07 | 7.8E-03 | 0.262 |
| 11755889_at   | zinc finger protein 407                                     | ZNF407   | 4.37  | 3.34 | 5.41  | -2.07 | 8.3E-03 | 0.262 |
| 11763382_a_at | numb homolog (Drosophila)                                   | NUMB     | 6.30  | 5.26 | 7.34  | -2.08 | 6.8E-03 | 0.258 |
| 11745916_x_at | zinc finger protein 549                                     | ZNF549   | 4.51  | 3.47 | 5.56  | -2.09 | 6.0E-03 | 0.239 |
| 11757367_s_at | heat shock 70kDa protein 6 (HSP70B')                        | HSPA6    | 6.14  | 5.09 | 7.19  | -2.09 | 9.3E-03 | 0.268 |
| 11740581_s_at | N-acylsphingosine amidohydrolase (acid ceramidase) 1        | ASAH1    | 7.88  | 6.83 | 8.93  | -2.10 | 3.1E-03 | 0.203 |
| 11734777_a_at | phosphatidylcholine transfer protein                        | PCTP     | 6.00  | 4.94 | 7.05  | -2.11 | 4.1E-03 | 0.214 |
| 11723106_a_at | neutrophil cytosolic factor 4, 40kDa                        | NCF4     | 8.15  | 7.09 | 9.21  | -2.11 | 5.9E-03 | 0.238 |
| 11759642_x_at | major histocompatibility complex, class II, DR beta 1       | HLA-DRB1 | 10.18 | 9.12 | 11.23 | -2.11 | 9.2E-03 | 0.267 |
| 11744939_x_at | chromosome 11 open reading frame 74                         | C11orf74 | 5.40  | 4.33 | 6.46  | -2.12 | 3.1E-03 | 0.203 |
| 11717937_at   | small integral membrane protein 3                           | SMIM3    | 5.67  | 4.61 | 6.74  | -2.12 | 2.7E-03 | 0.190 |
| 11758417_s_at | major histocompatibility complex, class II, DP alpha 1      | HLA-DPA1 | 9.82  | 8.75 | 10.90 | -2.15 | 7.2E-03 | 0.258 |
| 11723194_x_at | major histocompatibility complex, class II, DQ beta 1       | HLA-DQB1 | 10.20 | 9.12 | 11.28 | -2.16 | 8.6E-03 | 0.262 |
| 11721897_a_at | DEXH (Asp-Glu-X-His) box polypeptide 58                     | DHX58    | 6.93  | 5.83 | 8.02  | -2.19 | 4.4E-03 | 0.218 |
| 11721735_at   | dehydrogenase E1 and transketolase domain containing 1      | DHTKD1   | 5.33  | 4.24 | 6.43  | -2.19 | 2.9E-03 | 0.198 |
| 11727754_a_at | phospholipase A2, group IVA (cytosolic, calcium-dependent)  | PLA2G4A  | 3.90  | 2.80 | 5.01  | -2.21 | 5.2E-03 | 0.227 |
| 11745804_s_at | LIM and senescent cell antigen-like domains 1               | LIMS1    | 6.68  | 5.57 | 7.79  | -2.22 | 4.3E-03 | 0.217 |
| 11728228_at   | hepatitis A virus cellular receptor 2                       | HAVCR2   | 5.32  | 4.21 | 6.43  | -2.22 | 6.8E-03 | 0.258 |
| 11719523_s_at | torsin family 1, member B (torsin B)                        | TOR1B    | 6.81  | 5.70 | 7.92  | -2.22 | 5.1E-03 | 0.227 |
| 11718447_s_at | SH3 domain binding glutamate-rich protein like 2            | SH3BGR2  | 4.85  | 3.73 | 5.96  | -2.23 | 3.0E-03 | 0.201 |
| 11756527_a_at | sorting nexin 10                                            | SNX10    | 4.63  | 3.51 | 5.75  | -2.23 | 2.6E-03 | 0.190 |
| 11723696_at   | Fli-1 proto-oncogene, ETS transcription factor              | FLI1     | 5.56  | 4.44 | 6.68  | -2.24 | 8.4E-03 | 0.262 |
| 11756138_a_at | hexokinase 2                                                | HK2      | 5.94  | 4.81 | 7.07  | -2.26 | 8.7E-03 | 0.262 |
| 11718121_x_at | ATPase, H+ transporting, lysosomal 70kDa, V1 subunit A      | ATP6V1A  | 4.35  | 3.22 | 5.49  | -2.28 | 2.7E-03 | 0.190 |
| 11758881_x_at | ribosomal protein S15a                                      | RPS15A   | 6.46  | 5.32 | 7.60  | -2.28 | 5.0E-03 | 0.226 |
| 11763266_at   | family with sequence similarity 120B                        | FAM120B  | 5.77  | 4.62 | 6.92  | -2.29 | 9.8E-03 | 0.274 |
| 11756947_a_at | cathepsin B                                                 | CTSB     | 9.03  | 7.88 | 10.18 | -2.30 | 8.7E-03 | 0.262 |
| 11726272_a_at | ATPase, Na+/K+ transporting, beta 1 polypeptide             | ATP1B1   | 7.69  | 6.54 | 8.84  | -2.31 | 5.6E-03 | 0.233 |
| 11719308_a_at | Ras association (RalGDS/AF-6) domain family member 4        | RASSF4   | 6.19  | 5.03 | 7.34  | -2.31 | 5.6E-03 | 0.233 |
| 11758370_s_at | v-ets avian erythroblastosis virus E26 oncogene homolog 2   | ETS2     | 5.32  | 4.17 | 6.48  | -2.31 | 3.4E-03 | 0.203 |
| 11727307_x_at | zinc finger protein 320                                     | ZNF320   | 3.59  | 2.42 | 4.76  | -2.34 | 2.2E-03 | 0.183 |

|               |                                                                                          |                 |      |      |      |       |         |       |
|---------------|------------------------------------------------------------------------------------------|-----------------|------|------|------|-------|---------|-------|
| 11759513_at   | leucine zipper and CTNNBIP1 domain containing                                            | LZIC            | 7.57 | 6.40 | 8.75 | -2.35 | 3.8E-03 | 0.212 |
| 11719922_a_at | GM2 ganglioside activator                                                                | GM2A            | 7.47 | 6.30 | 8.65 | -2.36 | 5.6E-03 | 0.233 |
| 11719367_a_at | pleckstrin homology domain containing, family O member 2                                 | PLEKHO2         | 6.75 | 5.57 | 7.93 | -2.36 | 5.2E-03 | 0.228 |
| 11734760_at   | huntingtin interacting protein 1                                                         | HIP1            | 4.84 | 3.65 | 6.02 | -2.38 | 2.1E-03 | 0.180 |
| 11725549_a_at | phosphodiesterase 4A, cAMP-specific                                                      | PDE4A           | 5.61 | 4.42 | 6.80 | -2.38 | 2.9E-03 | 0.200 |
| 11733373_at   | Janus kinase 2                                                                           | JAK2            | 5.81 | 4.61 | 7.01 | -2.39 | 8.7E-03 | 0.262 |
| 11746805_a_at | excision repair cross-complementation group 8                                            | ERCC8           | 4.11 | 2.92 | 5.31 | -2.39 | 2.6E-03 | 0.190 |
| 11738995_a_at | dihydropyrimidinase-like 2                                                               | DPYSL2          | 8.26 | 7.07 | 9.46 | -2.39 | 4.6E-03 | 0.219 |
| 11755028_a_at | DENN/MADD domain containing 1A                                                           | DENND1A         | 5.97 | 4.76 | 7.17 | -2.41 | 6.9E-03 | 0.258 |
| 11733779_a_at | dual specificity phosphatase 3                                                           | DUSP3           | 6.29 | 5.08 | 7.49 | -2.41 | 7.1E-03 | 0.258 |
| 11716678_a_at | solute carrier family 39, member 9                                                       | SLC39A9         | 4.07 | 2.87 | 5.28 | -2.41 | 3.3E-03 | 0.203 |
| 11729953_a_at | StAR-related lipid transfer (START) domain containing 5                                  | STAR5           | 6.44 | 5.23 | 7.64 | -2.42 | 7.5E-03 | 0.262 |
| 11722359_x_at | erythrocyte membrane protein band 4.1-like 2                                             | EPB41L2         | 6.67 | 5.46 | 7.89 | -2.43 | 7.0E-03 | 0.258 |
| 11732433_s_at | glycerol kinase                                                                          | GK              | 5.23 | 4.01 | 6.44 | -2.43 | 1.4E-03 | 0.158 |
| 11755251_x_at | fatty acid desaturase 1                                                                  | FADS1           | 6.30 | 5.09 | 7.52 | -2.43 | 1.8E-03 | 0.169 |
| 11750769_s_at | chemokine (C-C motif) receptor 2                                                         | CCR2            | 5.29 | 4.08 | 6.51 | -2.44 | 1.4E-03 | 0.158 |
| 11723072_x_at | NADH dehydrogenase (ubiquinone) flavoprotein 3, 10kDa                                    | NDUFV3          | 5.63 | 4.41 | 6.85 | -2.44 | 1.8E-03 | 0.169 |
| 11716186_s_at | activated leukocyte cell adhesion molecule                                               | ALCAM           | 5.39 | 4.15 | 6.62 | -2.47 | 2.1E-03 | 0.180 |
| 11756561_a_at | mediator complex subunit 20                                                              | MED20           | 6.56 | 5.32 | 7.81 | -2.50 | 3.7E-03 | 0.211 |
| 11736842_x_at | killer cell lectin-like receptor subfamily A pseudogene 1                                | KLRAP1          | 6.13 | 4.88 | 7.38 | -2.51 | 7.7E-03 | 0.262 |
| 11729368_at   | glucosidase, alpha; neutral C                                                            | GANC            | 6.06 | 4.80 | 7.32 | -2.51 | 3.2E-03 | 0.203 |
| 11759499_at   | family with sequence similarity 49, member A                                             | FAM49A          | 4.88 | 3.61 | 6.15 | -2.55 | 9.1E-03 | 0.266 |
| 11741060_a_at | hydrogen voltage-gated channel 1                                                         | HVCN1           | 5.93 | 4.66 | 7.21 | -2.55 | 2.2E-03 | 0.182 |
| 11728617_at   | caspase recruitment domain family, member 6                                              | CARD6           | 5.21 | 3.93 | 6.50 | -2.57 | 4.7E-03 | 0.219 |
| 11736122_a_at | golgi integral membrane protein 4                                                        | GOLIM4          | 7.92 | 6.63 | 9.20 | -2.57 | 2.7E-03 | 0.190 |
| 11758114_x_at | src kinase associated phosphoprotein 2                                                   | SKAP2           | 7.82 | 6.54 | 9.11 | -2.57 | 2.3E-03 | 0.185 |
| 11728839_s_at | transmembrane and coiled-coil domain family 3                                            | TMCC3           | 5.74 | 4.44 | 7.04 | -2.60 | 7.7E-03 | 0.262 |
| 11739404_at   | suppressor of variegation 4-20 homolog 1 (Drosophila)                                    | SUV420H1        | 4.12 | 2.81 | 5.43 | -2.62 | 7.1E-03 | 0.258 |
| 11729035_at   | inositol 1,4,5-trisphosphate receptor interacting protein-like 2                         | ITPRIPL2        | 6.68 | 5.35 | 8.00 | -2.65 | 6.0E-04 | 0.130 |
| 11730090_a_at | TNFSF12-TNFSF13 readthrough                                                              | TNFSF12-TNFSF13 | 7.08 | 5.75 | 8.40 | -2.66 | 1.7E-03 | 0.168 |
| 11745504_a_at | membrane protein, palmitoylated 1, 55kDa                                                 | MPP1            | 5.91 | 4.58 | 7.24 | -2.66 | 4.2E-03 | 0.214 |
| 11732266_x_at | leukocyte immunoglobulin-like receptor, subfamily B (with TM and ITIM domains), member 1 | LILRB1          | 6.72 | 5.39 | 8.05 | -2.67 | 8.9E-03 | 0.262 |
| 11726660_a_at | GPN-loop GTPase 3                                                                        | GPN3            | 5.32 | 3.98 | 6.65 | -2.67 | 2.3E-03 | 0.187 |
| 11759205_a_at | dedicator of cytokinesis 5                                                               | DOCK5           | 6.08 | 4.75 | 7.42 | -2.67 | 1.5E-03 | 0.160 |

|               |                                                                                                                  |          |      |      |       |       |         |       |
|---------------|------------------------------------------------------------------------------------------------------------------|----------|------|------|-------|-------|---------|-------|
| 11755181_a_at | transcription factor 7-like 2 (T-cell specific, HMG-box)                                                         | TCF7L2   | 5.98 | 4.64 | 7.33  | -2.69 | 1.2E-03 | 0.158 |
| 11739553_a_at | growth arrest-specific 7                                                                                         | GAS7     | 7.97 | 6.63 | 9.31  | -2.69 | 8.0E-04 | 0.141 |
| 11726628_a_at | sema domain, immunoglobulin domain (Ig), transmembrane domain (TM) and short cytoplasmic domain, (semaphorin) 4A | SEMA4A   | 6.54 | 5.19 | 7.89  | -2.70 | 3.6E-03 | 0.208 |
| 11742735_a_at | nucleolar and spindle associated protein 1                                                                       | NUSAP1   | 5.86 | 4.50 | 7.21  | -2.71 | 4.2E-03 | 0.214 |
| 11754678_a_at | solute carrier family 25, member 43                                                                              | SLC25A43 | 5.12 | 3.76 | 6.47  | -2.71 | 8.0E-04 | 0.141 |
| 11729120_x_at | heat shock 70kDa protein 1A                                                                                      | HSPA1A   | 7.84 | 6.48 | 9.20  | -2.73 | 4.6E-03 | 0.219 |
| 11727531_at   | PHD finger protein 20-like 1                                                                                     | PHF20L1  | 4.87 | 3.51 | 6.23  | -2.73 | 1.7E-03 | 0.168 |
| 11723706_at   | abhydrolase domain containing 5                                                                                  | ABHD5    | 6.11 | 4.75 | 7.48  | -2.73 | 1.5E-03 | 0.160 |
| 11726594_at   | cathepsin Z                                                                                                      | CTSZ     | 6.15 | 4.79 | 7.52  | -2.73 | 3.9E-03 | 0.214 |
| 11732307_a_at | cAMP responsive element binding protein 1                                                                        | CREB1    | 5.90 | 4.53 | 7.27  | -2.74 | 3.4E-03 | 0.203 |
| 11725418_a_at | lysophosphatidylcholine acyltransferase 2                                                                        | LPCAT2   | 8.44 | 7.07 | 9.82  | -2.75 | 7.6E-03 | 0.262 |
| 11761050_at   | Homo sapiens Gardner-Rasheed feline sarcoma viral (v-fgr) oncogene homolog (FGR), transcript variant 3, mRNA.    | FGR      | 7.05 | 5.67 | 8.43  | -2.76 | 1.5E-03 | 0.159 |
| 11725927_a_at | chloride intracellular channel 4                                                                                 | CLIC4    | 5.58 | 4.19 | 6.97  | -2.78 | 4.0E-03 | 0.214 |
| 11759373_a_at | cysteine and glycine-rich protein 1                                                                              | CSRP1    | 6.23 | 4.84 | 7.62  | -2.78 | 8.6E-03 | 0.262 |
| 11747792_a_at | solute carrier family 31 (copper transporter), member 1                                                          | SLC31A1  | 7.74 | 6.35 | 9.13  | -2.78 | 3.4E-03 | 0.203 |
| 11726294_s_at | CCAAT/enhancer binding protein (C/EBP), alpha                                                                    | CEBPA    | 6.33 | 4.93 | 7.73  | -2.80 | 6.7E-04 | 0.132 |
| 11731775_a_at | egf-like module containing, mucin-like, hormone receptor-like 1                                                  | EMR1     | 5.90 | 4.50 | 7.30  | -2.80 | 9.3E-03 | 0.267 |
| 11747086_a_at | granulysin, EF-hand calcium binding protein                                                                      | GCA      | 6.18 | 4.78 | 7.59  | -2.81 | 4.5E-03 | 0.219 |
| 11721236_a_at | lipoma HMGIC fusion partner-like 2                                                                               | LHFPL2   | 4.51 | 3.11 | 5.92  | -2.81 | 5.2E-04 | 0.125 |
| 11732542_at   | tripartite motif containing 7                                                                                    | TRIM7    | 6.98 | 5.57 | 8.40  | -2.83 | 1.3E-03 | 0.158 |
| 11731595_x_at | signal transducing adaptor molecule (SH3 domain and ITAM motif) 2                                                | STAM2    | 6.48 | 5.06 | 7.90  | -2.84 | 1.2E-03 | 0.158 |
| 11759775_a_at | solute carrier family 9, subfamily B (NHA2, cation proton antiporter 2), member 2                                | SLC9B2   | 5.81 | 4.39 | 7.23  | -2.84 | 1.4E-03 | 0.158 |
| 11752341_a_at | coagulation factor VIII, procoagulant component                                                                  | F8       | 4.40 | 2.98 | 5.82  | -2.84 | 2.5E-03 | 0.190 |
| 11755858_a_at | membrane-spanning 4-domains, subfamily A, member 1                                                               | MS4A1    | 5.19 | 3.76 | 6.61  | -2.85 | 2.1E-03 | 0.180 |
| 11737052_x_at | pleiomorphic adenoma gene-like 1                                                                                 | PLAGL1   | 4.06 | 2.64 | 5.48  | -2.85 | 8.0E-03 | 0.262 |
| 11754681_s_at | major histocompatibility complex, class II, DM beta                                                              | HLA-DMB  | 7.36 | 5.92 | 8.79  | -2.87 | 2.7E-03 | 0.190 |
| 11754989_a_at | Dmx-like 2                                                                                                       | DMXL2    | 5.04 | 3.58 | 6.51  | -2.92 | 2.6E-03 | 0.190 |
| 11720103_a_at | p21 protein (Cdc42/Rac)-activated kinase 1                                                                       | PAK1     | 6.47 | 4.99 | 7.96  | -2.97 | 2.7E-03 | 0.190 |
| 11743316_x_at | C-terminal binding protein 2                                                                                     | CTBP2    | 6.23 | 4.74 | 7.72  | -2.97 | 1.1E-03 | 0.157 |
| 11723104_at   | guanine nucleotide binding protein (G protein), beta polypeptide 4                                               | GNB4     | 4.51 | 3.02 | 5.99  | -2.98 | 8.7E-03 | 0.262 |
| 11718085_s_at | LYN proto-oncogene, Src family tyrosine kinase                                                                   | LYN      | 7.70 | 6.21 | 9.20  | -3.00 | 4.0E-03 | 0.214 |
| 11735751_a_at | solute carrier family 43, member 3                                                                               | SLC43A3  | 8.66 | 7.16 | 10.16 | -3.00 | 1.8E-03 | 0.169 |
| 11723691_at   | CD302 molecule                                                                                                   | CD302    | 7.10 | 5.60 | 8.60  | -3.00 | 4.2E-03 | 0.214 |



|               |                                                                                    |          |       |      |       |       |         |       |
|---------------|------------------------------------------------------------------------------------|----------|-------|------|-------|-------|---------|-------|
| 11741153_a_at | neutrophil cytosolic factor 2                                                      | NCF2     | 6.55  | 5.05 | 8.05  | -3.01 | 3.2E-03 | 0.203 |
| 11743900_at   | class II, major histocompatibility complex, transactivator                         | CIITA    | 5.38  | 3.88 | 6.89  | -3.01 | 2.9E-04 | 0.110 |
| 11719029_at   | phosphoinositide-3-kinase adaptor protein 1                                        | PIK3AP1  | 8.51  | 7.01 | 10.02 | -3.02 | 2.4E-03 | 0.189 |
| 11717625_a_at | transducin (beta)-like 2                                                           | TBL2     | 5.23  | 3.71 | 6.75  | -3.04 | 4.7E-04 | 0.125 |
| 11715973_a_at | mitochondrial fission regulator 1-like                                             | MTFR1L   | 5.58  | 4.06 | 7.10  | -3.04 | 3.3E-03 | 0.203 |
| 11759029_at   | BRI3 binding protein                                                               | BRI3BP   | 4.84  | 3.31 | 6.36  | -3.06 | 2.0E-03 | 0.175 |
| 11730942_s_at | osteoclast associated, immunoglobulin-like receptor                                | OSCAR    | 6.27  | 4.72 | 7.81  | -3.09 | 8.9E-03 | 0.262 |
| 11737134_x_at | zinc finger protein 385A                                                           | ZNF385A  | 7.09  | 5.55 | 8.64  | -3.09 | 9.5E-04 | 0.149 |
| 11717056_a_at | coronin, actin binding protein, 1C                                                 | CORO1C   | 6.63  | 5.08 | 8.17  | -3.09 | 5.8E-04 | 0.130 |
| 11723215_s_at | myocyte enhancer factor 2C                                                         | MEF2C    | 5.62  | 4.08 | 7.17  | -3.09 | 4.8E-04 | 0.125 |
| 11742911_at   | immunoglobulin superfamily, member 6                                               | IGSF6    | 7.43  | 5.88 | 8.97  | -3.09 | 2.3E-03 | 0.187 |
| 11754998_a_at | multiple C2 domains, transmembrane 1                                               | MCTP1    | 4.71  | 3.17 | 6.26  | -3.09 | 6.1E-04 | 0.130 |
| 11722321_at   | hematopoietically expressed homeobox                                               | HHEX     | 4.66  | 3.11 | 6.22  | -3.10 | 1.1E-03 | 0.157 |
| 11720989_a_at | solute carrier family 7 (amino acid transporter light chain, y+L system), member 7 | SLC7A7   | 5.75  | 4.19 | 7.30  | -3.11 | 7.9E-03 | 0.262 |
| 11758838_at   | serine palmitoyltransferase, long chain base subunit 2                             | SPTLC2   | 6.21  | 4.64 | 7.78  | -3.14 | 8.3E-04 | 0.144 |
| 11744484_s_at | major histocompatibility complex, class II, DR alpha                               | HLA-DRA  | 9.45  | 7.88 | 11.02 | -3.15 | 6.2E-03 | 0.245 |
| 11733955_at   | solute carrier family 22, member 15                                                | SLC22A15 | 4.25  | 2.68 | 5.83  | -3.15 | 4.0E-04 | 0.119 |
| 11750359_x_at | CD68 molecule                                                                      | CD68     | 8.11  | 6.53 | 9.68  | -3.15 | 1.2E-03 | 0.158 |
| 11743475_a_at | integrin, alpha X (complement component 3 receptor 4 subunit)                      | ITGAX    | 7.07  | 5.48 | 8.67  | -3.19 | 4.1E-03 | 0.214 |
| 11753823_a_at | S100 calcium binding protein A8                                                    | S100A8   | 10.33 | 8.73 | 11.94 | -3.21 | 8.7E-03 | 0.262 |
| 11730121_a_at | ATPase, class I, type 8B, member 4                                                 | ATP8B4   | 4.33  | 2.71 | 5.95  | -3.24 | 1.6E-03 | 0.166 |
| 11720836_a_at | Ras and Rab interactor 2                                                           | RIN2     | 5.16  | 3.53 | 6.79  | -3.26 | 8.7E-03 | 0.262 |
| 11715461_at   | lysozyme                                                                           | LYZ      | 11.13 | 9.49 | 12.76 | -3.27 | 3.4E-03 | 0.203 |
| 11725827_s_at | CD1d molecule                                                                      | CD1D     | 5.52  | 3.89 | 7.16  | -3.27 | 4.5E-03 | 0.219 |
| 11715947_a_at | potassium channel tetramerization domain containing 12                             | KCTD12   | 7.85  | 6.22 | 9.49  | -3.27 | 1.4E-03 | 0.158 |
| 11723287_at   | TYRO protein tyrosine kinase binding protein                                       | TYROBP   | 9.49  | 7.85 | 11.13 | -3.28 | 1.1E-03 | 0.157 |
| 11722970_a_at | cAMP responsive element binding protein 5                                          | CREB5    | 5.37  | 3.73 | 7.01  | -3.29 | 9.4E-04 | 0.149 |
| 11716742_a_at | tight junction protein 2                                                           | TJP2     | 5.05  | 3.40 | 6.70  | -3.30 | 2.0E-04 | 0.104 |
| 11716523_at   | S100 calcium binding protein A9                                                    | S100A9   | 9.90  | 8.24 | 11.57 | -3.34 | 5.1E-03 | 0.227 |
| 11739257_a_at | family with sequence similarity 63, member A                                       | FAM63A   | 4.71  | 3.04 | 6.38  | -3.34 | 3.8E-04 | 0.118 |
| 11763447_x_at | SubName: Full=cDNA FLJ52034;                                                       | TCRDV2   | 8.03  | 6.35 | 9.70  | -3.35 | 9.4E-04 | 0.149 |
| 11715681_s_at | cellular repressor of E1A-stimulated genes 1                                       | CREG1    | 7.71  | 6.03 | 9.39  | -3.36 | 4.9E-03 | 0.225 |
| 11720146_a_at | death-associated protein kinase 1                                                  | DAPK1    | 4.32  | 2.63 | 6.01  | -3.38 | 4.4E-03 | 0.218 |
| 11732719_at   | epiregulin                                                                         | EREG     | 4.02  | 2.33 | 5.72  | -3.39 | 5.3E-03 | 0.228 |
| 11718321_at   | CD93 molecule                                                                      | CD93     | 7.22  | 5.53 | 8.92  | -3.40 | 1.7E-03 | 0.168 |

|               |                                                                                          |          |       |      |       |       |         |       |
|---------------|------------------------------------------------------------------------------------------|----------|-------|------|-------|-------|---------|-------|
| 11721153_a_at | serine/threonine kinase 3                                                                | STK3     | 5.25  | 3.54 | 6.96  | -3.42 | 3.9E-04 | 0.118 |
| 11742301_x_at | killer cell immunoglobulin-like receptor, two domains, long cytoplasmic tail, 3          | KIR2DL3  | 5.42  | 3.71 | 7.13  | -3.42 | 2.2E-03 | 0.185 |
| 11735429_x_at | ring finger protein 135                                                                  | RNF135   | 6.92  | 5.20 | 8.63  | -3.42 | 5.8E-04 | 0.130 |
| 11727219_a_at | dermatan sulfate epimerase                                                               | DSE      | 5.91  | 4.19 | 7.62  | -3.42 | 2.7E-03 | 0.190 |
| 11729721_s_at | leukocyte immunoglobulin-like receptor, subfamily B (with TM and ITIM domains), member 3 | LILRB3   | 8.07  | 6.35 | 9.79  | -3.44 | 2.7E-03 | 0.190 |
| 11727118_a_at | complement factor properdin                                                              | CFP      | 7.55  | 5.83 | 9.28  | -3.46 | 1.4E-03 | 0.158 |
| 11719718_a_at | spleen tyrosine kinase                                                                   | SYK      | 5.39  | 3.66 | 7.12  | -3.46 | 3.3E-03 | 0.203 |
| 11725439_at   | hemoglobin, delta                                                                        | HBD      | 4.28  | 2.54 | 6.01  | -3.47 | 2.7E-03 | 0.190 |
| 11734549_s_at | transforming growth factor, beta-induced, 68kDa                                          | TGFBI    | 5.11  | 3.37 | 6.85  | -3.48 | 4.9E-03 | 0.225 |
| 11746995_a_at | N-acetylneuraminate pyruvate lyase (dihydrodipicolinate synthase)                        | NPL      | 4.79  | 3.04 | 6.54  | -3.49 | 1.3E-03 | 0.158 |
| 11723025_at   | family with sequence similarity 26, member F                                             | FAM26F   | 7.15  | 5.40 | 8.90  | -3.50 | 1.2E-03 | 0.158 |
| 11741594_a_at | leukocyte specific transcript 1                                                          | LST1     | 8.99  | 7.24 | 10.74 | -3.50 | 3.6E-04 | 0.118 |
| 11732435_at   | SLP adaptor and CSK interacting membrane protein                                         | SCIMP    | 6.25  | 4.49 | 8.02  | -3.52 | 4.8E-03 | 0.223 |
| 11745725_a_at | granulin                                                                                 | GRN      | 6.99  | 5.23 | 8.75  | -3.52 | 3.4E-04 | 0.118 |
| 11752837_x_at | egf-like module containing, mucin-like, hormone receptor-like 2                          | EMR2     | 5.91  | 4.15 | 7.68  | -3.54 | 6.2E-04 | 0.130 |
| 11724771_x_at | Fc fragment of IgG, low affinity IIa, receptor (CD32)                                    | FCGR2A   | 7.79  | 6.01 | 9.57  | -3.56 | 3.9E-03 | 0.213 |
| 11740218_a_at | signal-regulatory protein beta 1                                                         | SIRPB1   | 7.38  | 5.59 | 9.16  | -3.57 | 3.4E-03 | 0.203 |
| 11715358_x_at | cystatin C                                                                               | CST3     | 8.66  | 6.87 | 10.45 | -3.58 | 1.4E-03 | 0.158 |
| 11755606_x_at | interferon, gamma-inducible protein 30                                                   | IFI30    | 10.63 | 8.84 | 12.43 | -3.59 | 4.5E-03 | 0.219 |
| 11750527_s_at | major histocompatibility complex, class II, DQ alpha 1                                   | HLA-DQA1 | 7.71  | 5.91 | 9.50  | -3.59 | 1.4E-03 | 0.158 |
| 11737425_x_at | RAS guanyl releasing protein 4                                                           | RASGRP4  | 6.00  | 4.20 | 7.80  | -3.60 | 4.8E-04 | 0.125 |
| 11757815_s_at | methyltransferase like 7A                                                                | METTL7A  | 8.87  | 7.06 | 10.68 | -3.62 | 5.0E-03 | 0.225 |
| 11756867_a_at | tumor necrosis factor (ligand) superfamily, member 13b                                   | TNFSF13B | 7.19  | 5.33 | 9.05  | -3.72 | 3.8E-04 | 0.118 |
| 11717873_x_at | interferon regulatory factor 8                                                           | IRF8     | 6.61  | 4.73 | 8.49  | -3.76 | 7.1E-04 | 0.132 |
| 11720616_a_at | dynamin 1                                                                                | DNM1     | 5.27  | 3.39 | 7.16  | -3.77 | 9.8E-03 | 0.274 |
| 11736375_a_at | CD86 molecule                                                                            | CD86     | 5.87  | 3.98 | 7.76  | -3.78 | 7.1E-04 | 0.132 |
| 11722728_a_at | early growth response 2                                                                  | EGR2     | 5.36  | 3.47 | 7.25  | -3.78 | 3.4E-03 | 0.203 |
| 11745090_a_at | plexin domain containing 2                                                               | PLXDC2   | 6.46  | 4.56 | 8.36  | -3.80 | 1.2E-03 | 0.158 |
| 11724836_at   | neutral cholesterol ester hydrolase 1                                                    | NCEH1    | 5.20  | 3.26 | 7.14  | -3.88 | 4.1E-05 | 0.050 |
| 11737388_s_at | myotubularin related protein 11                                                          | MTMR11   | 4.57  | 2.63 | 6.52  | -3.89 | 1.3E-03 | 0.158 |
| 11718419_at   | Fc fragment of IgE, high affinity I, receptor for; gamma polypeptide                     | FCER1G   | 9.14  | 7.19 | 11.09 | -3.89 | 1.2E-03 | 0.158 |
| 11736141_a_at | intersectin 1 (SH3 domain protein)                                                       | ITSN1    | 6.34  | 4.38 | 8.30  | -3.91 | 5.2E-05 | 0.056 |
| 11738980_a_at | CD4 molecule                                                                             | CD4      | 6.44  | 4.48 | 8.41  | -3.93 | 9.0E-03 | 0.264 |
| 11726473_a_at | docking protein 3                                                                        | DOK3     | 6.64  | 4.67 | 8.61  | -3.94 | 1.8E-04 | 0.098 |
| 11722615_s_at | hydroxycarboxylic acid receptor 2                                                        | HCAR2    | 6.26  | 4.29 | 8.24  | -3.95 | 5.7E-03 | 0.234 |

|               |                                                                                          |          |      |      |       |       |         |       |
|---------------|------------------------------------------------------------------------------------------|----------|------|------|-------|-------|---------|-------|
| 11724470_s_at | microsomal glutathione S-transferase 1                                                   | MGST1    | 4.44 | 2.47 | 6.42  | -3.95 | 2.2E-03 | 0.182 |
| 11743135_s_at | CCAAT/enhancer binding protein (C/EBP), delta                                            | CEBPD    | 7.30 | 5.30 | 9.30  | -4.00 | 5.6E-03 | 0.233 |
| 11738053_x_at | plasminogen activator, urokinase receptor                                                | PLAUR    | 7.57 | 5.56 | 9.58  | -4.02 | 1.8E-03 | 0.169 |
| 11716309_a_at | cytochrome b reductase 1                                                                 | CYBRD1   | 4.89 | 2.85 | 6.92  | -4.07 | 1.2E-04 | 0.073 |
| 11733802_a_at | calcineurin-like phosphoesterase domain containing 1                                     | CPPED1   | 6.21 | 4.17 | 8.26  | -4.09 | 2.6E-04 | 0.110 |
| 11758608_s_at | colony stimulating factor 2 receptor, beta, low-affinity (granulocyte-macrophage)        | CSF2RB   | 5.14 | 3.04 | 7.24  | -4.21 | 4.9E-04 | 0.125 |
| 11729479_a_at | C-type lectin domain family 12, member A                                                 | CLEC12A  | 5.97 | 3.85 | 8.08  | -4.23 | 6.9E-04 | 0.132 |
| 11744435_a_at | dual specificity phosphatase 6                                                           | DUSP6    | 6.49 | 4.35 | 8.62  | -4.27 | 2.5E-04 | 0.110 |
| 11716049_a_at | tribbles pseudokinase 1                                                                  | TRIB1    | 8.14 | 5.99 | 10.29 | -4.30 | 2.4E-04 | 0.110 |
| 11729251_at   | myeloid cell nuclear differentiation antigen                                             | MNDA     | 7.84 | 5.68 | 10.00 | -4.33 | 5.2E-04 | 0.125 |
| 11723044_at   | SMAD family member 1                                                                     | SMAD1    | 4.74 | 2.57 | 6.90  | -4.33 | 2.5E-04 | 0.110 |
| 11741223_s_at | family with sequence similarity 198, member B                                            | FAM198B  | 4.74 | 2.56 | 6.92  | -4.35 | 4.2E-03 | 0.214 |
| 11758525_s_at | SRY (sex determining region Y)-box 4                                                     | SOX4     | 5.35 | 3.16 | 7.54  | -4.38 | 1.0E-05 | 0.019 |
| 11721456_x_at | serpin peptidase inhibitor, clade A (alpha-1 antitrypsin, antitrypsin), member 1         | SERPINA1 | 7.02 | 4.83 | 9.22  | -4.39 | 7.3E-03 | 0.258 |
| 11715347_s_at | hemoglobin, beta                                                                         | HBB      | 8.94 | 6.71 | 11.17 | -4.46 | 5.9E-03 | 0.237 |
| 11728489_a_at | C-type lectin domain family 4, member A                                                  | CLEC4A   | 6.07 | 3.82 | 8.31  | -4.49 | 6.5E-05 | 0.057 |
| 11758263_s_at | cytochrome b-245, beta polypeptide                                                       | CYBB     | 7.98 | 5.72 | 10.24 | -4.52 | 4.4E-04 | 0.124 |
| 11722426_a_at | fibrinogen-like 2                                                                        | FGL2     | 7.32 | 5.01 | 9.62  | -4.61 | 2.3E-05 | 0.032 |
| 11755743_a_at | ribonuclease, RNase A family, 2 (liver, eosinophil-derived neurotoxin) pseudogene        | ECRP     | 6.51 | 4.20 | 8.82  | -4.61 | 7.8E-04 | 0.141 |
| 11717823_s_at | tumor necrosis factor, alpha-induced protein 2                                           | TNFAIP2  | 7.76 | 5.43 | 10.10 | -4.66 | 4.9E-03 | 0.225 |
| 11743197_at   | toll-like receptor 4                                                                     | TLR4     | 6.54 | 4.17 | 8.90  | -4.72 | 8.9E-05 | 0.066 |
| 11731798_a_at | lectin, galactoside-binding, soluble, 2                                                  | LGALS2   | 7.52 | 5.15 | 9.89  | -4.74 | 2.8E-04 | 0.110 |
| 11737147_a_at | C-type lectin domain family 7, member A                                                  | CLEC7A   | 6.46 | 4.08 | 8.84  | -4.75 | 4.4E-03 | 0.219 |
| 11719634_a_at | Kruppel-like factor 4 (gut)                                                              | KLF4     | 7.64 | 5.26 | 10.02 | -4.75 | 3.5E-04 | 0.118 |
| 11746972_a_at | membrane-associated ring finger (C3HC4) 1, E3 ubiquitin protein ligase                   | MARCH1   | 5.79 | 3.41 | 8.18  | -4.77 | 7.8E-06 | 0.019 |
| 11757817_s_at | brain abundant, membrane attached signal protein 1                                       | BASP1    | 6.35 | 3.93 | 8.78  | -4.85 | 9.3E-04 | 0.149 |
| 11755688_a_at | ADAMTS-like 4                                                                            | ADAMTSL4 | 5.61 | 3.18 | 8.04  | -4.86 | 1.7E-04 | 0.097 |
| 11729758_at   | regulator of G-protein signaling 18                                                      | RGS18    | 6.25 | 3.81 | 8.70  | -4.88 | 5.1E-06 | 0.018 |
| 11728266_a_at | leukocyte immunoglobulin-like receptor, subfamily B (with TM and ITIM domains), member 2 | LILRB2   | 6.51 | 4.04 | 8.97  | -4.93 | 4.0E-03 | 0.214 |
| 11729772_at   | ribonuclease, RNase A family, 2 (liver, eosinophil-derived neurotoxin)                   | RNASE2   | 7.27 | 4.78 | 9.76  | -4.98 | 2.9E-04 | 0.110 |
| 11759403_x_at | versican                                                                                 | VCAN     | 6.00 | 3.45 | 8.55  | -5.10 | 6.3E-04 | 0.130 |
| 11750299_a_at | interleukin 13 receptor, alpha 1                                                         | IL13RA1  | 5.04 | 2.47 | 7.60  | -5.13 | 4.2E-06 | 0.018 |
| 11730469_s_at | LIM domain only 2 (rhombotin-like 1)                                                     | LMO2     | 6.92 | 4.29 | 9.56  | -5.27 | 1.1E-03 | 0.157 |

|               |                                                     |        |      |      |       |       |         |       |
|---------------|-----------------------------------------------------|--------|------|------|-------|-------|---------|-------|
| 11717762_a_at | carboxypeptidase, vitellogenic-like                 | CPVL   | 7.58 | 4.86 | 10.30 | -5.44 | 7.0E-04 | 0.132 |
| 11749817_a_at | colony stimulating factor 1 receptor                | CSF1R  | 6.51 | 3.78 | 9.24  | -5.46 | 5.5E-06 | 0.018 |
| 11755523_a_at | RNA binding motif protein 47                        | RBM47  | 5.94 | 3.21 | 8.68  | -5.47 | 1.4E-05 | 0.023 |
| 11719480_a_at | cystatin A (stefin A)                               | CSTA   | 8.38 | 5.60 | 11.15 | -5.55 | 1.8E-03 | 0.169 |
| 11716846_a_at | membrane-spanning 4-domains, subfamily A, member 6A | MS4A6A | 6.89 | 4.06 | 9.72  | -5.66 | 1.1E-04 | 0.073 |
| 11721347_a_at | macrophage expressed 1                              | MPEG1  | 6.84 | 3.86 | 9.83  | -5.97 | 1.2E-04 | 0.073 |

**Supplementary Table S4.** Gene signatures specific for naive,  $T_{CM}$ ,  $T_{EM}$ ,  $T_{EMRA}$  cells and  $CD8^+$  T-cells of HIV progressors. Custom gene sets were obtained using publically available gene expression data from (A) Willinger et al. (8) (ArrayExpress E-TABM-40) and include genes with IQR > 0.6 across all samples and which were upregulated in the respective group with FC > 1 and FDR < 0.05 compared to each of the other groups (B) Quigley et al. (9) (GEO GSE24081) and include genes with IQR > 0.5 and  $P < 0.01$  between progressors and controllers.

| A. Willinger et al. |           |           |        |         |         |           | B. Quigley et al. |           |                |           |
|---------------------|-----------|-----------|--------|---------|---------|-----------|-------------------|-----------|----------------|-----------|
| NAIVE               |           |           | TCM    | TEM     | TEMRA   |           | HIV Progressor    |           | HIV Controller |           |
| N=177               | continued | continued | N=8    | N=13    | N=104   | continued | N=119             | continued | N=94           | continued |
| ACTN1               | GSTM2     | RGMB      | ACVR2A | CA2     | ANKDD1A | MDM1      | IFI44L            | WDR70     | ADCK3          | TNFAIP3   |
| ADD3                | GTF3A     | RGS10     | AP3M2  | CCL20   | ARHGEF3 | METTL3    | IFI44             | SP110     | BTG1           | LONP2     |
| ADPRM               | HABP4     | RIN3      | CDH1   | CCR6    | BAG2    | MINPP1    | METTL7A           | VRK2      | CLK1           | TGFB1     |
| AGPAT5              | HIP1R     | RNF138    | CHN1   | CEBPD   | CASZ1   | MYL12A    | RSAD2             | STAT1     | KDM2A          | IFRD1     |
| AIF1                | HIST1H4A  | RPL31     | F2RL1  | CXCR6   | CCDC117 | NBN       | DDX60             | TRIM5     | PRDM2          | CD28      |
| AK6                 | HIST1H4E  | RSL1D1    | GPR15  | ELOVL4  | CD244   | NFYB      | XAF1              | SLC16A7   | LEPROTL1       | CXCR3     |
| AKIP1               | HIVEP1    | SAMHD1    | SESN3  | GRAMD1B | CEP78   | OSGEPL1   | OAS2              | CD38      | NENF           | ETV3      |
| AMIGO1              | HOOK1     | SATB1     | TIAM1  | KIT     | CTBP2   | P2RX7     | CX3CR1            | UNG       | TAPT1          | HLA-DQB1  |
| APBA2               | HOOK2     | SCML1     |        | MCAM    | CUL4A   | PALLD     | CTBP1             | STOM      | TMOD1          | LRIG1     |
| ARHGEF7             | HPCAL4    | SELL      |        | ME1     | CX3CR1  | PCID2     | SLAMF7            | KIDINS220 | RPLP0          | GADD45A   |
| ARRDC2              | HSF2      | SERINC5   |        | SIPA1L2 | DGKD    | PKD2      | MNDA              | ASUN      | TSN            | SYNJ2     |
| ATHL1               | IGF1R     | SF1       |        | SPRY1   | DOCK5   | PROK2     | M6PR              | MFSD9     | ILKAP          | RASA1     |
| ATM                 | IL23A     | SGK223    |        | ZBTB16  | DPYSL2  | PRSS23    | KLRAP1            | RBL1      | SPSB3          | PRKCI     |
| ATP5L               | IL6ST     | SGTB      |        |         | EMC2    | PSTPIP2   | TARP              | TNFRSF9   | ZNF136         | NR4A2     |
| ATP8A2              | ITGA6     | SHISA2    |        |         | EXOC4   | PTCH1     | AKAP2             | TAF1B     | IP6K1          | KLHL11    |
| BACH2               | JAK3      | SLC18B1   |        |         | FAM122B | PTGDS     | ATP2B4            | METTL2A   | APBA2          | MVB12B    |
| BEX2                | KCTD12    | SLC36A4   |        |         | FAM126A | PTPN12    | AIM2              | MPHOSPH9  | C16orf72       | ZBTB10    |
| BNIP3               | KIAA1147  | SLC44A2   |        |         | FAM204A | PTPN4     | GBP1              | XPO7      | SESN1          | JMJD6     |
| BTBD11              | KIAA1958  | SNN       |        |         | FAM49A  | RAB29     | PRSS23            | VPS8      | MED14          | PIK3IP1   |
| C12orf65            | KIF2A     | SPG20     |        |         | FAM63B  | RHEBL1    | IFI35             | CHM       | CCNH           | ELL2      |
| C1orf228            | KLF7      | SPINT2    |        |         | FAM69A  | RNF135    | OAS1              | PRPS2     | DNAJC2         | IL7R      |
| C4orf32             | LEF1      | SPPL2B    |        |         | FCGR3A  | SAMD3     | JAK2              | FDFT1     | CEBPG          | SLC39A8   |

|         |          |           |          |         |         |          |           |          |
|---------|----------|-----------|----------|---------|---------|----------|-----------|----------|
| CBX5    | LGALS3BP | TATDN1    | FGL2     | SEC23IP | STX7    | ADAM10   | GABARAPL1 | PHLDA1   |
| CCDC57  | LIAS     | TBC1D4    | FNIP2    | SLC15A4 | SAC3D1  | CCNA2    | ATHL1     | ABCG1    |
| CCND3   | LMF1     | TCEA3     | GBP3     | SLFN13  | NDC80   | DCAF11   | CD44      | PTGER4   |
| CCS     | LMO7     | TCP11L2   | GNPTAB   | SPIN4   | PLSCR1  | SCP2     | SDHB      | SPOCK2   |
| CD248   | LRRN3    | TECPR1    | GOLIM4   | SRPK2   | MX1     | SUPT4H1  | PCIF1     | PDE4B    |
| CDK5R1  | LTB      | TESPA1    | GSAP     | SSBP3   | IFI6    | ITGB7    | CCT6B     | LMNA     |
| CEP68   | LY96     | TIMP2     | HDAC8    | STK39   | ZNF224  | CCT3     | ZDHHC7    | SLC7A5   |
| CEP85L  | LYRM4    | TMC8      | HENMT1   | STX8    | DEDD    | MAB21L2  | WWP2      | NELL2    |
| CHKA    | LZTS3    | TMEM123   | HMG3     | TBK1    | FANCL   | CENPU    | ACVR1B    | TNFRSF25 |
| CHMP3   | MAL      | TMEM204   | HSPB11   | TEP1    | TPP1    | MAVS     | TOR1AIP2  | CYP1B1   |
| CLMP    | MAN1C1   | TMEM256   | IDH1     | TGFBR1  | RDH11   | TMEM140  | BIRC3     | MAFF     |
| CLN5    | MAST4    | TMEM63A   | IGF2R    | TMEM14A | TPGS2   | MAGEH1   | SYPL1     | PLXDC1   |
| CLNS1A  | MATR3    | TMSB15B   | ITGAM    | TMEM64  | GZMH    | PCMT1    | ISCA1     | HLA-DQA1 |
| DCHS1   | MICU3    | TNFRSF10D | JAZF1    | TTC38   | CHI3L2  | OSGEPL1  | KLF9      |          |
| DEAF1   | MRPS33   | TPP2      | KIR2DL1  | TTC39B  | EIF2AK2 | ARIH2    | ITGA5     |          |
| DENND5A | MTUS1    | TRABD2A   | KIR2DL2  | TYROBP  | BST2    | CLCN3    | FAM102A   |          |
| DGKA    | MYC      | TSPAN3    | KIR2DL3  | UBE2F   | DHFR    | RAB11A   | TNF       |          |
| DHRS3   | NDFIP1   | TSPAN32   | KIR2DL4  | USP28   | LYST    | KEAP1    | TGIF1     |          |
| DPEP2   | NDUFB5   | TTN       | KIR2DL5A | VRK2    | USP18   | RAB27A   | SMAD7     |          |
| DPH5    | NELL2    | TXK       | KIR2DS1  | YME1L1  | CD244   | KIAA0101 | EMG1      |          |
| DSC1    | NGFRAP1  | VIPR1     | KIR2DS2  | ZBP1    | GPD2    | RAB3GAP2 | RBPJ      |          |
| EFNA1   | NUCB2    | VPS13B    | KIR2DS3  | ZEB2    | IRF9    | SPIN2A   | FGF9      |          |
| ERCC6L2 | OMA1     | VPS8      | KIR2DS4  | ZNF600  | RBM8A   | C6orf47  | PDCD4     |          |
| FAM134B | OXNAD1   | VSIG1     | KIR2DS5  |         | PLEK    | NCAPG    | FBXO42    |          |
| FAM229B | PCSK5    | YPEL2     | KIR3DL1  |         | PRF1    | INTS9    | ZNF395    |          |
| FAM65B  | PDK1     | ZBTB20    | KIR3DL2  |         | CASP4   | NF1      | PLXND1    |          |
| FCMR    | PECAM1   | ZBTB4     | KIR3DL3  |         | TMX1    | ACTR3    | CD6       |          |
| FHIT    | PIGP     | ZEB1      | KIR3DS1  |         | MAN1A1  | OAZ3     | CCR7      |          |
| FIS1    | PIK3CD   | ZFP90     | KLRC3    |         | HSPA6   | IFI16    | SPATA2    |          |
| FKBP5   | PLAC8    | ZNF10     | KLRD1    |         | PPP2R2B | ADGRG1   | ZBTB18    |          |
| FYB     | PRKCA    | ZNF141    | KLRF1    |         | CASP7   | MSH2     | FKBP11    |          |

|         |         |         |        |          |         |       |
|---------|---------|---------|--------|----------|---------|-------|
| GIMAP6  | PRMT2   | ZNF274  | LILRB1 | ARL6IP5  | MANEA   | HSPH1 |
| GIMAP8  | RAB33A  | ZNF302  | LUC7L3 | DERA     | IVD     | RGPD5 |
| GNAQ    | RALGPS2 | ZNF496  | LYN    | CAPN3    | NCKAP1L | ETS2  |
| GOLGA8A | RAPGEF6 | ZNF542P | LYPLA1 | FEZ2     | CAPZB   | TAF9B |
| GPRASP1 | RBM11   | ZNF677  | MAPK1  | SCD      | HEMK1   | RGS1  |
| GSTM1   | RCAN3   | ZSCAN18 | MCTP2  | FAS      | TTC38   | AREG  |
|         |         |         |        | TRAF3IP3 |         |       |

**Supplementary Table S5.** *Ingenuity Pathway Analysis of differentially expressed genes in pre-treatment AML patients relative to healthy controls.* z-score values indicate activation (positive z-score) or inhibition (negative z-score) of the canonical pathways.

| Ingenuity Canonical Pathways                      | -log(p-value) | Ratio    | z-score | Molecules                                                                                                                                                                                                 |
|---------------------------------------------------|---------------|----------|---------|-----------------------------------------------------------------------------------------------------------------------------------------------------------------------------------------------------------|
| Apoptosis Signaling                               | 1.55E00       | 1.82E-01 | 0.500   | MAPK8,APAF1,MAP3K5,NFKB1,XIAP,BCL2,IKBKB,PLCG2,DFFB,CAPN2,RPS6KA1,TNF,BIRC3,BCL2L11,FASLG,PRKCA                                                                                                           |
| OX40 Signaling Pathway                            | 4.17E00       | 3.26E-01 | -1.633  | TRAF3,HLA-DOA,HLA-DQA1,MAPK8,HLA-DQB1,NFKB1,CD3D,BCL2,HLA-DRB1,HLA-DRB4,HLA-C,FCER1G,HLA-DPB1,HLA-DRB5,HLA-DPA1                                                                                           |
| PKC $\theta$ Signaling in T Lymphocytes           | 2.9E00        | 2.13E-01 | -0.577  | RAC2,HLA-DOA,PIK3CA,MAP3K13,PIK3R1,MAP3K1,HLA-DQA1,MAPK8,MAP3K5,HLA-DQB1,NFKB1,CD3D,NFATC1,PIK3R3,IKBKB,MAP3K12,CD28,HLA-DRB1,VAV3,PLCG2,FCER1G,MAP3K8,HLA-DRB5                                           |
| Role of NFAT in Regulation of the Immune Response | 2.7E00        | 1.89E-01 | -0.426  | HLA-DOA,PIK3CA,CAMK4,PIK3R1,HLA-DQA1,HLA-DQB1,NFKB1,FCGR2B,NFATC1,GNG7,IKBKB,CD28,HLA-DRB1,PLCB1,XPO1,FCGR3A/FCGR3B,FCGR2A,GNA12,GNAQ,CD79A,ITPR1,CD3D,PIK3R3,PLCG2,FCER1G,LYN,RCAN3,MEF2C,RCAN2,HLA-DRB5 |
| iCOS-iCOSL Signaling                              | 2.01E00       | 2.04E-01 | -2.236  | GAB2,HLA-DOA,PIK3CA,CD40LG,IL2RG,CAMK4,PIK3R1,HLA-DQA1,ITPR1,HLA-DQB1,NFKB1,CD3D,NFATC1,PIK3R3,IKBKB,CD28,HLA-DRB1,ICOS,FCER1G,HLA-DRB5                                                                   |
| Calcium-induced T Lymphocyte Apoptosis            | 1.98E00       | 2.26E-01 | 0.816   | HLA-DOA,CAMK4,HLA-DRB1,PRKCD,HLA-DQA1,FCER1G,CAPN2,HLA-DQB1,ITPR1,CD3D,HLA-DRB5,PRKCA                                                                                                                     |
| CD28 Signaling                                    | 1.76E+00      | 2.13E-01 | -1.732  | HLA-DOA,PTPN6,PIK3CA,CAMK4,PIK3R1,ARPC5,MAP3K1,HLA-DQA1,MAPK8,ITPR1,HLA-DQB1,NFKB1,CTLA4,CD3D,NFATC1,PIK3R3,IKBKB,CD28,HLA-DRB1,PTPN11,CDC42,FCER1G,HLA-DRB5                                              |
| Interferon Signaling                              | 1.87E00       | 2.5E-01  | 1.414   | IFNG,OAS1,IFNGR2,IFI35,IRF9,STAT1,IFITM2,BCL2,ISG15                                                                                                                                                       |



**Supplementary Table S6.** *Ingenuity Pathway Analysis of differentially expressed genes in CR relative to NR AML patients post induction chemotherapy.* z-score values indicate activation (positive z-score) or inhibition (negative z-score) of the canonical pathways.

| Ingenuity Canonical Pathways                      | -log(p-value) | Ratio    | z-score | Molecules                                                                                                                                                                                                                                                    |
|---------------------------------------------------|---------------|----------|---------|--------------------------------------------------------------------------------------------------------------------------------------------------------------------------------------------------------------------------------------------------------------|
| Chemokine Signaling                               | 1.36E00       | 1.79E-01 | 1.732   | GNAI3,RAF1,CCR5,CAMK4,CAMK2D,PPP1R12B,CCL2,PLCG2,MRAS,GNAQ,LI<br>MK2,PRKCA                                                                                                                                                                                   |
| Role of NFAT in Regulation of the Immune Response | 5.64E+00      | 2.33E-01 | -2.414  | BLNK,RAF1,FCGR2C,PIK3CA,HLA-DOA,CAMK4,CD4,FCER1A,HLA-<br>DQA1,FCGR2B,FCGR1A,NFATC1,CD28,GNB4,HLA-DRB1,GNA15,HLA-<br>DMA,HLA-DMB,HLA-<br>DRA,MRAS,PIK3R2,FCGR1B,FCGR3A/FCGR3B,AKT2,FCGR2A,CHP1,GNAQ,G<br>NG10,BTK,GNAI3,SYK,PLCG2,FCER1G,LYN,CD86,MEF2C,RCAN2 |
| OX40 Signaling Pathway                            | 3.19E00       | 2.83E-01 | 0.500   | TNFSF4,HLA-DOA,HLA-DRB4,HLA-DRB1,HLA-C,HLA-DMA,CD4,HLA-DRA,HLA-<br>DMB,HLA-DQA1,FCER1G,HLA-DPB1,HLA-DPA1                                                                                                                                                     |
| NF-κB Signaling                                   | 3.09E00       | 1.89E-01 | -1.257  | RAF1,PIK3CA,CSNK2A1,TLR8,BMPR2,TLR10,TNIP1,TLR1,IGF1R,MRAS,PIK3R<br>2,LTBR,TNFSF13B,AKT2,MYD88,FGFR1,IRAK3,TNFRSF11A,DDR1,TLR2,TLR4,<br>IL18,ARAF,IL1RN,PLCG2,PELI1,TLR6,FCER1G,IL1B,INSR,EIF2AK2                                                            |
| Calcium-induced T Lymphocyte Apoptosis            | 2.58E00       | 2.45E-01 | -0.816  | HLA-DOA,HLA-DRB1,CAMK4,HLA-DMA,PRKCD,CD4,HLA-DMB,HLA-<br>DRA,CHP1,FCER1G,NR4A1,HLA-DQA1,PRKCA                                                                                                                                                                |
| PI3K Signaling                                    | 2.38E00       | 1.87E-01 | -2.132  | VAV2,BLNK,RAF1,AKT2,PIK3CA,ATF3,CAMK4,CHP1,FCGR2B,NFATC1,BTK,TL<br>R4,CAMK2D,DAPP1,SYK,PLCG2,VAV3,CREB1,MRAS,LYN,PIK3AP1,PIK3R2,<br>CR2                                                                                                                      |
| iCOS-iCOSL Signaling                              | 1.9E00        | 1.84E-01 | 0.905   | PIK3CA,AKT2,HLA-DOA,CAMK4,CD4,CHP1,HLA-DQA1,NFATC1,CD28,HLA-<br>DRB1,CAMK2D,HLA-DMA,ICOS,HLA-DRA,HLA-DMB,FCER1G,IL2RA,PIK3R2                                                                                                                                 |
| PKCθ Signaling in T Lymphocytes                   | 1.68E00       | 1.85E-01 | -2,828  | VAV2,PIK3CA,HLA-DOA,CD4,MAP3K13,CHP1,HLA-DQA1,NFATC1,CD28,HLA-<br>DRB1,CAMK2D,HLA-DMA,VAV3,PLCG2,HLA-DRA,HLA-<br>DMB,MRAS,FCER1G,CD86,PIK3R2                                                                                                                 |

**Supplementary Table S7. Characteristics of AML patients.**

|                                           |                               | N*         | (%)* |
|-------------------------------------------|-------------------------------|------------|------|
| <b>Patients included</b>                  |                               | 72         | 100  |
| <b>Age</b>                                | Years, Median (range)         | 57 (21-76) |      |
|                                           | < 60 yrs                      | 34         | 47.2 |
|                                           | ≥ 60 yrs                      | 38         | 52.8 |
| <b>Sex</b>                                | Females                       | 38         | 52.8 |
|                                           | Males                         | 34         | 47.2 |
| <b>AML</b>                                | Primary (de novo)             | 60         | 83.3 |
|                                           | Secondary (MDS related)       | 9          | 12.5 |
|                                           | Secondary (treatment related) | 3          | 4.2  |
| <b>Prognostic Group (ELN)</b>             | Favorable                     | 18         | 25   |
|                                           | Intermediate I                | 23         | 32   |
|                                           | Intermediate II               | 15         | 20.8 |
|                                           | Adverse                       | 16         | 22.2 |
| <b>Cytogenetics</b>                       | Favorable                     | 6          | 18.1 |
|                                           | Intermediate                  | 53         | 73.6 |
|                                           | Adverse                       | 13         | 8.3  |
| <b>Molecular features</b>                 | NPM1 mutation                 | 20         | 27.8 |
|                                           | FLT3 mutation                 | 12         | 16.7 |
|                                           | CEBPA mutation                | 6          | 8.3  |
| <b>White Blood Count</b>                  | < 30 000/mm <sup>3</sup>      | 52         | 72.2 |
|                                           | ≥ 30 000/mm <sup>3</sup>      | 20         | 27.8 |
| <b>Induction Regimen*</b>                 | high intensity                | 37         | 51.4 |
|                                           | intermediate intensity        | 19         | 40.3 |
|                                           | low intensity                 | 6          | 8.3  |
| <b>Response to Induction Chemotherapy</b> | Complete Remission (CR)       | 56         | 77.8 |
|                                           | Non Responders (NR)           | 16         | 22.2 |
| <b>CMV status</b>                         | Positive                      | 23         | 32   |
|                                           | Negative                      | 38         | 52.8 |
|                                           | N/A                           | 11         | 15.2 |

AML - acute myeloid leukemia; ELN – European LeukemiaNet (10); N/A – not available.

\*Induction regimen - high intensity (containing cytarabine at a daily dose >500 mg/m<sup>2</sup> plus anthracycline); intermediate intensity (containing cytarabine at a daily dose ≤500 mg/m<sup>2</sup> plus anthracycline such as standard regimen “7+3”); low intensity (hypomethylating agents or clofarabine) (11). Detailed clinical information for each patient is provided in Supplementary Ttable S8.

**Supplementary Table S8. Detailed clinical characteristics of AML patients.** Diagnosis: \*arising from myelodysplastic syndrome, \*\* therapy related. n.a – not available. Induction regimen - high intensity (containing cytarabine at a daily dose > 500 mg/m<sup>2</sup> plus anthracycline); intermediate intensity (containing cytarabine at a daily dose ≤ 500 mg/m<sup>2</sup> plus anthracycline such as standard regimen “7+3”); others including hypomethylating agents or clofarabine (11). CR: complete remission; CRi: complete remission with incomplete hematologic recovery; NR: non responder to induction chemotherapy. FLT3 represents ITD mutation unless otherwise indicated. ELN – European LeukemiaNet (10). MRC - Medical Research Council (12).

| Patient ID | Sex | Age | Diagnosis       | CMV status | Induction regimen intensity categorized* | Response to induction chemo | MRD at remission | ELN Risk group | Cytogenetics risk group (MRC) | NPM1, FLT3 or CEBPa mutated | Total WBC at diagnosis/ $\mu$ l | In vitro studies | Initial cohort - FC | Microarray studies | Extended, paired pre-/post-treatment-FC |
|------------|-----|-----|-----------------|------------|------------------------------------------|-----------------------------|------------------|----------------|-------------------------------|-----------------------------|---------------------------------|------------------|---------------------|--------------------|-----------------------------------------|
| 1          | F   | 51  | de novo AML     | neg        | high                                     | CR                          | no               | adverse        | intermediate                  | none                        | 4140                            | YES              | YES                 |                    |                                         |
| 2          | M   | 63  | secondary AML*  | neg        | high                                     | CRi                         | no               | intermediate 1 | intermediate                  | none                        | 124140                          | YES              | YES                 |                    |                                         |
| 3          | M   | 65  | de novo AML     | neg        | intermediate                             | CR                          | no               | favorable      | intermediate                  | NPM1                        | 30970                           | YES              | YES                 |                    |                                         |
| 4          | F   | 65  | de novo AML     | pos        | intermediate                             | CR                          | no               | intermediate 1 | intermediate                  | none                        | 5250                            | YES              | YES                 |                    |                                         |
| 5          | M   | 55  | de novo AML     | n.a.       | high                                     | CR                          | no               | favorable      | intermediate                  | NPM1                        | 43200                           | YES              | YES                 |                    |                                         |
| 6          | M   | 44  | de novo AML     | n.a.       | high                                     | CR                          | no               | favorable      | intermediate                  | FLT3-TKD                    | 50600                           | YES              | YES                 |                    |                                         |
| 7          | F   | 76  | de novo AML     | n.a.       | intermediate                             | CR                          | no               | favorable      | favorable                     | NPM1, CEBPa                 | 230000                          | YES              | YES                 |                    |                                         |
| 8          | M   | 73  | secondary AML * | neg        | others                                   | CR                          | no               | adverse        | intermediate                  | none                        | 980                             | YES              | YES                 |                    |                                         |
| 9          | F   | 45  | de novo AML     | pos        | high                                     | CR                          | no               | intermediate 1 | intermediate                  | NPM1, FLT3                  | 13700                           | YES              | YES                 |                    |                                         |
| 10         | F   | 52  | de novo AML     | neg        | high                                     | CR                          | YES              | favorable      | intermediate                  | FLT3                        | 24660                           | YES              | YES                 |                    |                                         |
| 11         | F   | 54  | de novo AML     | neg        | high                                     | CR                          | no               | intermediate 1 | intermediate                  | none                        | 5620                            | YES              | YES                 |                    | YES                                     |
| 12         | F   | 38  | de novo AML     | pos        | high                                     | CR                          | YES              | adverse        | adverse                       | none                        | 24000                           | YES              | YES                 |                    | YES                                     |
| 13         | M   | 44  | de novo AML     | neg        | intermediate                             | CR                          | no               | favorable      | favorable                     | none                        | 3380                            | YES              | YES                 |                    | YES                                     |
| 14         | F   | 31  | de novo AML     | pos        | high                                     | CR                          | no               | favorable      | favorable                     | none                        | 3810                            | YES              | YES                 |                    | YES                                     |
| 15         | F   | 57  | de novo AML     | neg        | high                                     | CR                          | no               | adverse        | adverse                       | none                        | 30210                           | YES              | YES                 |                    | YES                                     |
| 16         | M   | 63  | secondary AML*  | neg        | high                                     | CRi                         | YES              | adverse        | adverse                       | none                        | 3860                            | YES              | YES                 |                    | YES                                     |
| 17         | M   | 61  | de novo AML     | neg        | high                                     | CR                          | no               | intermediate 1 | intermediate                  | NPM1, FLT3                  | 82220                           | YES              | YES                 |                    | YES                                     |
| 18         | F   | 29  | de novo AML     | pos        | high                                     | CR                          | no               | intermediate 1 | intermediate                  | none                        | 11317                           | YES              | YES                 |                    | YES                                     |
| 19         | M   | 63  | de novo AML     | neg        | high                                     | CR                          | no               | intermediate 2 | intermediate                  | CEBPa                       | 204770                          | YES              | YES                 | YES                | YES                                     |

|    |   |    |                 |      |              |     |     |                |              |            |        |     |     |     |     |
|----|---|----|-----------------|------|--------------|-----|-----|----------------|--------------|------------|--------|-----|-----|-----|-----|
| 20 | F | 68 | secondary AML*  | neg  | intermediate | CR  | no  | adverse        | adverse      | none       | 40000  | YES | YES | YES | YES |
| 21 | F | 63 | de novo AML     | neg  | high         | CR  | no  | intermediate 2 | intermediate | none       | 1180   |     |     | YES |     |
| 22 | M | 60 | de novo AML     | neg  | high         | CR  | YES | intermediate 1 | intermediate | CEBPa      | 3500   |     |     | YES |     |
| 23 | F | 45 | de novo AML     | pos  | high         | CR  | no  | intermediate 1 | intermediate | NPM1, FLT3 | 13700  |     |     | YES |     |
| 24 | F | 60 | de novo AML     | pos  | intermediate | NR  | no  | adverse        | intermediate | none       | 11900  |     |     | YES | YES |
| 25 | M | 56 | de novo AML     | neg  | high         | CR  | no  | favorable      | intermediate | NPM1       | 20840  |     |     | YES | YES |
| 26 | M | 69 | de novo AML     | pos  | intermediate | NR  | no  | intermediate 2 | intermediate | none       | 15510  |     |     | YES | YES |
| 27 | M | 61 | de novo AML     | pos  | high         | NR  | no  | intermediate 2 | intermediate | FLT3       | 65000  |     |     | YES | YES |
| 28 | F | 56 | de novo AML     | neg  | high         | CR  | no  | intermediate 1 | intermediate | NPM1, FLT3 | 13600  |     |     |     | YES |
| 29 | F | 71 | secondary AML*  | n.a. | intermediate | CRi | YES | intermediate 1 | intermediate | NPM1, FLT3 | 55000  |     |     |     | YES |
| 30 | F | 65 | de novo AML     | neg  | others       | CR  | YES | favorable      | intermediate | FLT3       | 18550  |     |     |     | YES |
| 31 | M | 60 | secondary AML*  | pos  | intermediate | NR  | no  | intermediate 1 | intermediate | none       | 1240   |     |     |     | YES |
| 32 | M | 23 | de novo AML     | pos  | intermediate | NR  | no  | adverse        | adverse      | none       | 57780  |     |     |     | YES |
| 33 | M | 35 | de novo AML     | n.a. | intermediate | CR  | no  | favorable      | favorable    | none       | 3850   |     |     |     | YES |
| 34 | M | 67 | de novo AML     | neg  | others       | CR  | no  | adverse        | adverse      | none       | 2520   |     |     |     | YES |
| 35 | F | 49 | de novo AML     | neg  | high         | CR  | no  | favorable      | intermediate | NPM1       | 3760   |     |     |     | YES |
| 36 | M | 38 | de novo AML     | neg  | high         | CR  | no  | intermediate 2 | intermediate | none       | 24000  |     |     |     | YES |
| 37 | F | 53 | de novo AML     | n.a. | high         | NR  | no  | intermediate 1 | intermediate | NPM1, FLT3 | 54670  |     |     |     | YES |
| 38 | F | 56 | secondary AML** | pos  | high         | NR  | no  | adverse        | adverse      | none       | 3600   |     |     |     | YES |
| 39 | M | 75 | de novo AML     | n.a. | intermediate | NR  | no  | intermediate 1 | intermediate | CEBPa      | 34330  |     |     |     | YES |
| 40 | M | 69 | secondary AML** | neg  | intermediate | CR  | no  | intermediate 1 | intermediate | none       | 16460  |     |     |     | YES |
| 41 | M | 39 | de novo AML     | neg  | high         | CR  | no  | favorable      | intermediate | NPM1       | 1240   |     |     |     | YES |
| 42 | M | 75 | de novo AML     | n.a. | intermediate | CR  | no  | intermediate 2 | intermediate | none       | 15510  |     |     |     | YES |
| 43 | M | 52 | de novo AML     | neg  | high         | CR  | no  | favorable      | favorable    | none       | 255950 |     |     |     | YES |
| 44 | F | 66 | de novo AML     | pos  | intermediate | NR  | no  | intermediate 2 | intermediate | none       | 3120   |     |     |     | YES |
| 45 | F | 36 | de novo AML     | n.a. | high         | CR  | no  | intermediate 2 | intermediate | none       | 2610   |     |     |     | YES |
| 46 | M | 62 | de novo AML     | neg  | high         | CR  | no  | intermediate 1 | intermediate | none       | 420    |     |     |     | YES |
| 47 | F | 50 | de novo AML     | neg  | high         | NR  | no  | adverse        | adverse      | none       | 1450   |     |     |     | YES |
| 48 | F | 65 | de novo AML     | pos  | intermediate | CRi | YES | favorable      | intermediate | FLT3       | 83710  |     |     |     | YES |
| 49 | F | 66 | de novo AML     | pos  | high         | CRi | YES | intermediate 2 | intermediate | none       | 27370  |     |     |     | YES |
| 50 | F | 66 | de novo AML     | neg  | others       | CR  | no  | intermediate 2 | intermediate | none       | 1780   |     |     |     | YES |

|    |   |    |                 |      |              |    |     |                |              |            |        |     |
|----|---|----|-----------------|------|--------------|----|-----|----------------|--------------|------------|--------|-----|
| 51 | F | 73 | secondary AML*  | pos  | intermediate | CR | no  | intermediate 1 | intermediate | none       | 3410   | YES |
| 52 | M | 57 | de novo AML     | n.a. | intermediate | CR | no  | favorable      | favorable    | none       | 13600  | YES |
| 53 | M | 52 | de novo AML     | neg  | high         | CR | no  | intermediate 2 | intermediate | CEBPa      | 1490   | YES |
| 54 | F | 65 | secondary AML** | pos  | high         | CR | no  | adverse        | adverse      | none       | 830    | YES |
| 55 | M | 29 | de novo AML     | neg  | intermediate | NR | no  | intermediate 1 | intermediate | none       | 2930   | YES |
| 56 | F | 65 | secondary AML*  | neg  | intermediate | CR | no  | intermediate 2 | intermediate | none       | 3260   | YES |
| 57 | F | 68 | de novo AML     | pos  | intermediate | CR | no  | intermediate 1 | intermediate | NPM1, FLT3 | 178400 | YES |
| 58 | M | 76 | de novo AML     | neg  | intermediate | CR | YES | favorable      | intermediate | NPM1       | 1290   | YES |
| 59 | F | 60 | de novo AML     | pos  | high         | CR | no  | intermediate 1 | intermediate | NPM1, FLT3 | 29690  | YES |
| 60 | F | 57 | de novo AML     | neg  | intermediate | CR | no  | intermediate 2 | intermediate | FLT3       | 3370   | YES |
| 61 | M | 60 | de novo AML     | neg  | high         | CR | no  | adverse        | adverse      | none       | 1360   | YES |
| 62 | M | 74 | de novo AML     | pos  | intermediate | NR | no  | adverse        | adverse      | none       | 57670  | YES |
| 63 | F | 69 | de novo AML     | pos  | others       | NR | no  | intermediate 1 | intermediate | none       | 7430   | YES |
| 64 | M | 37 | de novo AML     | neg  | high         | NR | no  | intermediate 1 | intermediate | none       | 1220   | YES |
| 65 | F | 75 | de novo AML     | neg  | others       | CR | no  | adverse        | adverse      | none       | 5530   | YES |
| 66 | M | 21 | de novo AML     | n.a. | intermediate | CR | no  | intermediate 1 | intermediate | none       | 3230   | YES |
| 67 | M | 47 | de novo AML     | neg  | high         | CR | no  | intermediate 1 | intermediate | NPM1, FLT3 | 6620   | YES |
| 68 | F | 67 | de novo AML     | neg  | intermediate | CR | no  | favorable      | intermediate | CEBPa      | 3780   | YES |
| 69 | F | 55 | de novo AML     | pos  | intermediate | CR | no  | favorable      | intermediate | NPM1       | 35510  | YES |
| 70 | F | 43 | de novo AML     | neg  | intermediate | CR | YES | intermediate 2 | intermediate | none       | 1580   | YES |
| 71 | F | 48 | secondary AML*  | neg  | high         | NR | no  | intermediate 2 | intermediate | none       | 28110  | YES |
| 72 | M | 72 | de novo AML     | pos  | intermediate | NR | no  | adverse        | adverse      | none       | 13530  | YES |

**Supplementary Table S9. Statistical comparison of CD8<sup>+</sup> T-cell differentiation subsets in PB and BM, before and after treatment.**

Presented are pre-treatment, post-treatment, and over time analyses according to response to therapy for 59 paired patient samples, and HC samples (PB, *n* = 56; BM, *n* = 24). *P* values for differences between HC and AML patients from linear regression models using logarithmically transformed numbers and adjusted for age. *P* values for differences between patient groups over time from mixed effects linear regression models using logarithmically transformed numbers, adjusted for age and including a random intercept for each patient. For more intuitive comprehension by the reader, values are presented as raw mean percentages ( $\pm$ SD).

| Subset             | Controls    | AML pre-treatment |                      |             |             |                | AML post induction chemotherapy |             |             |                |                          | Over time analyses |                    |  |
|--------------------|-------------|-------------------|----------------------|-------------|-------------|----------------|---------------------------------|-------------|-------------|----------------|--------------------------|--------------------|--------------------|--|
|                    |             | Pre (all)         | Contr. vs. Pre (all) | CR          | NR          | CR vs. NR      | Post (all)                      | CR          | NR          | CR vs. NR      | Post (all) vs. Pre (all) | CR Post vs. CR Pre | NR Post vs. NR Pre |  |
| Peripheral Blood   | Mean (SD)   | Mean (SD)         | <i>P</i> value       | Mean (SD)   | Mean (SD)   | <i>P</i> value | Mean (SD)                       | Mean (SD)   | Mean (SD)   | <i>P</i> value | <i>P</i> value           | <i>P</i> value     | <i>P</i> value     |  |
| CD8+ Naive         | 47 (23.5)   | 28.8 (21.8)       | <b>0.0007</b>        | 28.4 (21.4) | 29.9 (23.7) | ns             | 30.5 (21.8)                     | 33.6 (21.7) | 22.5 (20.8) | ns             | ↔ ns                     | ↔ ns               | ↔ ns               |  |
| CD8+ CM            | 5.7 (5.8)   | 6.8 (4.7)         | <b>0.03</b>          | 7.1 (4.8)   | 6 (4.5)     | ns             | 7.8 (6.5)                       | 7.7 (6.8)   | 8.2 (6)     | ns             | ↔ ns                     | ↔ ns               | ↔ ns               |  |
| CD8+ EM            | 25 (15.6)   | 33.3 (17.3)       | <b>0.03</b>          | 34.9 (17.6) | 28.9 (16.3) | ns             | 34.7 (17.8)                     | 36 (18.4)   | 31.3 (16.5) | ns             | ↔ ns                     | ↔ ns               | ↔ ns               |  |
| CD8+ TEMRA         | 22.3 (13.8) | 31 (17.1)         | <b>0.01</b>          | 29.5 (15.9) | 35.2 (20.3) | ns             | 27 (17)                         | 22.7 (13.7) | 38 (20.3)   | <b>0.06</b>    | ↓ <b>0.03</b>            | ↓ <b>0.008</b>     | ↔ ns               |  |
| CD8+ Naive like    | 62.7 (18.6) | 39.1 (21.6)       | <b>&lt;0.0001</b>    | 39.7 (21.5) | 37.5 (22.7) | ns             | 39.7 (21.6)                     | 41.8 (21.7) | 34.9 (21.3) | ns             | ↔ ns                     | ↔ ns               | ↔ ns               |  |
| CD8+ CM like       | 16 (7.5)    | 22.1 (12.6)       | ns                   | 23.4 (13.2) | 18.9 (10.8) | ns             | 23.3 (15.4)                     | 24.2 (15.5) | 21.1 (15.8) | ns             | ↔ ns                     | ↔ ns               | ↔ ns               |  |
| CD8+ EM like       | 10.4 (9.6)  | 16.8 (13)         | <b>0.03</b>          | 16.7 (12.1) | 17.1 (15.7) | ns             | 18.3 (14.9)                     | 17.8 (14)   | 19.6 (17.3) | ns             | ↔ ns                     | ↔ ns               | ↔ ns               |  |
| CD8+ TEMRA like    | 10.9 (7.6)  | 22 (15.5)         | <b>0.0003</b>        | 20.2 (15.2) | 26.5 (15.8) | ns             | 18.7 (12.5)                     | 16.2 (11.8) | 24.5 (12.6) | <b>0.05</b>    | ↔ ns                     | ↔ ns               | ↔ ns               |  |
| <b>Bone Marrow</b> |             |                   |                      |             |             |                |                                 |             |             |                |                          |                    |                    |  |
| CD8+ Naive         | 34.1 (23.3) | 27 (15.5)         | ns                   | 26.8 (14.1) | 27.5 (20.6) | ns             | 26.8 (17.8)                     | 29.2 (18.1) | 17.3 (14)   | ns             | ↔ ns                     | ↔ ns               | ↔ ns               |  |
| CD8+ CM            | 6.4 (5.3)   | 7.5 (5.2)         | ns                   | 7.7 (5.3)   | 6.9 (4.8)   | ns             | 8.6 (4.8)                       | 7.8 (3.9)   | 11.7 (6.6)  | ns             | ↔ ns                     | ↔ ns               | ↑ <b>0.006</b>     |  |
| CD8+ EM            | 35 (20)     | 36.1 (14.3)       | ns                   | 39.2 (14.2) | 26.1 (9.2)  | <b>0.02</b>    | 41.2 (17.6)                     | 42.2 (18.3) | 37.2 (15)   | ns             | ↔ ns                     | ↔ ns               | ↔ ns               |  |
| CD8+ TEMRA         | 24.4 (15.6) | 29.5 (14.5)       | ns                   | 26.3 (12.3) | 39.5 (17.3) | <b>0.05</b>    | 23.4 (13.2)                     | 20.8 (12.2) | 33.8 (12.4) | <b>0.04</b>    | ↓ <b>0.03</b>            | ↓ <b>0.02</b>      | ↔ ns               |  |
| CD8+ Naive like    | 35.3 (24.7) | 30.6 (15.9)       | ns                   | 28.4 (14)   | 40.3 (21.3) | ns             | 27.4 (15.9)                     | 27.9 (15.8) | 25.5 (18.2) | ns             | ↔ ns                     | ↔ ns               | ↔ ns               |  |
| CD8+ CM like       | 9.4 (5.1)   | 17.4 (10.6)       | <b>0.007</b>         | 18.4 (11.2) | 12.6 (6.3)  | ns             | 19 (11.3)                       | 18.7 (10.6) | 20.4 (15)   | ns             | ↔ ns                     | ↔ ns               | ↔ ns               |  |
| CD8+ EM like       | 29 (23.4)   | 26.9 (13.9)       | ns                   | 28.5 (13.9) | 19.4 (12.4) | ns             | 31.7 (16.7)                     | 32.4 (17.7) | 28.5 (12.5) | ns             | ↔ ns                     | ↔ ns               | ↔ ns               |  |
| CD8+ TEMRA like    | 26.3 (12.8) | 25.2 (13.9)       | ns                   | 24.6 (13.9) | 27.6 (15)   | ns             | 21.9 (9.3)                      | 21 (8.9)    | 25.6 (11)   | ns             | ↔ ns                     | ↔ ns               | ↔ ns               |  |

**Supplementary Table S10.** *Antibodies used for flow cytometric analyses.*

| Antigen        | Fluorochrome | Clone  | Company     | Catalog #  | Antibody type              | Staining | Category      |
|----------------|--------------|--------|-------------|------------|----------------------------|----------|---------------|
| CD3            | APC          | OKT3   | eBioscience | 17-0037-42 | Mouse IgG2a, κ             | surface  | T-cells       |
| CD3            | AF700        | HIT3a  | BioLegend   | 300324     | Mouse IgG2a, κ             | surface  | T-cells       |
| CD3            | evolve 605   | OKT3   | eBioscience | 83-0037-42 | Mouse IgG2a, κ             | surface  | T-cells       |
| CD4            | BV605        | OKT4   | BioLegend   | 317438     | Mouse IgG2b, κ             | surface  | T-cells       |
| CD4            | PerCP Cy5.5  | OKT4   | eBioscience | 45-0048-42 | Mouse IgG2b, κ             | surface  | T-cells       |
| CD8            | PerCP-Cy5.5  | RPA-T8 | eBioscience | 45-0088-42 | Mouse IgG <sub>1</sub> , κ | surface  | T-cells       |
| CD8            | pacorange    | 3B5    | Invitrogen  | MHCD0830   | Mouse IgG2a                | surface  | T-cells       |
| CD45RA         | APC-Cy7      | HI100  | BioLegend   | 304128     | Mouse IgG2b, κ             | surface  | Memory marker |
| CCR7           | BV650        | G043H7 | BioLegend   | 353234     | Mouse IgG2a, κ             | surface  | Memory marker |
| CD56           | PE-Cy7       | HCD56  | BioLegend   | 318318     | Mouse IgG <sub>1</sub> , κ | surface  | NK / NK-T     |
| CD56           | PECF594      | B159   | BD          | 562289     | Mouse IgG <sub>1</sub> , κ | surface  | NK / NK-T     |
| 2B4 (CD244)    | FITC         | C1.7   | BioLegend   | 329506     | Mouse IgG <sub>1</sub> , κ | surface  | inhibitory    |
| BTLA (CD272)   | AF647        | MIH26  | BioLegend   | 344510     | Mouse IgG2a, κ             | surface  | inhibitory    |
| BTLA (CD272)   | PE           | MIH26  | BioLegend   | 344506     | Mouse IgG2a, κ             | surface  | inhibitory    |
| CD160          | AF488        | BY55   | eBioscience | 53-1609-42 | Mouse IgM                  | surface  | inhibitory    |
| CD244 (2B4)    | FITC         | C1.7   | BioLegend   | 329506     | Mouse IgG <sub>1</sub> , κ | surface  | inhibitory    |
| CTLA-4 (CD152) | PE-Cy7       | L3D10  | BioLegend   | 349914     | Mouse IgG2a, κ             | surface  | inhibitory    |
| PD-1 (CD279)   | PE           | EH12.1 | BD          | 560795     | Mouse IgG <sub>1</sub> , κ | surface  | inhibitory    |

|               |                      |           |             |            |                            |               |                  |
|---------------|----------------------|-----------|-------------|------------|----------------------------|---------------|------------------|
| TIM3 (CD366)  | PE                   | 344823    | R & D       | FAB2365P   | Rat IgG2A                  | surface       | inhibitory       |
| CD57          | Pacific Blue (V450)  | HCD57     | BioLegend   | 322316     | Mouse IgM, κ               | surface       | senescence       |
| KLRG1         | AF488                | 13F12F2   | Pircher, DE |            | Mouse IgG2a, κ             | surface       | senescence       |
| 4-1BB (CD137) | PerCP Cy5.5          | 4B4-1     | BioLegend   | 309813/4   | Mouse IgG1, κ              | surface       | stimulatory      |
| CD127         | Pacific Blue (V450)  | eBioRDR5  | eBioscience | 48-1278-42 | Mouse IgG <sub>1</sub> , κ | surface       | stimulatory      |
| CD127         | APC eFluor 780       | eBioRDR5  | eBioscience | 47-1278-42 | Mouse IgG <sub>1</sub> , κ | surface       | stimulatory      |
| CD27          | AF700                | M-T271    | BD          | 560611     | Mouse IgG <sub>1</sub> , κ | surface       | stimulatory      |
| CD27          | BV605                | O323      | BioLegend   | 302830     | Mouse IgG1, κ              | surface       | stimulatory      |
| CD28          | PE-Cy7               | CD28.2    | eBioscience | 25-0289-42 | Mouse IgG1, κ              | surface       | stimulatory      |
| ICOS (CD278)  | APC (AF647)          | C398.4A   | BioLegend   | 313516     | Armenian Hamster IgG       | surface       | stimulatory      |
| OX40 (CD134)  | PE                   | ACT35     | BD          | 555838     | Mouse IgG <sub>1</sub> , κ | surface       | stimulatory      |
| CD45          | FITC                 | HI30      | BioLegend   | 304006     | Mouse IgG <sub>1</sub> , κ | surface       | T-cells / Blasts |
| CD45          | PE Texas Red (CF594) | HI30      | BD          | 562279     | Mouse IgG <sub>1</sub> , κ | surface       | T-cells / Blasts |
| CD33          | Pacific Blue (V450)  | P67.6     | eBioscience | 48-0337-42 | Mouse IgG <sub>1</sub>     | surface       | Blasts           |
| CD34          | APC eFluor 780       | 4H11      | eBioscience | 47-0349-42 | Mouse IgG <sub>1</sub> , κ | surface       | Blasts           |
| IFN-γ         | PE                   | 4S.B3     | eBioscience | 12-7319-42 | Mouse IgG <sub>1</sub> , κ | intracellular | Cytokines        |
| IL-2          | PE-Cy7               | MQ1-17H12 | eBioscience | 25-7029-42 | Rat IgG2a, κ               | intracellular | Cytokines        |
| TNFα          | FITC                 | MabII     | BioLegend   | 502906     | Mouse IgG <sub>1</sub> , κ | intracellular | Cytokines        |
| Granzyme B    | FITC                 | GB11      | BioLegend   | 515403     | Mouse IgG <sub>1</sub> , κ | intracellular | Effector         |



|                                       |                     |         |                   |            |                            |               |               |
|---------------------------------------|---------------------|---------|-------------------|------------|----------------------------|---------------|---------------|
| Ki67                                  | PerCP Cy5.5         | B56     | BD                | 561284     | Mouse IgG <sub>1</sub> , κ | intracellular | proliferation |
| Eomes                                 | PE                  | WD1928  | eBioscience       | 12-4877-42 | Mouse IgG <sub>1</sub> , κ | intracellular | transcription |
| FoxP3                                 | Pacific Blue (V450) | PCH101  | eBioscience       | 48-4776-42 | Mouse IgG2a, κ             | intracellular | transcription |
| T-bet                                 | PECF594             | O4-46   | BD                | 562467     | Mouse IgG <sub>1</sub> , κ | intracellular | transcription |
| Cleaved Caspase 3                     | APC (AF647)         | C92-605 | BD                | 560626     | Rabbit IgG                 | intracellular | Apoptosis     |
| LIVE/Dead fixable Aqua Dead stain kit |                     |         | Life Technologies | L34957     |                            |               | Viability     |
| OX40L                                 | Purified            |         | BioLegend         | 555704     |                            | surface       | Blocking mAB  |
| PD-1                                  | Purified            |         | BMS               |            |                            | surface       | Blocking mAB  |

## SUPPLEMENTARY REFERENCES

1. Amir el AD, Davis KL, Tadmor MD, Simonds EF, Levine JH, Bendall SC, *et al.* viSNE enables visualization of high dimensional single-cell data and reveals phenotypic heterogeneity of leukemia. *Nature biotechnology* **2013**;31(6):545-52.
2. Bruggner RV, Bodenmiller B, Dill DL, Tibshirani RJ, Nolan GP. Automated identification of stratifying signatures in cellular subpopulations. *Proceedings of the National Academy of Sciences of the United States of America* **2014**;111(26):E2770-7.
3. Gaudilliere B, Fragiadakis GK, Bruggner RV, Nicolau M, Finck R, Tingle M, *et al.* Clinical recovery from surgery correlates with single-cell immune signatures. *Science translational medicine* **2014**;6(255):255ra131.
4. Roederer M, Nozzi JL, Nason MC. SPICE: exploration and analysis of post-cytometric complex multivariate datasets. *Cytometry Part A : the journal of the International Society for Analytical Cytology* **2011**;79(2):167-74.
5. Bindea G, Mlecnik B, Hackl H, Charoentong P, Tosolini M, Kirilovsky A, *et al.* ClueGO: a Cytoscape plug-in to decipher functionally grouped gene ontology and pathway annotation networks. *Bioinformatics* **2009**;25(8):1091-3.
6. Subramanian A, Tamayo P, Mootha VK, Mukherjee S, Ebert BL, Gillette MA, *et al.* Gene set enrichment analysis: a knowledge-based approach for interpreting genome-wide expression profiles. *Proceedings of the National Academy of Sciences of the United States of America* **2005**;102(43):15545-50.
7. Sturn A, Quackenbush J, Trajanoski Z. Genesis: cluster analysis of microarray data. *Bioinformatics* **2002**;18(1):207-8.
8. Willinger T, Freeman T, Hasegawa H, McMichael AJ, Callan MF. Molecular signatures distinguish human central memory from effector memory CD8 T cell subsets. *J Immunol* **2005**;175(9):5895-903.
9. Quigley M, Pereyra F, Nilsson B, Porichis F, Fonseca C, Eichbaum Q, *et al.* Transcriptional analysis of HIV-specific CD8+ T cells shows that PD-1 inhibits T cell function by upregulating BATF. *Nat Med* **2010**;16(10):1147-51.
10. Dohner H, Estey E, Grimwade D, Amadori S, Appelbaum FR, Buchner T, *et al.* Diagnosis and management of AML in adults: 2017 ELN recommendations from an international expert panel. *Blood* **2017**;129(4):424-47.
11. Estey E. Acute myeloid leukemia: 2016 Update on risk-stratification and management. *Am J Hematol* **2016**;91(8):824-46.
12. Grimwade D, Walker H, Oliver F, Wheatley K, Harrison C, Harrison G, *et al.* The Importance of Diagnostic Cytogenetics on Outcome in AML: Analysis of 1,612 Patients Entered Into the MRC AML 10 Trial. *Blood* **1998**;92(7):2322-33.
